# Supplementary material for: Implementing family involvement in the treatment of patients with psychosis: a systematic review of facilitating and hindering factors
Source: PubMed Central journal article supplement — BMJ Open. 2014 Oct 3;4(10):e006108. doi: 10.1136/bmjopen-2014-006108 (PMC4187461; doi:10.1136/bmjopen-2014-006108), 2014-10-03
Supplement: bmjopen-2014-006108.draft_revisions.pdf [file bmjopen-2014-006108.draft_revisions.pdf]

# BMJ Open

## Implementing family involvement in the treatment of patients with psychosis: a systematic review of facilitators and hindering factors.

|                                 |                                                                                                                                                                                                                                                                                                                                                                                   |
|---------------------------------|-----------------------------------------------------------------------------------------------------------------------------------------------------------------------------------------------------------------------------------------------------------------------------------------------------------------------------------------------------------------------------------|
| Journal:                        | <i>BMJ Open</i>                                                                                                                                                                                                                                                                                                                                                                   |
| Manuscript ID:                  | bmjopen-2014-006108                                                                                                                                                                                                                                                                                                                                                               |
| Article Type:                   | Research                                                                                                                                                                                                                                                                                                                                                                          |
| Date Submitted by the Author:   | 14-Jul-2014                                                                                                                                                                                                                                                                                                                                                                       |
| Complete List of Authors:       | Eassom, Erica; Queen Mary University of London, Unit for Social and Community Psychiatry<br>Giacco, Domenico; Queen Mary University of London, Unit for Social and Community Psychiatry<br>Dirik, Aysegul; Queen Mary University of London, Unit for Social and Community Psychiatry<br>Priebe, Stefan; Queen Mary University of London, Unit for Social and Community Psychiatry |
| <b>Primary Subject Heading</b>: | Mental health                                                                                                                                                                                                                                                                                                                                                                     |
| Secondary Subject Heading:      | Mental health, Communication, Evidence based practice                                                                                                                                                                                                                                                                                                                             |
| Keywords:                       | Schizophrenia & psychotic disorders < PSYCHIATRY, Health policy < HEALTH SERVICES ADMINISTRATION & MANAGEMENT, Organisational development < HEALTH SERVICES ADMINISTRATION & MANAGEMENT, Quality in health care < HEALTH SERVICES ADMINISTRATION & MANAGEMENT                                                                                                                     |
|                                 |                                                                                                                                                                                                                                                                                                                                                                                   |

SCHOLARONE™  
Manuscripts

## TITLE PAGE

‘Implementing family involvement in the treatment of patients with psychosis: a systematic  
review of facilitators and hindering factors’

Erica Eassom<sup>a</sup>, Domenico Giacco<sup>a§</sup>, Aysegul Dirik<sup>a</sup> and Stefan Priebe<sup>a</sup>

§Correspondence to: D. Giacco [d.giacco@qmul.ac.uk](mailto:d.giacco@qmul.ac.uk)

<sup>a</sup>Unit for Social and Community Psychiatry (World Health Organization Collaborating  
Centre for Mental Health Services Development), Queen Mary University of London,  
Newham Centre for Mental Health, London, E13 8SP, UK.

Tel: +44 (0)20 7540 6755

Fax: +44 (0)20 7540 2976

## ABSTRACT

### Objective:

To synthesise the evidence on implementing family involvement in the treatment of patients with psychosis with a focus on barriers, problems and facilitators.

### Design:

Systematic review of studies evaluating the involvement of families in tripartite communication between health professionals, 'families' (or other unpaid carers) and adult patients, in a single-family context. A theoretical thematic analysis approach and thematic synthesis were used.

### Data sources:

A systematic electronic search was carried out in seven databases, using database specific search strategies and controlled vocabulary. A secondary hand search of grey literature was performed as well as using forwards and backwards snowballing techniques.

### Results:

A total of 43 studies were included. The majority featured qualitative data (n=40), focused solely on staff experiences (n=34) and were carried out in the United Kingdom (n=24). Facilitating training and ongoing supervision needs of staff are necessary but not sufficient conditions for a consistent involvement of families. Organisational cultures and paradigms can work to limit family involvement, and effective implementation appears to operate via a whole team co-ordinated effort, at every level of the organisation, supported by strong leadership. Reservations about family involvement regarding power relations, fear of negative outcomes and the need for an exclusive patient-professional relationship may be explored and addressed through mutually trusting relationships.

### Conclusions:

1  
2  
3 Implementing family involvement carries additional challenges beyond those generally  
4 associated with translating research to practice. Implementation may require a cultural and  
5 organisational shift towards working with families. Family work can only be implemented if  
6 this is considered a shared goal of all members of a clinical team and/or mental health  
7 service, including the leaders of the organisation. This may imply a change in the ethos and in  
8 the way of working of a clinical team, as well as the establishment of working routines that  
9 facilitate family involvement approaches.  
10  
11  
12  
13  
14  
15  
16  
17  
18  
19

### 20 21 **Strengths and Limitations**

22 Our study:

- 23  
24  
25  
26 • Can inform policies and guidelines on family involvement so that they impact on  
27 routine practice.
- 28  
29  
30 • Is novel in covering a wide range of family involvement practices, highlighting  
31 common barriers, problems and facilitators.
- 32  
33  
34 • Synthesises rich qualitative data from professionals, patients and families.
- 35  
36  
37 • Could not include subgroup and quality analyses, due to the high correspondence  
38 between type of family involvement practice and methodology.
- 39  
40  
41 • May be conceptually limited as extant research has focused on perspectives of staff  
42 involved in family work and few studies are available on families' views.  
43  
44  
45  
46  
47  
48

### 49 **Key words:**

50 Carers; Psychosis; Severe mental illness (SMI); Family Intervention (FI); Implementation

51  
52  
53  
54  
55 Word count: 4,451 (excluding title page, abstract, references, figures and tables)  
56  
57  
58  
59  
60

## BACKGROUND

1  
2  
3  
4  
5 The process of deinstitutionalisation of mental health care in the western world has led to families and others  
6  
7 in the community shouldering the psychosocial burden of care and informally adopting the role previously  
8  
9 provided by professionals in health care services [1-3]. The adoption of protected terms such as ‘carer’ in the  
10  
11 United Kingdom (UK) and ‘caregiver’ in the United States (US) is a response to the substantial, yet ‘non-  
12  
13 professional’, role that individuals in a close relationship have in supporting a person receiving mental  
14  
15 health treatment. The term may include parents, partners, siblings, children, friends or other people  
16  
17 significant to the individual: essentially, anyone who provides substantial support without being paid. The  
18  
19 term carer can be problematic, being considered by some to have connotations of dependency and of  
20  
21 minimising the significance of the relationship [4]. Also, many ‘carers’ do not self-identify as such, and  
22  
23 consider their caring role as being within the traditional responsibilities expected of them. To avoid  
24  
25 confusion when referring to family-directed initiatives, the single term ‘families’ will be adopted throughout  
26  
27 this review, and broadly applies to a person’s social network, not excluding their non-blood relatives.  
28  
29  
30  
31  
32

33  
34 ‘Family involvement’ in mental health services can take different forms, depending on the level of need and  
35  
36 availability of services. Generally, it can be conceived on a spectrum from more basic functions to  
37  
38 specialised interventions, the minimal level including the provision of general information on the mental  
39  
40 health service and assessments. On a more complex and specialised level, services can offer families  
41  
42 psychoeducation, consultation, Family Interventions (FIs) and therapies [5]. There are both strong economic  
43  
44 and moral imperatives to establish meaningful involvement and true collaborative working between families  
45  
46 and health professionals. These are recognised by international government policies and psychiatric  
47  
48 guidelines stipulating that families should be supported and actively involved in psychiatric treatment [6-  
49  
50 11]. Families can encourage engagement with treatment plans, recognise and respond to early warning signs  
51  
52 of relapse [12] and assist in accessing services during period of crisis [13-15]. Family involvement can lead  
53  
54 to better outcomes from psychological therapies [16] and pharmacological treatments [17], fewer inpatient  
55  
56 admissions, shorter inpatient stays, and better quality of life reports by patients [18-21].  
57  
58  
59  
60

1  
2 However, despite the vast evidence base for Family Intervention [22-28] and Family Psychoeducation [29],  
3  
4 evidence suggests that family involvement is often not implemented in routine mental health care. There is  
5  
6 an abundance of both quantitative and qualitative studies into experiences of inpatient care reporting that  
7  
8 families feel marginalised and distanced from the care planning process. Common themes across  
9  
10 international studies indicate that families feel isolated, uninformed, lack a recognised role and are not  
11  
12 listened to or taken seriously [1 , 30-43]. Families also commonly report feeling that confidentiality is used  
13  
14 by professionals as a way to not to share information [39 , 44]. Family Intervention as a treatment approach  
15  
16 is startlingly under-implemented, with extremely low numbers of families actually receiving it in clinical  
17  
18 services [11 , 45-47]. It is the case that for many, contact between professionals and families remains limited  
19  
20 to telephone calls during crisis periods [48].  
21  
22  
23  
24  
25

26  
27 Why is family involvement in treatment so under-applied? There has been much debate about the reasons  
28  
29 (e.g. [22 , 49-51]) and some suggest they are linked to general problems of implementing new evidence-  
30  
31 based practices in clinical services [29]. Other proposed barriers are more specific to family interventions,  
32  
33 such as the danger of increasing burden related to caregiving, role strain, lack of experience and/or interest  
34  
35 [52] and the complexities of navigating confidentiality [53]. Such discussions are largely speculative and  
36  
37 reviews of evidence tend to focus on the provision of specific interventions, such as Family Psychoeducation  
38  
39 [29] or Family Intervention [54]. This systematic review aims to assess how the involvement of families is  
40  
41 implemented in the treatment of patients with psychosis, taking a broad view of involvement as described  
42  
43 above in order to capture the barriers, problems and facilitators that are operating in practice. In doing so,  
44  
45 this may help to better define and implement families' involvement in psychiatric treatment in the future.  
46  
47  
48  
49  
50

## 51 **METHODS**

### 52 **Identifying relevant studies**

53  
54  
55 Computerised databases were searched for eligible studies: MEDLINE, EMBASE, PsycINFO, AMED (via  
56  
57 Ovid), BNI and CINAHL (via HILO), Social Sciences Citations Index (via Web of Knowledge) and CDSR,  
58  
59  
60

1 DARE and CENTRAL (via the Cochrane Library). Word groups representing patient diagnosis, intervention  
2 and involvement terms and outcome descriptors were combined in several ways. Strategies were adapted for  
3 each database, using controlled vocabulary (MeSH, Emtree, Thesaurus of Psychological Index Terms) and  
4 free text (see Supplementary File). The search was last repeated on 01/06/2014.  
5  
6  
7

8  
9  
10 Publication bias was minimised by including conference papers and book chapters, searching grey literature  
11 for dissertations and reports (ETHOS, SIGL) and corresponding with authors to identify further works. Both  
12 backward snowballing (from the reference lists of included studies and identified reviews) and forward  
13 snowballing (finding citations to the papers) was conducted.  
14  
15  
16  
17

### 21 22 **Inclusion procedure**

23  
24 A study was eligible for inclusion if: 1) it was an original collection of data; 2) situated in primary or  
25 secondary mental health services; 3) the patient population included people being treated for psychotic  
26 disorders<sup>1</sup>; 4) the intervention involved tripartite communication between health professionals (any),  
27 families (unpaid carers) and adult patients, excluding those focused exclusively on professional–family  
28 communication, family–family communication or multiple–family groups; and 5) results described barriers,  
29 problems and/or facilitators to involving families in treatment. No study type was excluded, however only  
30 Latin-script languages were able to be translated.  
31  
32  
33  
34  
35  
36  
37  
38  
39  
40  
41

42 “Barriers” were defined as factors that prevented an approach from taking place or limited the scope of it,  
43 “problems” referred to issues that emerged when delivering an approach and “facilitators” were considered  
44 to be any factors that aided implementation or delivery. “Family involvement” was defined inclusively as  
45 any process allowing health professionals, families and patients to actively collaborate in treatment, such as  
46 in making joint treatment decisions. Studies not reporting clear information on how families were involved  
47 in treatment were excluded. Studies into general experiences, opinions, satisfaction or needs were also  
48 excluded, unless they related to a clearly described specific involvement in treatment.  
49  
50  
51  
52  
53  
54  
55  
56

57  
58 <sup>1</sup> Attempts were made where possible to focus on patients with psychosis, however many studies used opportunity sampling of  
59 mixed ‘severe mental illness’ groups, which were included in order to be as inclusive as possible.  
60

1  
2 Two reviewers (EE and DG) screened all of the titles and collected relevant abstracts. These were screened  
3  
4 and then discarded if they did not fit the selection criteria. Studies that seemed to include relevant data or  
5  
6 information were retrieved and their full text versions analysed and examined for study eligibility. All final  
7  
8 full text choices were confirmed and agreed by both reviewers.  
9

### 10 11 12 13 **Method of Analysis**

14  
15 Data extraction and synthesis was guided by the *Economic and Social Research Council (ESRC)*'s Guidance  
16  
17 on the Conduct of Narrative Synthesis in Systematic Reviews [55].  
18  
19

20  
21  
22 The included studies used both qualitative and quantitative methods, yet clearly had conceptual overlaps  
23  
24 despite reporting results in different formats. Any available quantitative data was usually descriptive,  
25  
26 reported in addition to qualitative findings and was largely used to explore existing themes or concepts. It  
27  
28 was therefore considered appropriate to transform quantitative findings into qualitative form to  
29  
30 systematically identify the main concepts across the studies using thematic analysis [55 , 56]. The use of this  
31  
32 method is increasingly being advocated with studies involving data that is quantitative or from mixed  
33  
34 methods [56-58] to address questions relating to intervention need, appropriateness and acceptability in  
35  
36 systematic reviews [59].  
37  
38  
39  
40  
41

### 42 **Data extraction and synthesis**

43  
44  
45  
46 Theoretical Thematic Analysis [60] using inductive themes to identify the barriers, problems and facilitators  
47  
48 of family involvement was used as a framework to explore further themes.  
49

50  
51  
52  
53 Two non-clinician researchers (EE and AD) independently extracted author interpretations and participant  
54  
55 data from the included studies using a piloted data extraction sheet. They then separately allocated the  
56  
57 findings to relevant sections of the framework (e.g. "barriers according to staff perspectives") and coded the  
58  
59  
60



1 data within each section. Identified categories (e.g. 'unsupportive attitudes of managers') were aggregated  
2 into subthemes (e.g. 'Attitudes towards family work') and finally became grouped under overarching themes  
3 (e.g. 'Context: Addressing Organisational Culture'). These emerging themes were discussed throughout  
4 analysis along with a clinician-researcher (DG), and discrepancies were resolved through iterative  
5 discussions. Robustness of the synthesis was investigated and themes were checked for completeness. Two  
6 clinician-researchers (DG and SP) acted as third party assessors of the final data synthesis.  
7  
8  
9  
10  
11  
12  
13

## 14 **RESULTS**

### 15 **Included studies**

16 Database searching produced 9950 titles to screen. After removing duplicates and irrelevant papers, a full  
17 text assessment of 119 documents was conducted. Twenty eight publications met our inclusion criteria and  
18 second stage searching including grey literature searching, personal correspondence and snowballing  
19 techniques led to the further identification and inclusion of 15 articles. This brought the final number of  
20 documents to 43. The PRISMA flowchart in Figure 1 depicts the identification and exclusion of articles.  
21  
22  
23  
24  
25  
26  
27  
28  
29  
30  
31

32 (Insert Figure 1 here)  
33  
34  
35

### 36 **Overview of papers**

37 Forty papers were published between 1991-2013 and one in 1978. Just over half of the studies were based  
38 on UK findings, with the rest from Finland, the USA, Italy, Australia, Canada, Germany, India, New  
39 Zealand, Spain, Greece and Portugal. Mainly, papers reported on experiences of implementing Family  
40 Intervention approaches (n=33). Typically these followed a similar structure and were broadly modelled on  
41 the Behavioural Family Therapy approach [61] (see Supplementary File for full study characteristics). This  
42 included variations such as 'Psychosocial Intervention' and 'Family Psychoeducation' that fit the model of a  
43 Family Intervention. The remainder explored Open Dialogue approaches (n=6), Systemic Psychotherapy  
44 (n=5) and one purely Behavioural Therapy programme. The vast majority were cross-sectional studies and  
45 13 were naturalistic evaluations, descriptions or case studies of a service. In all, 37 papers explored staff  
46  
47  
48  
49  
50  
51  
52  
53  
54  
55  
56  
57  
58  
59  
60

1 perspectives, eight papers featured patient perspectives and six featured 'family' perspectives. In total, the  
2 review included data of 588 professionals, 321 patients and 276 'family members' or 'families'.  
3  
4  
5  
6

### 7 **In depth review: Synthesis across studies**

8  
9  
10

11 Figure 2 summarises the final cross-study synthesis: the identified barriers/problems (in red) and facilitators  
12 (in green) and the themes in which they seemed to be operating. The themes closely relate to temporal  
13 sequencing in the process of delivering an intervention: the *context*, *engagement*, and then *delivery*. The  
14 figure provides a visual representation of the matches and gaps between barriers and facilitators related to  
15 involving families. This is for the most part conceptual, as barriers and their direct facilitators may not have  
16 been discussed in the same study. The themes and sub-themes are explored in greater detail in the synthesis  
17 below, which includes details of problems associated with delivering approaches that involve families as  
18 well as barriers and facilitators of this work.  
19  
20  
21  
22  
23  
24  
25  
26  
27  
28  
29  
30  
31

32 (Insert Figure 2 here)  
33  
34  
35

#### 36 *Context: Addressing the Organisational Culture*

37  
38

39 This theme reflects the majority of the findings, mostly from staff perspectives. Their experience  
40 implementing family work could be characterised as working in relative isolation in a system where  
41 colleagues and managers did not value and prioritise family involvement or were openly hostile to it. With  
42 multi-disciplinary co-operation and working systems not in place, practical burdens associated with family  
43 work were sometimes insurmountable. Mirroring this, factors that enabled family involvement to take place  
44 were related to top-down management support, prioritisation and changing the culture of family work.  
45  
46  
47  
48  
49  
50  
51  
52

#### 53 *Organisational Attitudes and Paradigms*

54  
55  
56  
57  
58  
59  
60

1  
2  
3  
4  
5  
6  
7  
8  
9  
10  
11  
12  
13  
14  
15  
16  
17  
18  
19  
20  
21  
22  
23  
24  
25  
26  
27  
28  
29  
30  
31  
32  
33  
34  
35  
36  
37  
38  
39  
40  
41  
42  
43  
44  
45  
46  
47  
48  
49  
50  
51  
52  
53  
54  
55  
56  
57  
58  
59  
60

This subtheme covered general attitudes, such as family involvement not being valued at organisational and team level but also highlighted possible entrenched reasons for this. For example, individualistic, biological paradigms made family work seem secondary or optional [62-64] and staff found it difficult to adopt a collaborative stance, relinquishing the role of didactic problem solver [63]. In some cases, it appeared that historical negative attitudes towards families had not shifted [62, 64]. Anti-family work attitudes described amongst colleagues ranged from resistance towards the approaches [63, 65-68] to well-intentioned but complicating beliefs regarding clinicians' duty towards the patient [64, 69, 70]. Facilitators related not only to specific strategies but to an overall shared culture and prioritisation of family work [64, 71, 72], shifting attitudes towards viewing the family as equal partners [71, 73] and thinking more systemically about problems [71, 74].

### *Practical Needs Associated with Family Work*

Overwhelmingly, staff reported on the practical burdens of family work: that it requires time, resources and funding and is difficult to integrate with other clinical casework [62, 64-70, 73, 75-87], particularly in areas with high demands and clinical crises [73, 82, 83]. Specific needs reported for family work included flexible hours [64, 65, 67, 70, 80, 82-84, 87-90] and the accommodation of family requirements such as childcare facilities [80] or home visits [82, 89, 91]. A lack of systems and structure for carrying out and recording family work was also reported as a barrier to implementation and problem during delivery [63, 87, 92]. This included a lack of co-ordination between inpatient and outpatient care [62]. These issues were compounded by reports of services and managers not making time allowances for family work e.g. not providing time in lieu for out of hours work [64, 65, 77, 83, 84] or obstructing time use e.g. by refusing the release of staff for training [63].

### *Management Culture*

Commonly, staff reported on the unsupportive attitudes of managers and colleagues as limiting the implementation of family involvement [63, 64, 66, 77-79, 87, 92, 93]. This ranged from a “*management culture of benign neglect rather than of active opposition*” [93] to overt challenges such as not respecting

1 ring-fenced time for family work [87]. The strongest facilitator seemed to be that of strong leadership  
2 through senior management support and developing strategic solutions. This “sanctioned” family work,  
3 giving it core priority status within the service [64], and could facilitate specific powerful initiatives such as  
4 writing family work into business plans, policies and job descriptions of all staff [63 , 79]. Further  
5 endorsement came from providing flexible hours, creating new staff roles and financial provision [63 , 73 ,  
6 79 , 94]. The value emerged of having regular multi-disciplinary meetings to address team-specific needs  
7 [72 , 78 , 79 , 88] and developing strategies that prioritised family work and made it a part of regular clinical  
8 practice [63 , 72 , 73 , 79 , 88 , 94]. This included having routine assessment of all families, asking clinicians  
9 about families when reviewing caseloads and providing regular feedback of family data to teams and  
10 managers [63 , 94].  
11  
12  
13  
14  
15  
16  
17  
18  
19  
20  
21

### 22 *Training Needs*

23  
24  
25  
26 Staff also reported on lacking access to adequate supervision and training[62 , 63 , 65 , 66 , 83 , 86 , 87 , 92]  
27 as barriers to implementation. This may link with reports of staff lacking skills or confidence to do the work  
28 [62 , 64 , 85 , 86 , 92]. Some problems during delivery (such as managing family dynamics [64 , 65 , 70 , 74  
29 , 78 , 88 , 95]) could also be related to staff skills and experience [71 , 78 , 81]. As expected, having a  
30 structured regime of supervision, encouraging attendance and ongoing support was described as helping  
31 staff to deliver work with families [63 , 72 , 78 , 79 , 88]. Staff also reported on the value of belief in the  
32 approach and having an identity in their role [71 , 72 , 79 , 81 , 86].  
33  
34  
35  
36  
37  
38  
39  
40  
41

### 42 *Team Attitudes, Commitment and Multi-disciplinary Co-operation*

43  
44  
45 Difficulties arose when only a minority of team members had been trained in an intervention [82]. Staff  
46 reported that collaboration was often lacking [63 , 65 , 69 , 73 , 77 , 80] and that involving families requires  
47 whole team commitment [76 , 82]. ‘Ownership’ was sometimes an issue, with various staff groups  
48 perceiving family work as within the domain of other roles, not theirs [69 , 80]. Role and team-specific  
49 issues also emerged, such as psychiatrists, inpatient staff and home treatment teams being less involved [63 ,  
50  
51  
52  
53  
54  
55  
56  
57  
58  
59  
60

66 , 73 , 81]. Collaboration in the form of multi-disciplinary co-working, peer-supervision and whole team approaches were all reported as aids to implementing family work [63 , 66 , 71-74 , 78 , 79 , 82 , 88].

Problems with finding ‘appropriate’ referrals were reported widely [65 , 67 , 68 , 77 , 78 , 80 , 82 , 83 , 93].

Whilst some patients do not have families, the pervasiveness of this response also called into question staff members’ pre-existing ideas about what constitutes an ‘appropriate’ family for intervention. Staff reported the resistance of other professionals to make referrals [67 , 88], family work services being “forgotten” and referrals being made as a “last resort”, by which time the families themselves may have grown resistant [93].

Acting as a facilitator was the promotion of family work, both as a cascading effect through colleagues and across services [64 , 79 , 87].

#### *Engagement: Addressing Concerns through Openness, Encouragement and Building Alliance*

The next theme related to the process of engagement, informed more broadly by both staff and family responses. A picture emerged of families sometimes being reluctant to engage, and of valid concerns. Yet the successful establishment of trusting relationships indicates these concerns may be surmountable in many cases.

#### *Reservations about Involving Families*

Similar issues around the nature of involving families emerged as a barrier to families becoming involved and as problems during treatment. Some concerns seemed linked to fears around power and control: bi-directional privacy concerns (keeping the extent of the illness from the family and family issues from services) [70] and patient fears of placing relatives in a position of power [70 , 95] or exposing one’s vulnerability [75]. Responses in all three participant groups addressed the need for an exclusive patient-professional relationship [69 , 70 , 76 , 95]. Existing individual and family problems (such as patient symptoms being directed at family members [62]) also precluded family involvement. Both families and staff expressed fears of making the current situation worse, such as by burdening the family and worsening

1 the patient's symptoms [70 , 80 , 84 , 86 , 91]. Professionals described building trust and rapport, through  
2 open discussions with the family, acknowledging concerns and providing reassurance [71 , 74 , 88 , 91].  
3  
4

### 5 *Problems Engaging Families*

6  
7

8 These were often unspecified as scepticism, lack of motivation or refusal from the families, occurring prior  
9 to engagement or during treatment [65 , 76 , 78 , 83 , 84 , 88 , 93 , 96]. As professional responses, these may  
10 reflect their attitudes towards families as unmotivated, but also describe the failure of the team to mobilise  
11 the family in favour of treatment [96]. A factor described as a facilitator was having a critical period of  
12 engagement: intensive efforts at contact and involvement early on after contact with services [93 , 96-99]  
13 and presenting the approach enthusiastically [71 , 89] functioned to establish collaborative relationships  
14 between families and professionals as the modus operandi.  
15  
16  
17  
18  
19  
20  
21  
22  
23  
24  
25  
26  
27

### 28 *Delivery: Active Collaboration, Professional Skills and Respect for Families as Individuals*

29  
30

31 The final theme related to factors that affected how staff members delivered family interventions and how  
32 families experienced them. As a whole, both family and staff responses highlight the important of respectful,  
33 equal partnership, enhanced by professional skills and experience.  
34  
35  
36

### 37 *Working Relationships Between Families and Professionals*

38  
39

40 Collaboration between families and professionals on an equal footing appeared valued by both families and  
41 professionals. Lack of collaboration was cited as a problem during delivery, resulting in families feeling  
42 patronised or not understood[76]. Open Dialogue papers particularly emphasised the lack of success when  
43 actions were unilaterally decided, rather than emerging from a joint process [74 , 99]. Factors helping to  
44 overcome this included being able to relinquish control, i.e. tolerate uncertainty in order to allow a joint  
45 solution to emerge [78 , 96 , 98-100], approaching the family on an equal basis [71] and actively  
46 collaborating with families during meetings [66 , 71 , 89 , 92 , 96].  
47  
48  
49  
50  
51  
52  
53  
54  
55  
56  
57  
58  
59  
60

1  
2  
3  
4  
5  
6  
7  
8  
9  
10  
11  
12  
13  
14  
15  
16  
17  
18  
19  
20  
21  
22  
23  
24  
25  
26  
27  
28  
29  
30  
31  
32  
33  
34  
35  
36  
37  
38  
39  
40  
41  
42  
43  
44  
45  
46  
47  
48  
49  
50  
51  
52  
53  
54  
55  
56  
57  
58  
59  
60

How families experienced an approach closely linked with their experience of the professional. Some families reported experiencing an approach as negative or critical, both through the model itself e.g. its characterisation of illness [101], or experiences of the professional, perhaps as criticising parenting [101 , 102]. Yet the interpersonal qualities of the professional and the establishment of a therapeutic alliance strongly emerged as facilitators: professionals being informed, genuine, warm, non-blaming [71 , 89 , 101] and demonstrating an awareness and understanding of the problems of the whole family [71 , 79 , 89 , 90 , 99].

A lack of continuity was cited as a problem [99], whilst a facilitator was having the same team involved from the beginning and staying with the family throughout the treatment process [96 , 98 , 99].

#### *Individualisation within the approach*

Approaches were sometimes described as culturally insensitive [76 , 88]: rigid, manualised approaches did not meet the general needs of particular groups whilst individual needs, such as illiteracy, were sometimes not catered to [64 , 76 , 97 , 103]. Professionals and families valued having a clear structure whilst allowing for flexibility [71 , 76 , 88 , 99]. Professionals' skills were also important, by way of communicating information in an easy-to-understand format, avoiding jargon [71 , 88 , 89 , 99] and developing an individualised and contextualised approach [71 , 76 , 88 , 93 , 99].

#### *Working with Complex Needs*

Professionals highlighted the complexities of working both with families and with patients with psychosis. The difficulties of managing patient symptoms and working in a meaningful way with their beliefs [73 , 104] may be compounded by family dynamics [64 , 65 , 70 , 74 , 78 , 88 , 95 , 104] and potentially relatives' own emotional and affective problems [104]. Staff members' qualities, skills and experience in the area were naturally described as facilitators [71 , 76 , 78 , 79 , 81 , 83 , 89 , 90 , 100]. Perhaps unsurprisingly, useful skills were described as working creatively to overcome barriers, hypothesising, reflecting and persevering [71 , 79 , 100].

## **DISCUSSION**

### **Main findings**



1 Our results suggest that having ‘top-down’ support and training part of the staff to family work is necessary  
2 but not sufficient. In order to effectively implement family involvement in care, all members of a clinical  
3 team should be trained and regularly supervised and a ‘whole team approach’ should be used. Developing a  
4 clear structure for the intervention may be beneficial for the delivery of family involvement, provided that  
5 flexibility to accommodate individual needs is ensured. Concerns emerged regarding privacy, power  
6 relations, fear of negative outcomes and the need for an exclusive patient-professional relationship.  
7 Exploring and acknowledging such concerns through open, yet non-judgemental communication could  
8 facilitate the establishment of a therapeutic alliance between staff, families and patients.  
9  
10  
11  
12  
13  
14  
15  
16  
17  
18  
19

20 The findings may help to explain why family interventions – despite their overwhelming evidence base and  
21 their inclusion in practically all policies and guidelines – are so poorly implemented in routine practice. The  
22 requirements identified may be challenging given that family-oriented practice may need to be embraced by  
23 a whole organisation and included in work routines in order to be implemented.  
24  
25  
26  
27  
28  
29  
30

### 31 **Strengths and limitations**

32 To our knowledge, this is the first systematic review that specifically focused on barriers, problems and  
33 facilitators of implementation of family involvement in the treatment of patients with psychosis. This is of  
34 strong importance given the current climate of government policies and psychiatric guidelines stipulating  
35 that families should be supported and actively involved in psychiatric treatment [6-11], and the  
36 disappointments in achieving this in practice so far. The search strategy allowed for the capture of a large  
37 number of studies, different researchers independently extracted and reviewed the data and when necessary  
38 authors were contacted to clarify ambiguous information. The use of thematic analysis, described as having  
39 the “most potential for hypothesis generation” [108], allowed for understanding the larger picture, which is  
40 more than the sum of the findings. Whilst interpretative, this process has been carried out in accordance with  
41 RATS guidelines [61] and presented transparently. Though some themes were not highly recurrent -for  
42 example criticisms of manualisation emerged only in structured approaches such as Behavioural Family  
43 Therapy- in all, findings were complimentary, not contradictory. The fact that common themes emerged in  
44  
45  
46  
47  
48  
49  
50  
51  
52  
53  
54  
55  
56  
57  
58  
59  
60



1 spite of variations in approach, across 14 countries, speaks for the robustness of the findings as representing  
2 shared issues with family involvement.  
3  
4  
5  
6

7 However a number of limitations must be considered while interpreting the results of this study.  
8  
9 Methodologically, conducting sub-group analysis, i.e. for different intervention models, was not considered  
10 viable due to the strong association between type of approach and methodology used e.g. Open Dialogue  
11 with case studies and Behavioural Family Therapy with the Family Intervention Schedule (FIS)  
12 questionnaire. Carrying out a sub-group analysis may have therefore had the risk of mischaracterising  
13 certain approaches due to variation in the richness of data. Whilst there are well-established methods for  
14 assessing the quality of intervention studies, this is not the case for studies of implementation processes,  
15 qualitative or mixed methods research [56] and the use of appraisal tools in qualitative research remains  
16 contentious [109, 110]. The decision not to use quality-based analysis was therefore also based on  
17 recognition of the important contribution and explanatory value that descriptive accounts offer. Despite  
18 efforts to find grey literature, the search strategy may still have been limited in its bias towards published  
19 research, yet the nature of this review topic means that service level audits and evaluations are likely to be of  
20 relevance. Conceptually, the dominance of staff and academic perspectives may have led to barriers within  
21 the organisation being explored most thoroughly, however does not lead to the conclusion that there are no  
22 inherent problems with involving families in clinical settings.  
23  
24  
25  
26  
27  
28  
29  
30  
31  
32  
33  
34  
35  
36  
37  
38  
39  
40  
41  
42

### 43 **Comparison with available literature and implications for practice**

44  
45 Our findings reflect important key features for implementation of evidence based practices (EBP), already  
46 identified in previous research in implementation science, such as top-down input and leadership and the  
47 need for continuing consultation and training [105] The presence of management and leadership decisions  
48 and strategies operating as barriers and facilitators throughout the organisational context-both directly and  
49 indirectly-aligns with findings that leadership at all levels (e.g., executive director, middle manager, clinical  
50 supervisor) is associated with innovation [106], implementation of evidence based practice (EBP) [107], and  
51 with improving the organisational context for EBP implementation [108].  
52  
53  
54  
55  
56  
57  
58  
59  
60

1  
2 The fundamental role of the organisational context is emphasised in the literature with both culture (the  
3 normative beliefs and shared expectations of the organisation) and organisational climate (the psychological  
4 impact of the work environment on the professional) strongly moderating the uptake of evidence based  
5 practices [109]. The practice to be implemented must match the mission, values, tasks and duties of the  
6 organization and individuals within that organization [110]. The absence of a strong organisational culture  
7 favouring family work may be influenced by traditional paradigms based on the predominance of biological  
8 models of mental illness, which tend to minimise the focus on the individual's social context [50]. Also, the  
9 characterisations of families as dysfunctional and sometimes even as 'the cause of psychiatric illness',  
10 despite being widely rejected [111], may have contributed to a loss of trust in services and strained  
11 relationships between professionals and families [112]. This may explain the importance and the effort  
12 required in building alliances, which emerged in our findings. Clinicians may uphold the patient-  
13 professional alliance by addressing concerns regarding privacy and by being mindful that patients do not  
14 perceive a loss of power due to having family involvement in their care.  
15  
16  
17  
18  
19  
20  
21  
22  
23  
24  
25  
26  
27  
28  
29  
30  
31  
32  
33  
34  
35

### 36 **Future directions for research**

37  
38 So far the findings reflect more what can go wrong than real evidence of successful implementation. For  
39 example, sustainability has not been addressed in the review as this stage has hardly been reached.  
40

41  
42 More research will be needed to see which organisational steps can actually change the culture in a service  
43 so that family intervention happens, not only in a research study or with some patients, but with all families,  
44 every day, and over longer periods of time.  
45  
46  
47  
48  
49

50  
51  
52 Future studies should attempt to better capture wider views, particularly in-depth understanding of patients'  
53 and families' views. This may also enable insight into the potentially varied experiences of minority groups.  
54  
55 These views may be best obtained outside of group interviews, in which a power imbalance may be present.  
56  
57  
58  
59  
60

1  
2  
3  
4  
5  
6  
7  
8  
9  
10  
11  
12  
13  
14  
15  
16  
17  
18  
19  
20  
21  
22  
23  
24  
25  
26  
27  
28  
29  
30  
31  
32  
33  
34  
35  
36  
37  
38  
39  
40  
41  
42  
43  
44  
45  
46  
47  
48  
49  
50  
51  
52  
53  
54  
55  
56  
57  
58  
59  
60

There would be value in exploring the views of professionals who have not already demonstrated commitment to family work.

Despite a ‘whole team approach’ seeming to be the way forward for a widespread implementation of family work, there is a need to obtain insight into the organisational challenges that may be related to this and to develop clear practical guidelines for the reorganisation of clinical teams.

**Funding:** The research was partially funded by the National Institute for Health (NIHR) Research Collaboration for Leadership in Applied Health Research and Care (CLAHRC) North Thames at Bart’s Health NHS Trust.

**Competing interests:** The authors declare they have no competing interests.

**Authors’ contributions:** DG, EE and SP contributed to the conception and design of the study. EE designed and conducted the search, DG and EE selected the studies. AD and EE extracted data and carried out the thematic synthesis. EE wrote the manuscript, AD and DG reviewed and edited the manuscript and SP provided critical review of the manuscript. All authors contributed to and approved the final submitted version.

**Acknowledgements:** None

**Data Sharing Statements:** No additional data available

## REFERENCES

1. Clarke C. Relating with professionals. *Journal of Psychiatric and Mental Health Nursing* 2006;**13**(5):522-26
2. Parker G, Clarke H. Making the ends meet: do carers and disabled people have a common agenda? *Policy & Politics* 2002;**30**(3):347-59
3. Thornicroft G, Tansella M. Growing recognition of the importance of service user involvement in mental health service planning and evaluation. *Epidemiologia E Psichiatria Sociale* 2005;**14**(01):1-3
4. Guberman N, Nicholas E, Nolan M, et al. Impacts on practitioners of using research-based carer assessment tools: experiences from the UK, Canada and Sweden, with insights from Australia. *Health & Social Care in the Community* 2003;**11**(4):345-55
5. Mottaghypour Y, Bickerton A. The Pyramid of Family Care: A framework for family involvement with adult mental health services. *Advances in Mental Health* 2005;**4**(3):210-17
6. Australian Government. Carer Recognition Act 2010. Australia: Australian Government, 2010.
7. Department of Health. Recognised, valued and supported: Next steps for the Carers Strategy. London: HMSO, 2010.
8. Substance Abuse and Mental Health Services Administration (SAMHSA). Family psychoeducation: How to use the evidence-based practices KITS. Rockville, MD: U.S. Department of Health and Human Services, 2009.
9. National Institute for Mental Health in England. NIMHE Guiding Statement on Recovery: Department of Health, 2005.
10. National Collaborating Centre for Mental Health. Psychosis and schizophrenia in adults: treatment and management NICE clinical guideline 178: National Institute for Health and Care Excellence, 2014.
11. Schizophrenia Commission (Rethink). The abandoned illness: a report from Schizophrenia Commission, 2012.
12. Herz MI, Lamberti JS, Mintz J, et al. A program for relapse prevention in schizophrenia: a controlled study. *Archives of General Psychiatry* 2000;**57**(3):277-83
13. Fridgen GJ, Aston J, Gschwandtner U, et al. Help-seeking and pathways to care in the early stages of psychosis. *Social Psychiatry and Psychiatric Epidemiology* 2013;**48**(7):1033-43
14. Bergner E, Leiner AS, Carter T, et al. The period of untreated psychosis before treatment initiation: A qualitative study of family members' perspectives. *Comprehensive Psychiatry* 2008;**49**(6):530-36 doi: 10.1016/j.comppsy.2008.02.010[published Online First: Epub Date] |.
15. Morgan C, Fearon P, Hutchinson G, et al. Duration of untreated psychosis and ethnicity in the AESOP first-onset psychosis study. *Psychological Medicine* 2006;**36**(2):239-48
16. Garety PA, Fowler DG, Freeman D, et al. Risk of harm after psychological intervention: Authors' reply. *The British Journal of Psychiatry* 2008;**193**(4):345-46
17. Glick ID, Stekoll AH, Hays S. The role of the family and improvement in treatment maintenance, adherence, and outcome for schizophrenia. *Journal of Clinical Psychopharmacology* 2011;**31**(1):82-85
18. Schofield N, Quinn J, Haddock G, et al. Schizophrenia and substance misuse problems: a comparison between patients with and without significant carer contact. *Social Psychiatry and Psychiatric Epidemiology* 2001;**36**(11):523-28 doi: 10.1007/s001270170001[published Online First: Epub Date] |.
19. Fleury M-J, Grenier G, Caron J, et al. Patients' report of help provided by relatives and services to meet their needs. *Community Mental Health Journal* 2008;**44**(4):271-81
20. Norman RM, Malla AK, Manchanda R, et al. Social support and three-year symptom and admission outcomes for first episode psychosis. *Schizophrenia Research* 2005;**80**(2):227-34
21. Tempier R, Balbuena L, Lepnurm M, et al. Perceived emotional support in remission: results from an 18-month follow-up of patients with early episode psychosis. *Social Psychiatry and Psychiatric Epidemiology* 2013;**48**(12):1897-904
22. Murray-Swank AB, Dixon L. Family psychoeducation as an evidence-based practice. *Cns Spectrums* 2004
23. Pfammatter M, Junghan UM, Brenner HD. Efficacy of psychological therapy in schizophrenia: Conclusions from meta-analyses. *Schizophrenia Bulletin* 2006;**32**:S64-S80 doi: 10.1093/schbul/sb1030[published Online First: Epub Date] |.
24. Pharoah F, Mari J, Rathbone J, et al. Family intervention for schizophrenia. *Cochrane database of systematic reviews (Online)* 2010;**12**:CD000088
25. Pitschel-Walz G, Leucht S, Bäuml J, et al. The effect of family interventions on relapse and rehospitalization in schizophrenia: a meta-analysis. *FOCUS: The Journal of Lifelong Learning in Psychiatry* 2004;**2**(1):78-94

- 1 26. Pilling S, Bebbington P, Kuipers E, et al. Psychological treatments in schizophrenia: I. Meta-analysis of family  
2 intervention and cognitive behaviour therapy. *Psychological Medicine* 2002;**32**(5):763-82
- 3 27. National Collaborating Centre for Mental Health. Schizophrenia: core interventions in the treatment and  
4 management of schizophrenia in primary and secondary care (update): British Psychological Society, 2009.
- 5 28. Marshall M, Rathbone J. Early intervention for psychosis. *Cochrane Database of Systematic Reviews*  
6 2011(6):CD004718-NaN
- 7 29. Lucksted A, McFarlane W, Downing D, et al. Recent developments in family psychoeducation as an  
8 evidence-based practice. *Journal of Marital and Family Therapy* 2012;**38**(1):101-21
- 9 30. Cleary M, Freeman A, Hunt GE, et al. What patients and carers want to know: an exploration of information and  
10 resource needs in adult mental health services. *Australian and New Zealand Journal of Psychiatry*  
11 2005;**39**(6):507-13 doi: 10.1080/j.1440-1614.2005.01611.x[published Online First: Epub Date]].
- 12 31. Jubb M, Shanley E. Family involvement: The key to opening locked wards and closed minds. *International Journal*  
13 *of Mental Health Nursing* 2002;**11**(1):47-53
- 14 32. O'Brien L, Cole R. Mental health nursing practice in acute psychiatric close-observation areas. *International*  
15 *Journal of Mental Health Nursing* 2004;**13**(2):89-99
- 16 33. Rose LE, Mallinson RK, Walton-Moss B. Barriers to family care in psychiatric settings. *Journal of Nursing*  
17 *Scholarship* 2004;**36**(1):39-47
- 18 34. Longo S, Scior K. In-patient psychiatric care for individuals with intellectual disabilities: the service users' and  
19 carers' perspectives. *Journal of Mental Health* 2004;**13**(2):211-21
- 20 35. Hodgson O, King R, Leggatt M. Carers of mentally ill people in Queensland: Their perceived relationships with  
21 professional mental health service providers: Report on a survey. *Advances in Mental Health* 2002;**1**(3):220-  
22 34
- 23 36. Lammers J, Happell B. Mental health reforms and their impact on consumer and carer participation: a  
24 perspective from Victoria, Australia. *Issues in Mental Health Nursing* 2004;**25**(3):261-76
- 25 37. Keeley B, Clarke M. *Carers speak out project: report on findings and recommendations*: Princess Royal Trust for  
26 Carers London, 2002.
- 27 38. Wilkinson C, McAndrew S. 'I'm not an outsider, I'm his mother!' A phenomenological enquiry into carer  
28 experiences of exclusion from acute psychiatric settings. *International Journal of Mental Health Nursing*  
29 2008;**17**(6):392-401 doi: 10.1111/j.1447-0349.2008.00574.x[published Online First: Epub Date]].
- 30 39. Askey R, Holmshaw J, Gamble C, et al. What do carers of people with psychosis need from mental health  
31 services? Exploring the views of carers, service users and professionals. *Journal of Family Therapy*  
32 2009;**31**(3):310-31
- 33 40. Pinfold V, Corry P. Who cares? The experiences of mental health carers accessing services and information.  
34 Kingston-upon-Thames: Rethink 2003
- 35 41. Pinfold V, Farmer P, Rapaport J, et al. Positive and inclusive. Effective Ways for Professionals to Involve Carers in  
36 Information Sharing. Report to the National Co-ordinating Centre for NHS Service Delivery and Organisation  
37 R & D (NCCSDO) 2004
- 38 42. Repper J, Grant G, Nolan M, et al. Carers' views on, and experiences of mental health services and carer  
39 assessments: the results of a consultation exercise. Partnerships in Carer Assessment Project. School of  
40 Nursing and Midwifery, University of Sheffield 2005
- 41 43. Walsh J, Boyle J. Improving acute psychiatric hospital services according to inpatient experiences. A user-led  
42 piece of research as a means to empowerment. *Issues in Mental Health Nursing* 2009;**30**(1):31-38
- 43 44. Rethink. Who Cares? The Experience of Mental Health Carers Accessing Services and Information. London:  
44 Rethink Publications, 2003.
- 45 45. Glynn SM. Family interventions in schizophrenia: Promise and pitfalls over 30 years. *Current Psychiatry Reports*  
46 2012;**14**(3):237-43
- 47 46. Dixon L, McFarlane WR, Lefley H, et al. Evidence-based practices for services to families of people with  
48 psychiatric disabilities. *Psychiatric Services* 2001;**52**(7):903-10
- 49 47. Berry K, Haddock G. The implementation of the NICE guidelines for schizophrenia: Barriers to the implementation  
50 of psychological interventions and recommendations for the future. *Psychology and Psychotherapy-Theory*  
51 *Research and Practice* 2008;**81**:419-36 doi: 10.1348/147608308x329540[published Online First: Epub Date]].
- 52 48. Kim H, Salyers MP. Attitudes and perceived barriers to working with families of persons with severe mental  
53 illness: mental health professionals' perspectives. *Community Mental Health Journal* 2008;**44**(5):337-46
- 54 49. Cohen A, Glynn S, Murray-Swank A, et al. The Family Forum: directions for the implementation of family  
55 psychoeducation for severe mental illness. *Psychiatric Services* 2008;**59**(1):40-48



50. Glynn SM, Cohen AN, Dixon LB, et al. The potential impact of the recovery movement on family interventions for schizophrenia: opportunities and obstacles. *Schizophrenia Bulletin* 2006;**32**(3):451-63
51. Prytys M, Garety P, Jolley S, et al. Implementing the NICE guideline for schizophrenia recommendations for psychological therapies: a qualitative analysis of the attitudes of CMHT staff. *Clinical Psychology & Psychotherapy* 2011;**18**(1):48-59
52. Simpson E, House A. User and carer involvement in mental health services: from rhetoric to science. *The British Journal of Psychiatry* 2003;**183**(2):89-91
53. Slade M, Pinfold V, Rapaport J, et al. Best practice when service users do not consent to sharing information with carers National multimethod study. *The British Journal of Psychiatry* 2007;**190**(2):148-55
54. Mairs H, Bradshaw T. Implementing family intervention following training: what can the matter be? *Journal of Psychiatric and Mental Health Nursing* 2005;**12**(4):488-94
55. Popay J, Roberts H, Sowden A, et al. Guidance on the conduct of narrative synthesis in systematic reviews. A product from the ESRC Methods Programme. Version 2006;**1**
56. Mays N, Pope C, Popay J. Systematically reviewing qualitative and quantitative evidence to inform management and policy-making in the health field. *Journal of Health Services Research & Policy* 2005;**10**(suppl 1):6-20
57. Barnett-Page E, Thomas J. Methods for the synthesis of qualitative research: a critical review. *Bmc Medical Research Methodology* 2009;**9**(1):59
58. Dixon-Woods M, Agarwal S, Jones D, et al. Synthesising qualitative and quantitative evidence: a review of possible methods. *Journal of Health Services Research & Policy* 2005;**10**(1):45-53B
59. Thomas J, Harden A. Methods for the thematic synthesis of qualitative research in systematic reviews. *Bmc Medical Research Methodology* 2008;**8**(1):45
60. Braun V, Clarke V. Using thematic analysis in psychology. *Qualitative research in psychology* 2006;**3**(2):77-101
61. Clark J. How to peer review a qualitative manuscript. *Peer review in health sciences* 2003;**2**:219-35
62. Brent BK, Giuliano AJ. Psychotic-spectrum illness and family-based treatments: A case-based illustration of the underuse of family interventions. *Harvard Review of Psychiatry* 2007;**15**(4):161-68
63. Fadden G. Overcoming Barriers to Staff Offering Family Interventions in the NHS. A Casebook of Family Interventions for Psychosis 2009:309
64. Fadden G, Birchwood M, Lefley H, et al. British models for expanding family psychoeducation in routine practice. *Family Interventions in Mental Illness: International Perspectives*. Praeger, Westport, CT 2002:25-41
65. Brennan G, Gamble C. Schizophrenia family work and clinical practice. *MENTAL HEALTH NURSING-LONDON-COMMUNITY PSYCHIATRIC NURSES ASSOCIATION* 1997;**17**:12-16
66. Brooker C, Butterworth C. Working with families caring for a relative with schizophrenia: the evolving role of the community psychiatric nurse. *International Journal of Nursing Studies* 1991;**28**(2):189-200
67. Del Vecchio V, Luciano M, Malangone C, et al. Implementing family psychoeducational intervention for bipolar I disorder in 17 Italian Mental Health Centres. *Giornale Italiano di Psicopatologia / Italian Journal of Psychopathology* 2011;**17**(3):277-82
68. Butler MP, Begley M, Parahoo K, et al. Getting psychosocial interventions into mental health nursing practice: a survey of skill use and perceived benefits to service users. *Journal of Advanced Nursing* 2014;**70**(4):866-77 doi: 10.1111/jan.12248[published Online First: Epub Date]].
69. Goudreau J, Duhamel F, Ricard N. The impact of a family systems nursing educational program on the practice of psychiatric nurses - A pilot study. *Journal of Family Nursing* 2006;**12**(3):292-306 doi: 10.1177/1074840706291694[published Online First: Epub Date]].
70. Peters S, Pontin E, Lobban F, et al. Involving relatives in relapse prevention for bipolar disorder: a multi-perspective qualitative study of value and barriers. *Bmc Psychiatry* 2011. <http://onlinelibrary.wiley.com/o/cochrane/clcentral/articles/341/CN-00851341/frame.html>.
71. James C, Cushway D, Fadden G. What works in engagement of families in behavioural family therapy? A positive model from the therapist perspective. *Journal of Mental Health* 2006;**15**(3):355-69
72. Kelly M, Galvin K. Does a cross-educational practice meeting assist Thorn graduates to implement psychosocial interventions into clinical practice? *Journal of Mental Health Training, Education and Practice*, The 2010;**5**(4):18-26
73. Haun MW, Kordy H, Ochs M, et al. Family systems psychiatry in an acute in-patient setting: the implementation and sustainability 5 years after its introduction. *Journal of Family Therapy* 2013;**35**(2):159-75 doi: 10.1111/j.1467-6427.2012.00586.x[published Online First: Epub Date]].
74. Seikkula J. When the boundary opens: family and hospital in co-evolution. *Journal of Family Therapy* 1994;**16**(4):401-14

- 1  
2  
3  
4  
5  
6  
7  
8  
9  
10  
11  
12  
13  
14  
15  
16  
17  
18  
19  
20  
21  
22  
23  
24  
25  
26  
27  
28  
29  
30  
31  
32  
33  
34  
35  
36  
37  
38  
39  
40  
41  
42  
43  
44  
45  
46  
47  
48  
49  
50  
51  
52  
53  
54  
55  
56  
57  
58  
59  
60
75. Allen J, Burbach F, Reibstein J. 'A different world' individuals' experience of an integrated family intervention for psychosis and its contribution to recovery. *Psychology & Psychotherapy: Theory, Research & Practice* 2013;**86**(2):212-28
  76. Allen RES, Read J. Integrated mental health care: practitioners' perspectives. *Australian and New Zealand Journal of Psychiatry* 1997;**31**(4):496-503 doi: 10.3109/00048679709065071[published Online First: Epub Date]].
  77. Baguley I, Butterworth A, Fahy K, et al. Bringing into clinical practice skills shown to be effective in research settings: A follow-up of 'Thorn Training' in psychosocial family interventions for psychosis. *Psychosis: Psychological approaches and their effectiveness*. London, England: Gaskell/Royal College of Psychiatrists; England, 2000:96-119.
  78. Bailey R, Burbach FR, Lea SJ. The ability of staff trained in family interventions to implement the approach in routine clinical practice. *Journal of Mental Health* 2003;**12**(2):131-42
  79. Bisnauth R. Report on an audit of Meriden Trainers October 2001, 2001.
  80. Cohen A, Glynn S, Young A, et al. Implementing family services at mental health clinics. *Journal of General Internal Medicine* 2010;**25**:S305-S06
  81. De La Higuera Romero J, Ramirez Ruiz RM. Implementation of family psycho-educational programs in clinical practice: Analysis of an experience. *Apuntes de Psicología* 2011;**29**(1):71-85
  82. Fadden G. Implementation of family interventions in routine clinical practice following staff training programs: a major cause for concern. *Journal of Mental Health* 1997;**6**(6):599-613
  83. Kavanagh DJ, Clark D, Manicavasagar V, et al. APPLICATION OF COGNITIVE-BEHAVIORAL FAMILY INTERVENTION FOR SCHIZOPHRENIA IN MULTIDISCIPLINARY TEAMS - WHAT CAN THE MATTER BE. *Australian Psychologist* 1993;**28**(3):181-88 doi: 10.1080/00050069308258899[published Online First: Epub Date]].
  84. Magliano L, Fiorillo A, Fadden G, et al. Effectiveness of a psychoeducational intervention for families of patients with schizophrenia: preliminary results of a study funded by the European Commission. *World Psychiatry* 2005;**4**(1):45
  85. Magliano L, Fiorillo A, Malangone C, et al. Implementing psychoeducational interventions in Italy for patients with schizophrenia and their families. *Psychiatric Services* 2006;**57**(2):266-70
  86. Michie S, Pilling S, Garety P, et al. Difficulties implementing a mental health guideline: an exploratory investigation using psychological theory. *Implementation Science* 2007;**2** doi: 10.1186/1748-5908-2-8[published Online First: Epub Date]].
  87. Murphy N. Development of family interventions: a 9-month pilot study. *British Journal of Nursing* 2007;**16**(15):948
  88. Balaji M, Chatterjee S, Koschorke M, et al. The development of a lay health worker delivered collaborative community based intervention for people with schizophrenia in India. *Bmc Health Services Research* 2012;**12**:42
  89. Campbell A. How was it for you? Families' experiences of receiving Behavioural Family Therapy. *Journal of Psychiatric and Mental Health Nursing* 2004;**11**(3):261-67
  90. Stanbridge RI, Burbach FR, Lucas AS, et al. A study of families' satisfaction with a family interventions in psychosis service in Somerset. *Journal of Family Therapy* 2003;**25**(2):181-204 doi: 10.1111/1467-6427.00243[published Online First: Epub Date]].
  91. Hudson BL. Behavioural social work with schizophrenic patients in the community. *British Journal of Social Work* 1978;**8**(2):159-70
  92. Murphy N, Withnell N. Assessing the impact of delivering family interventions training modules: findings of a small-scale study. *Mental Health Nursing* 2013;**33**(5)
  93. Hughes I, Hailwood R, Abbati-Yeoman J, et al. Developing a family intervention service for serious mental illness: clinical observations and experiences. *Journal of Mental Health* 1996;**5**(2):145-60
  94. Building family skills together: An implementation strategy for evidence-based family interventions in public mental health services; 2008. Sydney: The MHS Conference Inc.
  95. Piippo J, Aaltonen J. Mental health and creating safety: the participation of relatives in psychiatric treatment and its significance. *Journal of Clinical Nursing* 2009;**18**(14):2003-12
  96. Seikkula J, Alakare B, Aaltonen J. Open dialogue in psychosis II: A comparison of good and poor outcome cases. *Journal of Constructivist Psychology* 2001;**14**(4):267-84 doi: 10.1080/107205301750433405[published Online First: Epub Date]].
  97. Forrest S, Masters H, Milne V. Evaluating the impact of training in psychosocial interventions: a stakeholder approach to evaluation—part II. *Journal of Psychiatric and Mental Health Nursing* 2004;**11**(2):202-12

- 1  
2  
3  
4  
5  
6  
7  
8  
9  
10  
11  
12  
13  
14  
15  
16  
17  
18  
19  
20  
21  
22  
23  
24  
25  
26  
27  
28  
29  
30  
31  
32  
33  
34  
35  
36  
37  
38  
39  
40  
41  
42  
43  
44  
45  
46  
47  
48  
49  
50  
51  
52  
53  
54  
55  
56  
57  
58  
59  
60
98. Seikkula J, Aaltonen J, Alakare B, et al. Five-year experience of first-episode nonaffective psychosis in open-dialogue approach: Treatment principles, follow-up outcomes, and two case studies. *Psychotherapy Research* 2006;**16**(2):214-28 doi: 10.1080/10503300500268490[published Online First: Epub Date].
  99. Seikkula J, Alakare B, Aaltonen J. Open dialogue in psychosis I: An introduction and case illustration. *Journal of Constructivist Psychology* 2001;**14**(4):247-65 doi: 10.1080/107205301750433397[published Online First: Epub Date].
  100. O'Neill M, Moore K, Ryan A. Exploring the role and perspectives of mental health nurse practitioners following psychosocial interventions training. *Journal of Psychiatric and Mental Health Nursing* 2008;**15**(7):582-87
  101. Budd RJ, Hughes IC. What do relatives of people with schizophrenia find helpful about family intervention? *Schizophrenia Bulletin* 1997;**23**(2):341
  102. Viljoen D, Boyd J. Service user views: Promoting a systemic therapy service in adult mental health. *Clinical Psychology Forum* 2005(152):13-16
  103. Piippo J, Aaltonen J. Mental health: integrated network and family-oriented model for co-operation between mental health patients, adult mental health services and social services. *Journal of Clinical Nursing* 2004;**13**(7):876-85
  104. Tompson MC, Rea MM, Goldstein MJ, et al. Difficulty in implementing a family intervention for bipolar disorder: the predictive role of patient and family attributes. *Family Process* 2000; (1).  
<http://onlinelibrary.wiley.com/o/cochrane/clcentral/articles/892/CN-00557892/frame.html>.
  105. Fixsen DL, Blase KA, Naoom SF, et al. Core implementation components. *Research on Social Work Practice* 2009;**19**(5):531-40
  106. Edmondson AC, Bohmer RM, Pisano GP. Disrupted routines: Team learning and new technology implementation in hospitals. *Administrative Science Quarterly* 2001;**46**(4):685-716
  107. Edmondson AC. Learning from failure in health care: frequent opportunities, pervasive barriers. *Quality and Safety in Health Care* 2004;**13**(suppl 2):ii3-ii9
  108. Aarons G. Transformational and transactional leadership: Association with attitudes toward evidence-based practice. *Psychiatric Services* 2006;**57**(8):1162-69
  109. Glisson C, James LR. The cross-level effects of culture and climate in human service teams. *Journal of Organizational Behavior* 2002;**23**(6):767-94
  110. Klein KJ, Sorra JS. The challenge of innovation implementation. *Academy of management review* 1996;**21**(4):1055-80
  111. Wynne LC. The rationale for consultation with the families of schizophrenic patients. *Acta Psychiatrica Scandinavica* 1994;**90**(s384):125-32
  112. Winefield HR. Barriers to an alliance between family and professional caregivers in chronic schizophrenia. *Journal of Mental Health* 1996;**5**(3):223-32

## Figures & Table Legends

**Figure 1.** PRISMA flow diagram for paper selection

**Figure 2.** Barriers, problems and facilitators to family work. Summary of themes

**Supplementary File 1.** Protocol for Systematic Review

**Supplementary File 2.** Modified database search strategies

**Supplementary File 3.** Characteristics of included studies (n=43)



Fig.1 PRISMA flow diagram for paper selection

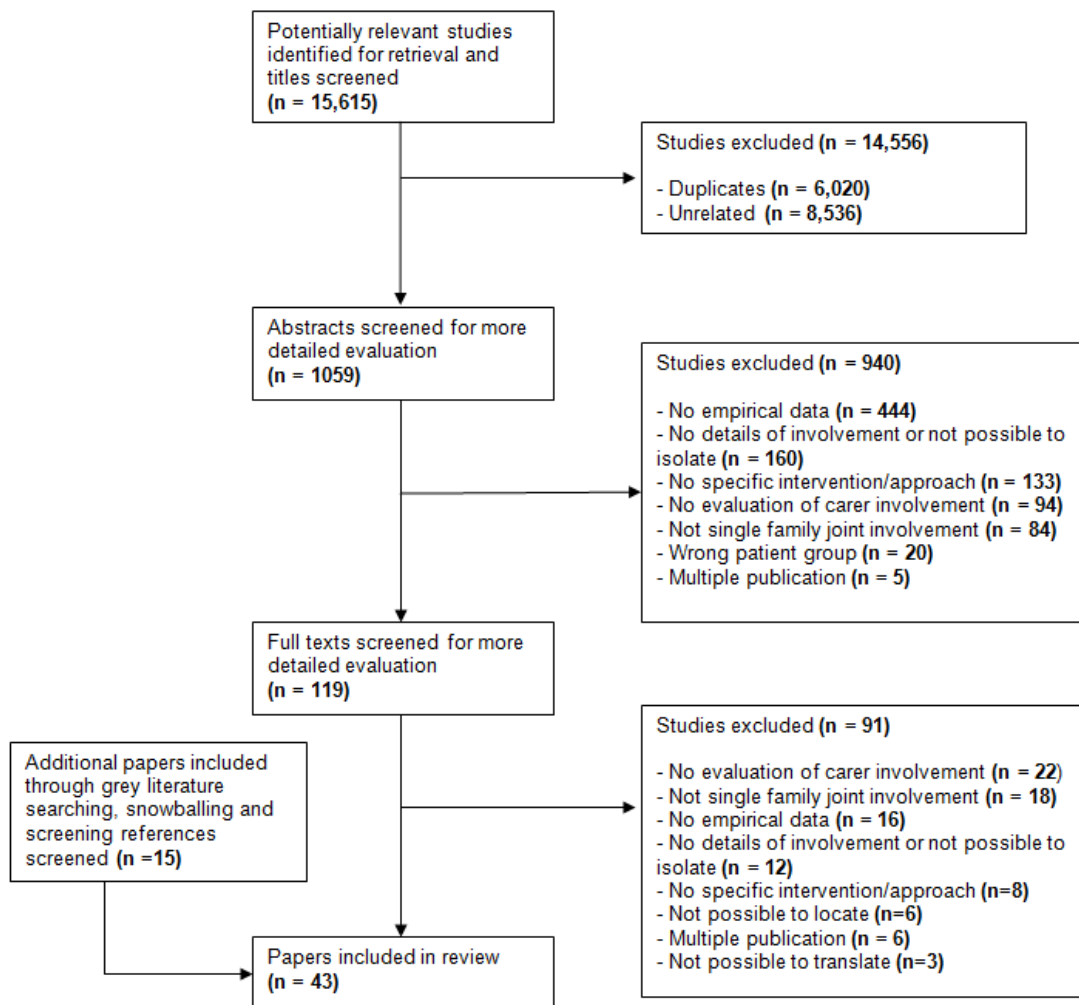

only

Figure 2. Barriers, problems and facilitators to family work. Summary of themes

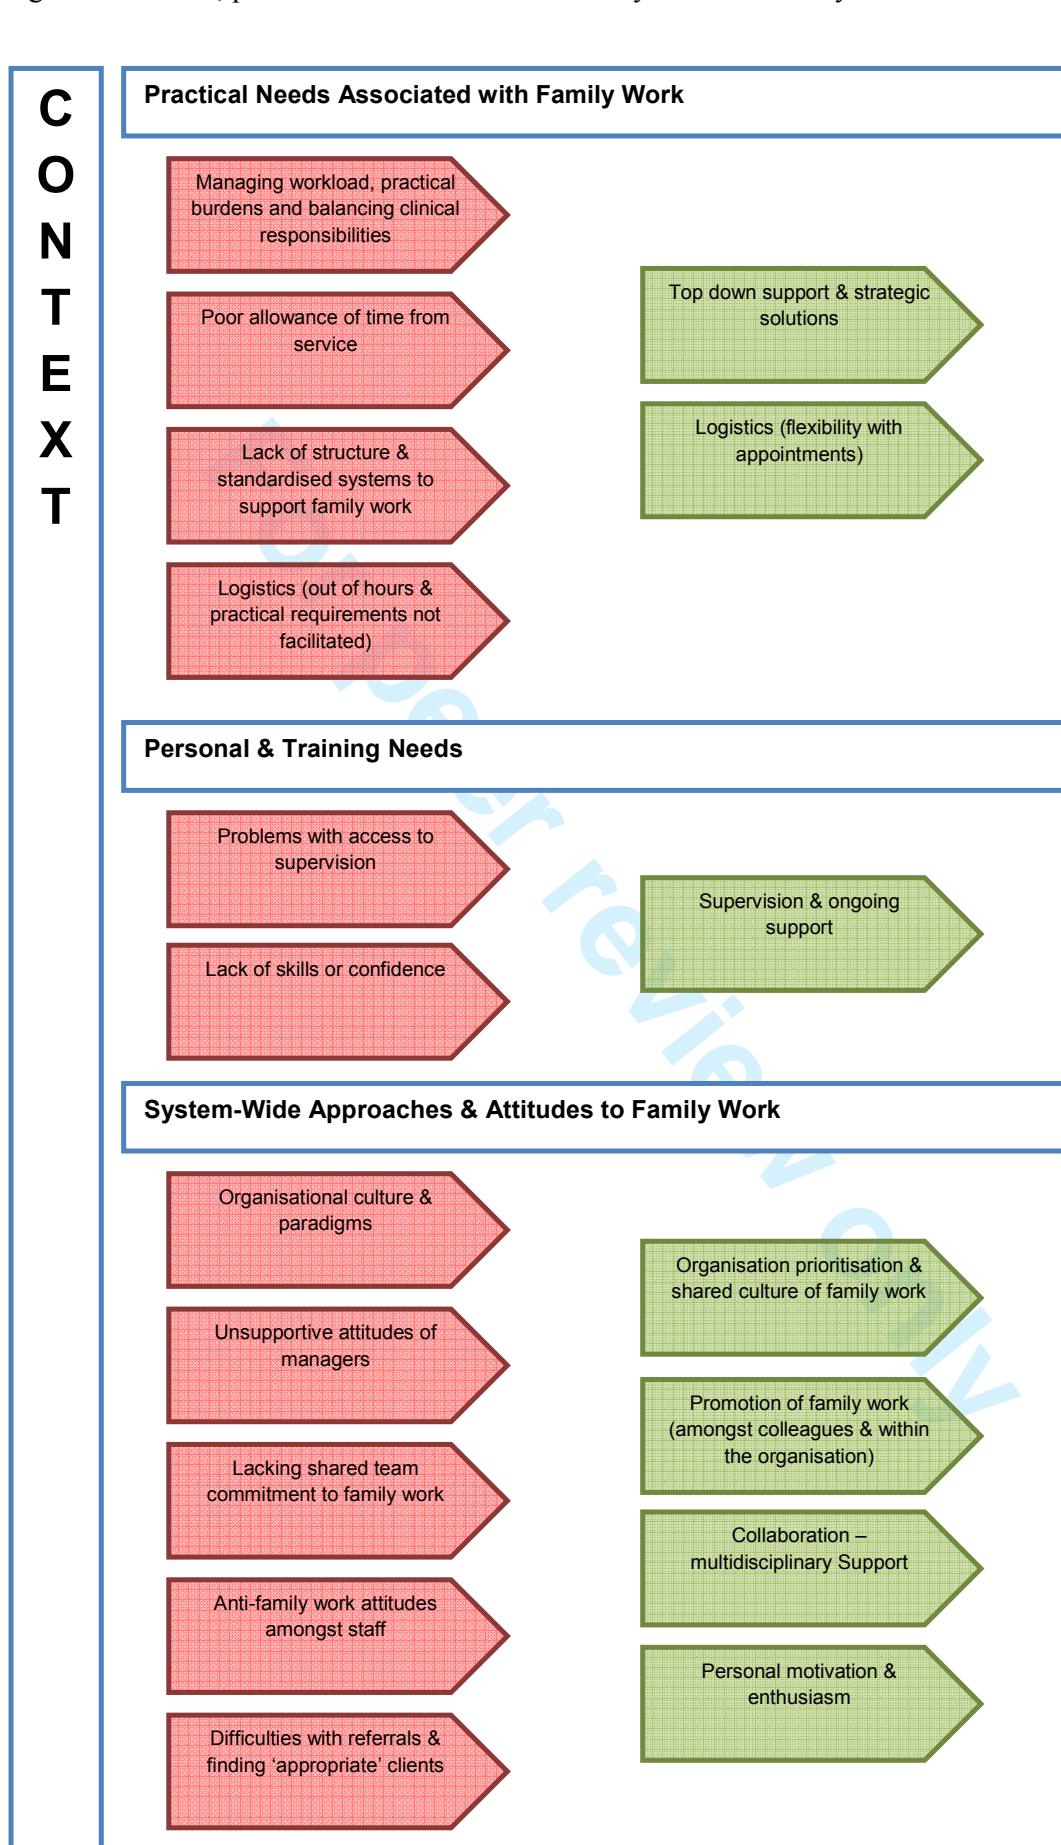

1  
2  
3  
4  
5  
6  
7  
8  
9  
10  
11  
12  
13  
14  
15  
16  
17  
18  
19  
20  
21  
22  
23  
24  
25  
26  
27  
28  
29  
30  
31  
32  
33  
34  
35  
36  
37  
38  
39  
40  
41  
42  
43  
44  
45  
46  
47  
48  
49  
50  
51  
52  
53  
54  
55  
56  
57  
58  
59  
60

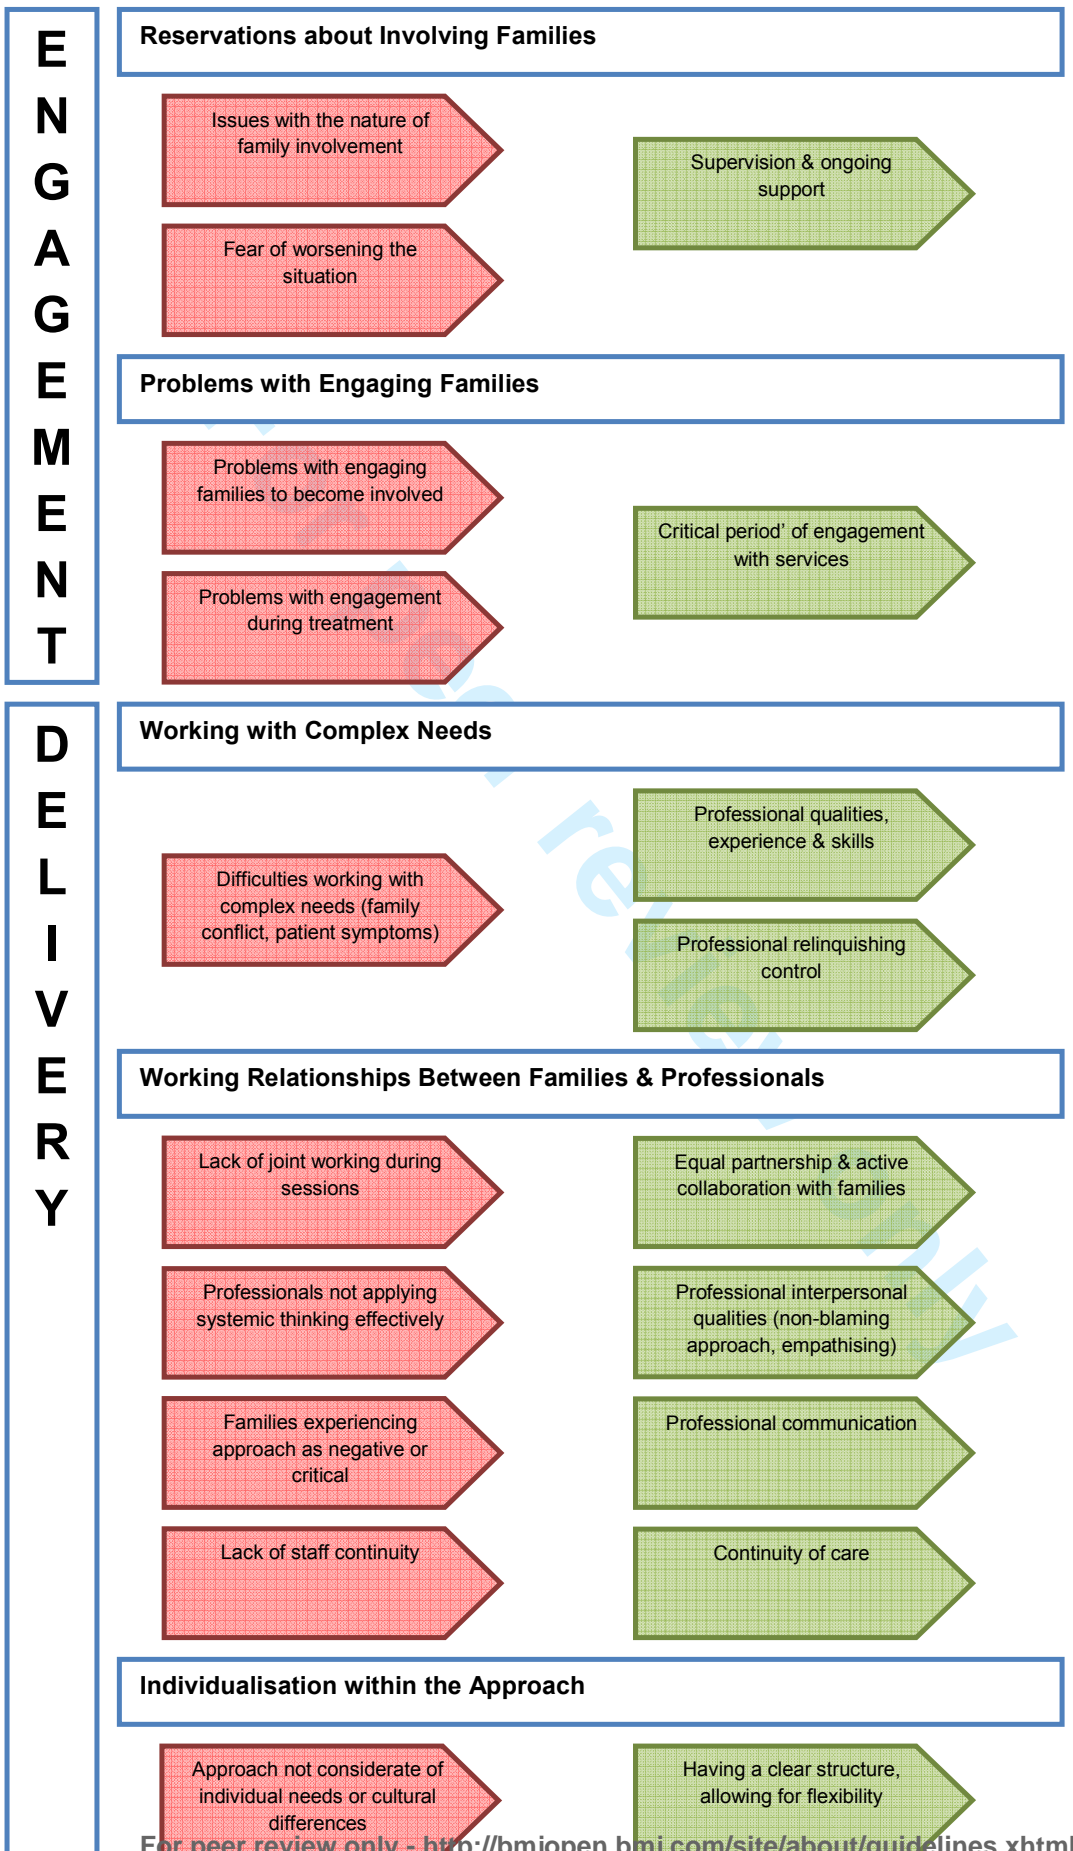

## Supplementary file: Protocol for a Systematic Review

### **Implementing family involvement in treatment of psychosis: A Systematic Review of facilitators and hindering factors**

Domenico Giacco, Erica Eassom & Stefan Priebe

#### **Background and rationale for a review**

Due to the move of psychiatric care from hospitals to community, nowadays informal caregivers (i.e. family or friends) have taken some functions performed in the past by psychiatric institutions. Consequently, "informal care" plays a significant role in development and evaluation of health programs and policies (Clark & Drake, 1994; Simpson, 2008; Caqueo-Urizar et al., 2009).

An estimated 40-50% of almost six million carers in the United Kingdom provide care for another family member or friend with a mental health problem (Office for National Statistics 2003). In particular, it has been estimated that carers of people with schizophrenia save the public purse £1.24 billion per year (Schizophrenia Commission Report, 2012).

Many psychiatric policies and guidelines stipulate that families should be supported and actively involved in psychiatric treatment (Department of Health, 2006; National Institute of Mental Health in England, 2004; NICE, 2011). The Schizophrenia Commission Report (2012) states that "Services need to make a fundamental reappraisal of how they treat families and put them at the centre of their thinking and practice". This document also emphasizes that "carers are seen as resource, experts, partners in care". Recent evidence from large scale European and UK studies has documented that relatives wish to be more involved in the care of their ill relatives, also during acute phases of their illness (Jankovic et al., 2011; Giacco et al., 2012).

Family involvement in treatment is often seen as intrinsically worthwhile; however some positive consequences in terms of patients' outcomes and patients and families' satisfaction with treatments have also been hypothesized (Simpson and House, 2003).

However, a number of barriers to family involvement in treatment and problems in its implementation in routine practice have been also identified (Simpson and House, 2003) such as: danger of increasing burden related to caregiving, role strain, lack of experience and/or interest. Also, specific problems may arise in different phases of the illness (e.g. when the patient is acutely ill and requires involuntary treatment).

This study will systematically review the available studies exploring carers' involvement in routine psychiatric treatment. Assessing barriers, problems and facilitators related to family involvement will help better define and implement family involvement in clinical practice.

#### **Research questions**

The review will aim at answering the following research questions:

1. What are the barriers that may prevent family involvement?
2. What are the problems that may arise during implementation of family involvement?

1  
2  
3  
4 3. What are the facilitators of family involvement?  
5  
6

7 The different perspectives of patients, their family members and staff will be assessed.  
8  
9

10  
11 **Selection criteria**  
12

13 1) Study type

14 Conducted in general public mental health services  
15 Any type of study design (qualitative, quantitative and mixed)  
16 Published in Latin script  
17

18 2) Participants  
19

20 Patients

21 People with psychotic disorders (F20-29 and F31 according to ICD-10)  
22 Age 18-65/ any gender/nationality  
23

24 Family/Carers

25 Family and informal (i.e. non-professional) carers: relatives, friends, others  
26 Any age /gender/nationality  
27 Either main carer (i.e. spending most time with the patient) or other carers  
28

29 Staff

30 Any mental health professional (psychiatrists, psychologists, nurses, social workers,  
31 care coordinators, occupational therapists)  
32  
33

34  
35 3) Family involvement

36 Explicit description of family involvement (i.e. information, support, involvement in  
37 decision making, preparation of crisis plans, etc.)  
38 Assessment of carer's involvement through assessment of barriers or problems or  
39 facilitators or feasibility  
40

41 Exclusion criteria

- 42 1) Studies assessing family involvement in planning of services will be excluded  
43 2) Studies not reporting clear information on how family involvement was implemented  
44 (services' catchment area, description of activities, i.e. information, support,  
45 involvement in decision making, preparation of crisis plans, etc.)  
46 3) Studies into general experience, opinions, satisfaction or needs, unless related to a  
47 clearly described carer involvement in treatment  
48 4) Studies reporting on therapy for the family or group psychoeducation, i.e. the carer  
49 involvement will have to be in the context of the treatment of an individual patient  
50  
51

52  
53  
54 **Methods**  
55

56 In order to gather relevant literature, electronic searches of electronic databases will take  
57 place. In addition, the articles included as references in the review papers found will be hand  
58 searched too.  
59  
60

Databases to be searched include:

- BNI
- CINAL
- EMBASE
- MEDLINE
- PsychINFO
- CENTRAL
- AMED
- Social Sciences Citations in Web of Knowledge

Hand searching of review articles on the topic and of included studies

Grey literature will also be searched, including:

- Dissertations/PhDs
- Contacting authors in the field
- Forward and backward snowballing related to citations

The abstracts of the papers identified will be examined to determine papers potentially relevant to the review. Based on this initial screening, selected full-text articles will be obtained for a second-stage screening. Studies will be included and submitted for data extraction if they specifically address family involvement in the treatment of patients with psychosis and if the tasks in which the family is involved are specifically described.

### Extraction process

Search terms will be a mixture of family/carers' involvement descriptors, psychosis descriptors and outcomes.

| <b>Family/Carers' involvement descriptors</b> | <b>Psychosis descriptors</b> | <b>Outcome descriptors</b>  |              |
|-----------------------------------------------|------------------------------|-----------------------------|--------------|
| Carers                                        | Psychosis                    | Clinical outcomes           | Experiences  |
| Caregivers                                    | Schizophrenia                | Symptoms                    | Benefits     |
| Relatives                                     | Psychotic disorders          | Hospitalizations            | Rewards      |
| Friends                                       | Schizoaffective disorder     | Quality of life             | Failures     |
| Family support                                | Schizophreniform disorder    | Adherence                   | Challenges   |
| Family burden                                 | Severe mental illness        | Satisfaction with treatment | Difficulties |
| Involvement                                   | Acute phase                  | Care                        | Barriers     |
| Social support                                | Crisis                       | Satisfaction                | Stress       |

|                             |  |                      |             |
|-----------------------------|--|----------------------|-------------|
|                             |  |                      |             |
| Practical support           |  | Experiences          | Empowerment |
| Inpatient treatment         |  | Service provision    |             |
| Outpatient treatment        |  | Psychiatric services |             |
| Involuntary hospitalization |  | Opinions             |             |
| Psychoeducation             |  | Attitude             |             |

## References

1. Clark RE, Drake RE. Expenditures of time and money by families of people with severe mental illness and substance use disorders. *Community Ment Health Journal* 1994;30:145-63.
2. Simpson A. Working in partnership with families must form part of mental health nurse training. *Nursing Times* 2008;104:16.
3. Caqueo-Úrizar A, Gutiérrez-Maldonado J, Miranda-Castillo C. Quality of life in caregivers of patients with schizophrenia: a literature review. *Health and Quality of Life Outcomes* 2009; 11;7:84
4. Office for National Statistics (2003) Census 2001. National report for England and Wales. London: The Stationery Office.
5. Schizophrenia Commission (Rethink). The abandoned illness: a report from Schizophrenia Commission. Available at: [www.rethink.org](http://www.rethink.org)
6. Jankovic J, Yeeles K, Katsakou C, Amos T, Morriss R, Rose D, Nichol P, McCabe R, Priebe S. Family caregivers' experiences of involuntary psychiatric hospital admissions of their relatives--a qualitative study. *PLoS One*. 2011;6:e25425.
7. Giacco D, Fiorillo A, Del Vecchio V, Kallert T, Onchev G, Raboch J, Mastrogianni A, Nawka A, Hadrys T, Kjellin L, Luciano M, De Rosa C, Maj M, Priebe S. Caregivers' appraisals of patients' involuntary hospital treatment: European multicentre study. *British Journal of Psychiatry*. 2012;201:486-91.
8. Department of Health. From values to action: The Chief Nursing Officer.s review of mental health nursing. London, Department of Health, 2006.
9. National Institute of Mental Health in England. Guiding Statement on Recovery. London, NIMHE, 2005. <http://www.psychminded.co.uk/news/news2005/feb05/nimherecovstatement.pdf>
10. National Institute for Clinical Excellence. Schizophrenia - Core interventions in the treatment and management of schizophrenia in adults in primary and secondary care. NICE, 2011.
11. Simpson EL, House A.O. User and carer involvement in mental health services: from rhetoric to science. *British Journal of Psychiatry* 2003, 183:89-91.



## Supplementary File. Modified database search strategies

**EMBASE/MEDLINE/PSYCHINFO/AMED via Ovid**

1. exp schizophrenia/ or exp psychosis/
2. 1 use emez
3. exp schizophrenia/ or exp psychotic disorders/
4. 3 use mesz
5. exp psychosis/ or schizoaffective disorder/
6. 5 use psyh
7. exp bipolar disorder/
8. (psychos#s or psychotic or schizo\$ or bipolar disorder).ti,ab.
9. ((chronic\$ or serious or severe\$) adj (mental\$ or psychological\$ or psychiatric) adj (disorder\$ or ill\$ or health or problem\$)).mp.
10. Or/2,4,6-9
11. ((famil\* adj2 therapy) or family psychiatry or family psychotherapy or family counselling or family work or family treatment or family intervention or family management or family approach\$).mp.  
[mp=ti, ab, sh, hw, tn, ot, dm, mf, dv, kw, nm, kf, ps, rs, ui, tc, id, tm]
12. ((carer or caregiver\$ or relative\$ or friend\$ or family or families) adj2 (partner\$ or work\$ with or support\$)).mp.
13. ((carer\$ or caregiver\$ or relative\$ or friend\$ or family or families) adj5 (program\$ or psychoeducation\$ or integrate\$ or train\$ or inform\$ or service\$ or intervention\$ or initiative\$ or psychosocial)).mp
14. ((carer\$ or caregiver\$ or relative\$ or friend\$ or family or families) adj (involv\$ or inclu\$)).mp.
15. or/11-14
16. (benefit\$ or advantage\$ or success\$ or fail\$ or problem\$ or disadvantage\$ or challenge\$ or barrier\$ or difficult\$ or issue\$ or experience\$ or satisf\$ or evaluat\$ or obstacle\$).ti,ab.
17. 10 and 15 and 16

**BNI/CINAHL via HILO**

1. (psychos?s OR psychotic OR schizoaff\* OR schizophr\* OR "bipolar disorder" OR "manic depression" OR "severe\* mental\* ill\*" OR "severe\* mental\* disorder\*" OR "serious\* mental\* ill\*" OR "serious\* mental\* disorder\*" OR "severe mental health" OR "serious mental health").ti,ab
2. ("family therapy" OR "family psychiatry" OR "family psychotherapy" OR "family counselling" OR "family work" OR "family treatment" OR "family intervention" OR "family management" OR "family approach\*").ti,ab,mw,su
3. ((carer\* OR caregiver\* OR relative\* OR friend\* OR family OR families) AND (partner\* OR "work\* with" OR support\* OR program\* OR psychoeducation\* OR integrate\* OR train\* OR inform\* OR service\* OR intervention\* OR initiative\* OR psychosocial OR involv\* OR inclu\*)).ti,ab



- 1
- 2
- 3
4. 2 OR 3
- 4 5. (benefit\* OR advantage\* OR success\* OR fail\* OR problem\* OR disadvantage\* OR challenge\*  
5 6 OR barrier\* OR difficult\* OR issue\* OR experience\* OR satisf\* OR evaluat\* OR obstacle\*).ti,ab
- 7 6. 1 AND 4 AND 5
- 8
- 9
- 10

### 11 Social Sciences Citations Index via Web of Knowledge

- 12
- 13 1. TS=(psychosis OR psychoses OR psychotic OR schizoaff\* OR schizophr\* OR "bipolar disorder"  
14 OR "manic depression" OR "severe\* mental\* ill\*" OR "severe\* mental\* disorder\*" OR "serious\*  
15 mental\* ill\*" OR "serious\* mental\* disorder\*" OR "severe mental health" OR "serious mental health")
- 16
- 17 2. TS=("family therapy" OR "family psychiatry" OR "family psychotherapy" OR "family counselling" OR  
18 "family work" OR "family treatment" OR "family intervention" OR "family management" OR "family  
19 approach\*")
- 20
- 21 3. TS=((carer\* OR caregiver\* OR relative\* OR friend\* OR family OR families) AND (partner\* OR  
22 "work\* with" OR support\* OR program\* OR psychoeducation\* OR integrate\* OR train\* OR inform\* OR  
23 service\* OR intervention\* OR initiative\* OR psychosocial OR involv\* OR inclu\*))
- 24
- 25 4. #2 OR #3
- 26
- 27 5. TS=(benefit\* OR advantage\* OR success\* OR fail\* OR problem\* OR disadvantage\* OR challenge\*  
28 OR barrier\* OR difficult\* OR issue\* OR experience\* OR satisf\* OR evaluat\* OR obstacle\*)
- 29
- 30 6. #1 AND #4 AND #5

31 Refined by: [excluding] Research Areas NEUROSCIENCES NEUROLOGY OR PHARMACOLOGY  
32 PHARMACY OR GENERAL INTERNAL MEDICINE OR PEDIATRICS OR GERIATRICS

### 33 CDSR/DARE/CENTRAL via the Cochrane Library

- 34
- 35 1. . MeSH descriptor: [Schizophrenia] explode all trees
- 36 2. MeSH descriptor: [Psychotic Disorders] explode all trees
- 37 3. MeSH descriptor: [Bipolar Disorder] explode all trees
- 38 4. MeSH descriptor: [Affective Disorders, Psychotic] this term only
- 39 5. (chronic or serious or severe) next (mental or psychological or psychiatric) next (health or disorder  
40 or ill or problem) (Word variations have been searched)
- 41 6. Psychosis (Word variations have been searched)
- 42 7. {or #1-#6}
- 43
- 44
- 45
- 46
- 47
- 48
- 49
- 50
- 51
- 52
- 53
- 54
- 55
- 56
- 57
- 58
- 59
- 60

- 1
- 2
- 3 8. (family next therapy) or (family next psychiatry) or (family next psychotherapy) or (family next
- 4 counselling) or "family work" or (family next treatment) or (family next intervention) or "family
- 5 management" or "family approach\*" (Word variations have been searched)
- 6
- 7 9. (carer OR caregiver OR relative OR friend OR family) NEAR (partner OR "work\* with" OR support
- 8 OR program OR psychoeducation OR integrate OR train OR inform OR service OR intervention
- 9 OR initiative OR psychosocial OR involve OR include) (Word variations have been searched
- 10
- 11 10. benefit or advantage or success or fail or problem or disadvantage or challenge or barrier or
- 12 difficult or issue or experience or satisf\* or evaluate or obstacle)
- 13
- 14 11. #8 or #9
- 15 12. #7 and #10 and #11 in Cochrane Reviews (Reviews and Protocols), Other Reviews and Trials
- 16
- 17
- 18
- 19
- 20
- 21
- 22
- 23
- 24
- 25
- 26
- 27
- 28
- 29
- 30
- 31
- 32
- 33
- 34
- 35
- 36
- 37
- 38
- 39
- 40
- 41
- 42
- 43
- 44
- 45
- 46
- 47
- 48
- 49
- 50
- 51
- 52
- 53
- 54
- 55
- 56
- 57
- 58
- 59
- 60

Supplementary Table 1. Characteristics of included studies (n=43)

| Country of origin, language, year of publication | Published Form  | Principal objective of the study                                                                                                                                                                                                                                 | Operationalisation of family involvement                                                                                                                                                                                                                                                       | Type of psychiatric service                           | Study design eliciting barriers and facilitators | Participants data used in review                                                                                                                                        | Methods relevant to review                                                |
|--------------------------------------------------|-----------------|------------------------------------------------------------------------------------------------------------------------------------------------------------------------------------------------------------------------------------------------------------------|------------------------------------------------------------------------------------------------------------------------------------------------------------------------------------------------------------------------------------------------------------------------------------------------|-------------------------------------------------------|--------------------------------------------------|-------------------------------------------------------------------------------------------------------------------------------------------------------------------------|---------------------------------------------------------------------------|
| UK(England), English, 2013 [98]                  | Journal Article | To explore the meaning and significance of FI for the individual who experiences psychosis, and its significance for recovery.                                                                                                                                   | <b>Family Intervention.</b> 'Integrated Family Intervention'; 'S.T.E.P. Service' individual and family CBT with systemic perspective: psychoeducation, needs assessment for further FI: problem solving, behavioural goal setting, medication management, relapse management, skills training. | Specialised (Family Intervention Service), Outpatient | Cross-sectional, Qualitative                     | 7 individuals with experience of psychosis and the FI service: Diagnoses included schizophrenia, bipolar disorder, and severe depression                                | Semi-structured interviews                                                |
| New Zealand, English, 1997 [63]                  | Journal Article | To measure the implementation of the 'Integrated Mental Health Care' approach 1 year after training and explore barriers and benefits, and provide information about participants' perceptions and experiences.                                                  | <b>Family Intervention.</b> 'Integrated Mental Health Care' community-based approach influenced by the BFT model of Falloon and colleagues (F-BFT): needs assessment, psychoeducation, skills training.                                                                                        | General, Outpatient                                   | Cross-sectional, Mixed Methods                   | 11 CPNs, 7 community workers, 5 OTs, 3 SWs, 2 Managers, 1 Psychiatrist, 1 Psychiatric Registrar, 1 Activity Centre Coordinator, 1 Liaison Officer, 1 CP and 1 Therapist | a) Questionnaire (rating scale)<br>b) Semi-structured interviews          |
| UK (England), English, 2000 [64]                 | Book Chapter    | To investigate how FI had been integrated into former 'Thorn Course' trainees' routine work, examine the nature of any difficulties and determine if it's possible to predict which trainees would be more able to implement FI skills acquired during training. | <b>Family Intervention.</b> 'Psychosocial Family Interventions for psychosis': formulation driven, cognitive behavioural family approach: needs assessment, education, skills training.                                                                                                        | General, Inpatient & Outpatient                       | Cross-sectional, Mixed Methods                   | 16 community-based, 2 ward-based MHNs, 2 managers, 1 lecturer                                                                                                           | Questionnaire (rating scale & open ended responses)                       |
| UK (England), English, 2003 [65]                 | Journal Article | To examine the effectiveness of the 'FIRST' FI training programme and compare experiences of staff in Somerset with staff in previous studies.                                                                                                                   | <b>Family Intervention.</b> 'Psychosocial Family Interventions for psychosis' based on the 'S.T.E.P. Service' model: individual and family CBT with systemic perspective: needs assessment, education, skills training.                                                                        | General, Inpatient & Outpatient                       | Cross-sectional, Mixed Methods                   | 8 CPNs, 5 MHNs, 2 SWs, 1 Psychiatrist, 1 CP, 1 Art Therapist                                                                                                            | a) Questionnaire (rating scale & open ended responses)<br>b) Focus groups |
| India, English, 2012 [85]                        | Journal Article | To report on the researching, planning and delivery of a pilot of a community based intervention for people with schizophrenia and their carers, delivered by lay health workers.                                                                                | <b>Family Intervention.</b> Community-based intervention for people with schizophrenia and their families: weekly home based sessions, needs assessment, psycho-education, adherence management, rehabilitation, health promotion.                                                             | General, Outpatient                                   | Case Study                                       | N/A                                                                                                                                                                     | Descriptive account                                                       |
| UK (England),                                    | Un-published    | To examine the experiences of trainers on the 'Meriden - West Midlands Family                                                                                                                                                                                    | <b>Family Intervention.</b> 'Meriden Family Work Programme' based on F-BFT. 10 to 14                                                                                                                                                                                                           | General, Not                                          | Cross-sectional                                  | 42 Behavioural Family Therapy Trainers                                                                                                                                  | Structured written and phone                                              |

|    |               |          |                                             |                                                      |             |             |                             |                    |
|----|---------------|----------|---------------------------------------------|------------------------------------------------------|-------------|-------------|-----------------------------|--------------------|
| 1  |               |          |                                             |                                                      |             |             |                             |                    |
| 2  |               |          |                                             |                                                      |             |             |                             |                    |
| 3  | English,      | Audit    | Programme' programme, including             | sessions: psychoeducation, relapse planning,         | Reported    |             |                             | questionnaires     |
| 4  | 2001 [66]     |          | motivations, frustrations, benefits and     | skills training.                                     |             |             |                             | (open-ended        |
| 5  |               |          | support from being involved in Meriden.     |                                                      |             |             |                             | responses)         |
| 6  | UK            | Journal  | To establish the prevailing issues and      | <b>Family Intervention.</b> 'Schizophrenia Family    | General,    | Cross-      | 36 CPNs, 2 ward based       | Questionnaire      |
| 7  | (England),    | Article  | working practices of qualified Mental       | Work', based on F-BFT principles:                    | Inpatient & | sectional,  | MHNs                        | (rating & open-    |
| 8  | English,      |          | Health Nurses carrying out FI.              | psychoeducation, problem solving, skills             | Outpatient  | Mixed       |                             | ended response)    |
| 9  | 1997 [67]     |          |                                             | training.                                            |             | methods     |                             |                    |
| 10 | United        | Journal  | To discuss barriers to implementing FI in   | <b>Family Intervention.</b> 'Family focused evidence | General,    | Case Study  | N/A                         | a) Descriptive     |
| 11 | States,       | Article  | the treatment of psychotic-spectrum         | based treatment': psychoeducation, problem           | Inpatient & |             |                             | account            |
| 12 | English,      |          | illnesses, in both inpatient and outpatient | solving, skills training.                            | Outpatient  |             |                             | b) Case study      |
| 13 | 2007 [68]     |          | settings.                                   |                                                      |             |             |                             |                    |
| 14 | UK            | Journal  | To describe the effect on the role and      | <b>Family Intervention.</b> 'Psychosocial            | General,    | Cross-      | 18 CPNs                     | Questionnaire      |
| 15 | (England),    | Article  | function of the Community Psychiatric       | Intervention', based on F- BFT: needs                | Outpatient  | sectional   |                             | (rating & open-    |
| 16 | English,      |          | Nurse after training to deliver             | assessment, psychoeducation, skills training,        |             |             |                             | ended response)    |
| 17 | 1991 [69]     |          | psychosocial intervention to families       | problem-solving, medication compliance, crisis       |             |             |                             |                    |
| 18 |               |          | caring for a relative with schizophrenia    | planning, cognitive behavioural management           |             |             |                             |                    |
| 19 |               |          | living at home.                             | strategies.                                          |             |             |                             |                    |
| 20 | UK (Wales),   | Journal  | To investigate what carers found helpful    | <b>Family Intervention.</b> Based on the 'S.T.E.P.   | General,    | Cross-      | 20 relatives of people with | Semi-structured    |
| 21 | English,      | Article. | and unhelpful about the community-based     | Service' model of individual and family CBT          | Outpatient  | sectional,  | a diagnosis of              | interviews         |
| 22 | 1991 [101]    |          | FI programme.                               | with systemic perspective: psychoeducation;          |             | Qualitative | schizophrenia or            |                    |
| 23 |               |          |                                             | needs assessment for further FI: problem             |             |             | schizoaffective disorder    |                    |
| 24 |               |          |                                             | solving, behavioural goal setting, medication        |             |             |                             |                    |
| 25 |               |          |                                             | management, relapse management, skills               |             |             |                             |                    |
| 26 | UK (Ireland), | Journal  | To investigate participants' use of         | <b>Family Intervention.</b> 'Psychosocial            | General,    | Cross-      | 8 MHNs                      | Questionnaire      |
| 27 | English,      | Article  | PSI in clinical practice following          | Intervention', based on F- BFT: needs                | Inpatient & | sectional   |                             | (open-ended        |
| 28 | 2014 [83]     |          | postgraduate training.                      | assessment, psychoeducation, skills training,        | Outpatient  |             |                             | response)          |
| 29 |               |          |                                             | problem-solving, medication compliance, crisis       |             |             |                             |                    |
| 30 |               |          |                                             | planning, cognitive behavioural management           |             |             |                             |                    |
| 31 | UK            | Journal  | To describe the lived experiences of        | <b>Family Intervention.</b> 'Meriden Family Work     | General,    | Cross-      | 9 service users with a      | Semi-structured    |
| 32 | (England),    | Article  | families who had received the family        | Programme' based on F-BFT:                           | Outpatient  | sectional,  | diagnosis of severe         | family interviews  |
| 33 | English,      |          | intervention of BFT.                        | psychoeducation, skills training, relapse            |             | Qualitative | mental illness              |                    |
| 34 | 2004 [89]     |          |                                             | management, problem solving.                         |             |             | (schizophrenia, bipolar     |                    |
| 35 |               |          |                                             |                                                      |             |             | disorder, severe            |                    |
| 36 |               |          |                                             |                                                      |             |             | depression), 18 family      |                    |
| 37 | United        | Journal  | To study the implementation of an FI in     | <b>Family Intervention.</b> 'Psychoeducation &       | Specialised | Cross-      | 173 patients with a         | a) Questionnaire   |
| 38 | States,       | Article  | order to perform a process analysis of      | EQUIP (Enhancing Quality of Care in                  | (Veterans   | sectional,  | diagnosis of schizophrenia  | (ratings and open- |
| 39 | English,      |          | implementation and examine utilisation of   | Psychosis)': family outreach, needs                  | Affairs),   | Mixed       | or schizoaffective          | ended responses)   |
| 40 | 2010 [70]     |          | the intervention.                           | assessment and care coordination, medication         | Outpatient  | methods     | disorder; 18 clinicians     | b) Semi-structured |
| 41 |               |          |                                             | management, and optional further family              |             |             | (Psychiatrists and          | interviews.        |
| 42 |               |          |                                             | intervention.                                        |             |             | Psychiatry Residents)       |                    |
| 43 |               |          |                                             |                                                      |             |             |                             |                    |
| 44 |               |          |                                             |                                                      |             |             |                             |                    |
| 45 |               |          |                                             |                                                      |             |             |                             |                    |
| 46 |               |          |                                             |                                                      |             |             |                             |                    |
| 47 |               |          |                                             |                                                      |             |             |                             |                    |
| 48 |               |          |                                             |                                                      |             |             |                             |                    |
| 49 |               |          |                                             |                                                      |             |             |                             |                    |

|    |                 |            |                                              |                                                   |             |             |                           |                      |
|----|-----------------|------------|----------------------------------------------|---------------------------------------------------|-------------|-------------|---------------------------|----------------------|
| 1  |                 |            |                                              |                                                   |             |             |                           |                      |
| 2  |                 |            |                                              |                                                   |             |             |                           |                      |
| 3  | Spain,          | Journal    | To describe the implementation process       | <b>Family Intervention.</b> Based on F-BFT:       | General,    | Case Study  | N/A                       | Descriptive account  |
| 4  | Spanish,        | Article    | of a family psychoeducation programme        | psychoeducation, problem solving, skills          | Outpatient  |             |                           |                      |
| 5  | 2011 [71]       |            | in nine mental health services in Spain.     | training, relapse management.                     |             |             |                           |                      |
| 6  | Italy, Italian, | Journal    | To identify benefits and barriers in         | <b>Family Intervention.</b> Based on F-BFT:       | General,    | Cross-      | 10 psychiatrists, 5CPs, 6 | a) Descriptive       |
| 7  | 2011 [72]       | Article    | implementing a family psychoeducation        | psychoeducation, problem solving, skills          | Outpatient  | sectional,  | MHNs and 1 rehabilitation | reports of attrition |
| 8  |                 |            | programme, according                         | training, relapse management.                     |             | Mixed       | therapist                 | b) Questionnaire     |
| 9  |                 |            | to professionals perspectives                |                                                   |             | methods     |                           | (ratings and open-   |
| 10 |                 |            | and participation of families to the         |                                                   |             |             |                           | ended responses).    |
| 11 |                 |            | programme.                                   |                                                   |             |             |                           |                      |
| 12 | UK              | Book       | To provide an organisational case            | <b>Family Intervention.</b> 'Meriden Family Work  | General,    | Case Study  | N/A                       | Descriptive account  |
| 13 | (England),      | Chapter    | analysis of implementing a new family        | Programme' based on F-BFT:                        | Inpatient & |             |                           |                      |
| 14 | English,        |            | services programme in one UK Trust.          | psychoeducation, skills training, relapse         | Outpatient  |             |                           |                      |
| 15 | 2009 [84]       |            |                                              | management, problem solving.                      |             |             |                           |                      |
| 16 | UK              | Book       | To describe strategic approach to the        | <b>Family Intervention.</b> Based on the 'Meriden | General,    | Case Study  | N/A                       | Descriptive account  |
| 17 | (England),      | Chapter    | implementation of evidence-based             | Family Work Programme' used by Fadden and         | Inpatient & |             |                           |                      |
| 18 | English,        |            | approaches to family interventions in the    | colleagues: psychoeducation, skills training,     | Outpatient  |             |                           |                      |
| 19 | 2002 [74]       |            | UK West Midlands area.                       | relapse management, problem solving.              |             |             |                           |                      |
| 20 | UK              | Journal    | To ascertain the extent to which therapists  | <b>Family Intervention.</b> Based on Fadden's     | General,    | Cross-      | 35 CPNs, 20 MHNs, 9       | a) Questionnaire     |
| 21 | (England),      | Article    | trained in BFT have used the skills in their | 'Meriden Family Work Programme':                  | Inpatient & | sectional,  | Psychiatrists, 8 OTs, 7   | (Rating and open-    |
| 22 | English,        |            | day-to-day work, to examine what             | psychoeducation, skills training, relapse         | Outpatient  | Mixed       | SWs, 7 Rehabilitation     | ended responses)     |
| 23 | 1997 [73]       |            | difficulties they had encountered and to     | management, problem solving.                      |             | methods     | Officers                  | b) Between group     |
| 24 |                 |            | define outcomes and factors related to       |                                                   |             |             |                           | comparison of        |
| 25 |                 |            | success.                                     |                                                   |             |             |                           | ratings              |
| 26 | UK              | Journal    | To compare and contrast different            | <b>Family Intervention.</b> 'Psychosocial         | General,    | Cross-      | 3 Service Managers, 7     | Semi-structured      |
| 27 | (Scotland),     | Article    | elements of PSI courses and how they         | Intervention', developed from F-BFT:              | Outpatient  | sectional,  | Lecturers, 16 Mental      | interviews           |
| 28 | English,        |            | may impede/facilitate implementation ,       | assessment of relatives, psychoeducation,         |             | Qualitative | Health Workers            |                      |
| 29 | 2004 [102]      |            | understand organisational                    | skills training, problem-solving, crisis          |             |             |                           |                      |
| 30 |                 |            | catalysts/barriers and chart the             | management, cognitive behavioural                 |             |             |                           |                      |
| 31 |                 |            | relationship between organisation,           | management strategies.                            |             |             |                           |                      |
| 32 |                 |            | educational and care arrangements on         |                                                   |             |             |                           |                      |
| 33 |                 |            | the use of PSI.                              |                                                   |             |             |                           |                      |
| 34 | Canada,         | Journal    | To compare family nursing interventions      | <b>Systemic Psychotherapy.</b> 'Family systems    | General,    | Cross-      | 7 MHNs                    | a) Content analysis  |
| 35 | English,        | Article    | of nurses before and after an educational    | nursing approach': Targeting interactions         | Inpatient   | sectional,  |                           | of logbooks          |
| 36 | 2006 [75]       |            | programme based on the Calgary Family        | between members of the family and between         |             | Qualitative |                           | b) Semi-structured   |
| 37 |                 |            | Assessment Model and Calgary Family          | the family and practitioner.                      |             |             |                           | interviews           |
| 38 |                 |            | Intervention Model and to explore            |                                                   |             |             |                           |                      |
| 39 |                 |            | perceptions of the programme.                |                                                   |             |             |                           |                      |
| 40 | Australia,      | Conference | To evaluate service implementation of the    | <b>Family Intervention.</b> Based on Fadden's     | General,    | Case Study  | N/A                       | Descriptive account  |
| 41 | English,        | Paper      | 'Building Family Skills Together             | 'Meriden Family Work Programme':                  | Outpatient  |             |                           |                      |
| 42 | 2008 [86]       |            | Programme'.                                  | psychoeducation, skills training, relapse         |             |             |                           |                      |
| 43 |                 |            |                                              | management, problem solving. 'Family              |             |             |                           |                      |
| 44 |                 |            |                                              | Sensitive Practice' and a Family Practice         |             |             |                           |                      |
| 45 |                 |            |                                              | Consultant embedded in each service.              |             |             |                           |                      |
| 46 | Germany,        | Journal    | To assess the feasibility of continuous      | <b>Systemic Psychotherapy.</b> A systemic         | General,    | Cross-      | Staff trained in the      | a)Questionnaire      |
| 47 |                 |            |                                              |                                                   |             |             |                           |                      |
| 48 |                 |            |                                              |                                                   |             |             |                           |                      |
| 49 |                 |            |                                              |                                                   |             |             |                           |                      |

|    |                 |         |                                                 |                                                    |              |             |                            |                     |
|----|-----------------|---------|-------------------------------------------------|----------------------------------------------------|--------------|-------------|----------------------------|---------------------|
| 1  |                 |         |                                                 |                                                    |              |             |                            |                     |
| 2  |                 |         |                                                 |                                                    |              |             |                            |                     |
| 3  | English,        | Article | implementation of SYMPA (Systems                | resource-oriented and solution-oriented            | Inpatient    | sectional   | SYMPA method: survey       | (rating and open-   |
| 4  | 2013 [76]       |         | therapy methods in acute psychiatry)            | psychotherapeutic treatment.                       |              |             | 51, interviews 56 (overlap | ended responses)    |
| 5  |                 |         | related methods.                                |                                                    |              |             | in participants)           | b) Semi-structured  |
| 6  | UK              | Journal | To identify problems associated with            | <b>Behavioural Therapy.</b> 'Behavioural           | General,     | Case Study  | N/A                        | interviews          |
| 7  | (England),      | Article | implementing a behavioural intervention.        | Modification': Operant conditioning to reinforce   | Outpatient   |             |                            | Descriptive account |
| 8  | English,        |         |                                                 | "good" behaviours and discourage unhelpful         |              |             |                            |                     |
| 9  | 1978 [90]       |         |                                                 | ones, with the assistance of family members,       |              |             |                            |                     |
| 10 |                 |         |                                                 | needs assessment, information and                  |              |             |                            |                     |
| 11 |                 |         |                                                 | individualised practical support and advice for    |              |             |                            |                     |
| 12 | UK (Wales),     | Journal | To present an account of implementing FI        | <b>Family Intervention.</b> Based on the 'S.T.E.P. | Specialised  | Case Study  | N/A                        | a) Descriptive      |
| 13 | English,        | Article | within a routine clinical service rather than   | Service' model: psychoeducation; needs             | (Family      | & Audit     |                            | account             |
| 14 | 1996 [96]       |         | as part of a specially funded research          | assessment for further FI: problem solving,        | Intervention | report,     |                            | b) Audit results    |
| 15 |                 |         | project.                                        | behavioural goal setting, medication               | Service),    | Mixed       |                            |                     |
| 16 |                 |         |                                                 | management, relapse management, skills             | Outpatient   | methods     |                            |                     |
| 17 | UK              | Journal | To establish what therapists and families       | <b>Family Intervention.</b> F-BFT based model:     | Generic,     | Cross-      | 2 MHNs, 1 OT, 1 CP, 1      | Semi-structured     |
| 18 | (England),      | Article | believe to be helpful (or otherwise) in the     | needs assessment, psychoeducation, individual      | Inpatient &  | sectional,  | Physiotherapist, 1 SW, 1   | interviews          |
| 19 | English,        |         | engagement of families in Behavioural           | problem-solving approach, skills training.         | Outpatient   | Qualitative | Nurse Manager; 7           |                     |
| 20 | 2006 [95]       |         | Family Therapy.                                 |                                                    |              |             | relatives: 3 Mothers, 2    |                     |
| 21 |                 |         |                                                 |                                                    |              |             | Fathers, 1 Step-father, 1  |                     |
| 22 | Australia,      | Journal | To identify staff members' difficulties in      | <b>Family Intervention.</b> 'Living with           | General      | Cross-      | Daughter                   | a) Questionnaire    |
| 23 | English,        | Article | applying the FI and to predict the              | Schizophrenia' programme: needs assessment,        | Outpatient   | sectional,  | 29 MHNs, 8 CPs, 2 OTs,     | (ratings and        |
| 24 | 1993 [77]       |         | systematic use of the intervention with         | interactive psychoeducation, relapse               |              | Quantitativ | 3 SWs, 2 psychiatric       | examination of      |
| 25 |                 |         | families.                                       | management, goal-setting, problem solving,         |              | e           | registrars and 1           | intervention        |
| 26 |                 |         |                                                 | cognitive-behavioural self-management.             |              |             | psychiatrist               | knowledge)          |
| 27 | UK              | Journal | To evaluate a cross-educational practice        | <b>Family Intervention.</b> 'Psychosocial          | General,     | Cross-      | 8 Thorn graduates, 4 Line  | b) Regression       |
| 28 | (England),      | Article | meeting in assisting 'Thorn Course'             | Intervention' Thorn model, developed from F-       | Not          | sectional,  | Managers, 2 Thorn          | Semi-structured     |
| 29 | English,        |         | graduates to implement PSI into clinical        | BFT: assessment of relatives,                      | Reported     | Qualitative | lecturer practitioners, 1  | interviews          |
| 30 | 2010 [87]       |         | practice.                                       | psychoeducation, skills training, problem-         |              |             | operational services       |                     |
| 31 |                 |         |                                                 | solving, crisis management, cognitive              |              |             | director                   |                     |
| 32 | International   | Journal | To investigate the implementation and           | <b>Family Intervention.</b> Based on F-BFT:        | General,     | Cross-      | 15 Psychiatrists, 14       | Questionnaire       |
| 33 | (Greece,        | Article | effectiveness of a standard                     | psychoeducation, problem solving, skills           | Inpatient &  | sectional,  | MHNs, 7 CPs, 7 SWs, 1      | (rating and open-   |
| 34 | Germany,        |         | psychoeducational family intervention in        | training, relapse management.                      | Outpatient   | Mixed       | OT, 4 other                | ended responses)    |
| 35 | Italy,          |         | six European countries, exploring               |                                                    |              | methods     |                            |                     |
| 36 | Portugal,       |         | feasibility, difficulties, benefits and impact. |                                                    |              |             |                            |                     |
| 37 | Spain, UK),     |         |                                                 |                                                    |              |             |                            |                     |
| 38 | English,        | Journal | To investigate feasibility of providing         | <b>Family Intervention.</b> Based on F-BFT:        | General,     | Cross-      | 15 Psychiatrists, 11       | Questionnaire       |
| 39 | 2005 [78]       | Article | psychoeducational interventions for             | psychoeducation, problem solving, skills           | Outpatient   | sectional,  | MHNs, 5 CPs, 4             | (rating and open-   |
| 40 | Italy, English, |         | persons with schizophrenia and their            | training, relapse management.                      |              | Mixed       | Rehabilitation Therapists, | ended responses)    |
| 41 | 2006 [79]       |         | families.                                       |                                                    |              | methods     | 3 SWs                      |                     |
| 42 | UK              | Journal | To describe the use of the theory-based         | <b>Family Intervention.</b> Psycho-education,      | General,     | Cross-      | 6 SWs, 5 MHNs, 4 Team      | Semi-structured     |
| 43 |                 |         |                                                 |                                                    |              |             |                            |                     |
| 44 |                 |         |                                                 |                                                    |              |             |                            |                     |
| 45 |                 |         |                                                 |                                                    |              |             |                            |                     |
| 46 |                 |         |                                                 |                                                    |              |             |                            |                     |
| 47 |                 |         |                                                 |                                                    |              |             |                            |                     |
| 48 |                 |         |                                                 |                                                    |              |             |                            |                     |
| 49 |                 |         |                                                 |                                                    |              |             |                            |                     |



|    |              |         |                                                |                                                       |             |             |                            |                   |
|----|--------------|---------|------------------------------------------------|-------------------------------------------------------|-------------|-------------|----------------------------|-------------------|
| 1  |              |         |                                                |                                                       |             |             |                            |                   |
| 2  |              |         |                                                |                                                       |             |             |                            |                   |
| 3  | (England),   | Article | implementation interview (TBII) to             | problem solving, crisis planning, and                 | Outpatient  | sectional,  | Managers, 3 CPs, 2         | interviews        |
| 4  | English,     |         | understand the difficulties in implementing    | individualised patient interventions.                 |             | Qualitative | Psychiatrists              |                   |
| 5  | 2007 [80]    |         | the family intervention recommendation         |                                                       |             |             |                            |                   |
| 6  |              |         | within NICE's Schizophrenia guideline in       |                                                       |             |             |                            |                   |
| 7  | UK           | Journal | To investigate trainee participant             | <b>Family Intervention.</b> Integration of F- BFT and | General,    | Cross-      | 5 trainees enrolled in the | Semi-structured   |
| 8  | (England),   | Article | understanding of the use of family             | family CBT models: needs assessment, use of           | Not         | sectional   | family intervention module | interviews        |
| 9  | English,     |         | interventions in their clinical area, identify | behavioural interventions related to stress           | Reported    |             |                            |                   |
| 10 | 2013 [88]    |         | themes related to implementation into          | management and problem solving, relapse               |             |             |                            |                   |
| 11 |              |         | practice following completion of the           | management.                                           |             |             |                            |                   |
| 12 | UK           | Journal | To highlight issues encountered in service     | <b>Family Intervention.</b> Integration of F- BFT and | General,    | Case Study  | N/A                        | a) Descriptive    |
| 13 | (England),   | Article | development and discuss development of         | family CBT models: needs assessment, use of           | Inpatient & | & Cross-    |                            | account           |
| 14 | English,     |         | the pilot project with a focus on why          | behavioural interventions related to stress           | Outpatient  | sectional,  |                            | b) Focus groups   |
| 15 | 2007 [81]    |         | people who are trained in FI do not utilise    | management and problem solving, relapse               |             | Qualitative |                            |                   |
| 16 |              |         | the skills.                                    | management.                                           |             |             |                            |                   |
| 17 | UK (Northern | Journal | To explore the roles and perspectives of       | <b>Family Intervention.</b> 'Psychosocial             | General,    | Cross-      | 8 MHNs                     | Focus groups      |
| 18 | Ireland),    | Article | mental health nurse practitioners towards      | Intervention', developed from F-BFT: needs            | Inpatient & | sectional,  |                            |                   |
| 19 | English,     |         | clients with enduring mental illness and       | assessment, psychoeducation, skills training,         | Outpatient  | Qualitative |                            |                   |
| 20 | 2008 [104]   |         | their carers following completion of PSI       | problem-solving, relapse management,                  |             |             |                            |                   |
| 21 |              |         | training.                                      | cognitive behavioural management strategies.          |             |             |                            |                   |
| 22 | UK           | Journal | To examine the views of service users,         | <b>Family Intervention.</b> 'Relapse Prevention       | General,    | Cross-      | 18 CPNs, 2 OTs, 1 SW;      | Semi-structured   |
| 23 | (England),   | Article | relatives and care-coordinators of the         | Programme': six 1h manualised sessions;               | Outpatient  | sectional,  | 21 individuals diagnosed   | interviews        |
| 24 | English,     |         | value and barriers of involving family         | psychoeducation, relapse management, skills           |             | Qualitative | with Bipolar Disorder; 10  |                   |
| 25 | 2011 [82]    |         | members in relapse prevention.                 | training, crisis intervention planning.               |             |             | relatives: 6 Spouses, 3    |                   |
| 26 |              |         |                                                |                                                       |             |             | Parents, 1 Sibling         |                   |
| 27 | Finland,     | Journal | To determine how the participation of          | <b>Open Dialogue.</b> Rapid early involvement within  | General,    | Cross-      | 8 Psychiatrists, 5 CPs, 9  | Semi-structured   |
| 28 | English,     | Article | relatives in treatment was experienced by      | 24 hours, as often as needed; meetings with           | Outpatient  | sectional,  | MHNs; 10 individuals       | family interviews |
| 29 | 2009 [100]   |         | the relatives themselves, by the patients      | any members of the                                    |             | Qualitative | diagnosed with             |                   |
| 30 |              |         | and by staff members and what the              | patients' social network; collaborative               |             |             | Schizophrenia; 14          |                   |
| 31 |              |         | consequences of such participation were.       | participation of the patient and social network in    |             |             | relatives: 4 Mothers, 1    |                   |
| 32 |              |         |                                                | every phase of decision making and treatment.         |             |             | Father, 3 Sisters, 1       |                   |
| 33 |              |         |                                                |                                                       |             |             | Brother, 3 Spouses, 2 ex-  |                   |
| 34 |              |         |                                                |                                                       |             |             | Spouses, 1 Cousin          |                   |
| 35 | Finland,     | Journal | To elucidate the experiences and               | <b>Open Dialogue.</b> Rapid early involvement;        | General,    | Cross-      | 22 individuals receiving   | Semi-structured   |
| 36 | English,     | Article | importance of co-operation [in treatment]      | social network meetings; collaborative decision       | Outpatient  | sectional,  | treatment: 9 Psychosis     | interviews        |
| 37 | 2004 [99]    |         | for the patients.                              | making and treatment.                                 |             | Qualitative | Spectrum Disorder; 6       |                   |
| 38 |              |         |                                                |                                                       |             |             | Depressive or Anxiety      |                   |
| 39 |              |         |                                                |                                                       |             |             | Disorder; 7 Other mental   |                   |
| 40 |              |         |                                                |                                                       |             |             | disorder                   |                   |
| 41 | Finland,     | Journal | To illustrate Open Dialogue treatment          | <b>Open Dialogue.</b> Rapid early involvement;        | General,    | Case Study  | N/A                        | a) Descriptive    |
| 42 | English,     | Article | principles and process, with illustration      | social network meetings; collaborative decision       | Inpatient & |             |                            | account           |
| 43 | 2006 [93]    |         | from case studies, 5 years on from             | making and treatment.                                 | Outpatient  |             |                            | b) Case series    |
| 44 |              |         | introduction.                                  |                                                       |             |             |                            |                   |
| 45 |              |         |                                                |                                                       |             |             |                            |                   |
| 46 | Finland,     | Journal | To illustrate Open Dialogue process            | <b>Open Dialogue.</b> Rapid early involvement;        | General,    | Case Study  | N/A                        | a) Descriptive    |
| 47 | English,     | Article | treatment principles and process, with         | social network meetings; collaborative decision       | Inpatient & |             |                            | account           |
| 48 | 2001 [91]    |         | illustration from a case study.                | making and treatment.                                 | Outpatient  |             |                            | b) Case study     |
| 49 |              |         |                                                |                                                       |             |             |                            |                   |
| 50 | Finland,     | Journal | To illustrate Open Dialogue process            | <b>Open Dialogue.</b> Rapid early involvement;        | General,    | Case Study  | N/A                        | a) Descriptive    |
| 51 | English,     | Article | treatment principles and process , using       | social network meetings; collaborative decision       | Inpatient & |             |                            | account           |
| 52 | 2006 [94]    |         | examples of poor and good outcome case         | making and treatment.                                 | Outpatient  |             |                            | b) Case series    |

|    |            |         |                                              |                                                      |             |             |                             |                        |
|----|------------|---------|----------------------------------------------|------------------------------------------------------|-------------|-------------|-----------------------------|------------------------|
| 1  |            |         | studies.                                     |                                                      |             |             |                             |                        |
| 2  |            |         |                                              |                                                      |             |             |                             |                        |
| 3  |            |         |                                              |                                                      |             |             |                             |                        |
| 4  | Finland,   | Journal | To clarify the co-evolving process           | <b>Open Dialogue.</b> Rapid early involvement;       | General,    | Case Study  | N/A                         | a) Descriptive         |
| 5  | English,   | Article | between the family and hospital and          | social network meetings; collaborative decision      | Inpatient & |             |                             | account                |
| 6  | 1994 [97]  |         | report some results using the Open           | making and treatment.                                | Outpatient  |             |                             | b) Case study          |
| 7  | UK         | Journal | To evaluate the Family Support Service in    | <b>Family Intervention.</b> 'Psychosocial Family     | Specialised | Cross-      | 13 family interviews (23    | Group interview        |
| 8  | (England), | Article | terms of satisfaction, clinical outcome,     | Interventions for psychosis' following 'FIRST        | (Family     | Sectional,  | individuals); Psychotic     |                        |
| 9  | English,   |         | investigating aspects families found         | course' training: individual and family CBT with     | Support     | Qualitative | symptoms                    |                        |
| 10 | 2003 [92]  |         | helpful/unhelpful and other factors          | systemic perspective: needs assessment,              | Service),   |             |                             |                        |
| 11 | United     | Journal | possibly linked with satisfaction/outcome.   | education, skills training.                          | Outpatient  |             |                             |                        |
| 12 | States,    | Article | To examine the relationship between          | <b>Family Intervention.</b> 'Family Psychoeducation' | Generic,    | Cross-      | 26 individuals diagnosed    | Semi-structured        |
| 13 | English,   |         | independent observers' and therapists'       | adapted from F-BFT: psychoeducation,                 | Inpatient   | Sectional,  | with Bipolar Disorder; 33   | interviews             |
| 14 | 2000 [103] |         | ratings of difficulty in implementing family | communication training, problem-solving,             |             | Qualitative | relatives: 12 Mothers, 13   |                        |
| 15 |            |         | treatment for patients with bipolar disorder | relapse management and crisis intervention           |             |             | Fathers, 5 Spouses, 1       |                        |
| 16 |            |         | and pre-treatment measures of relatives'     | planning.                                            |             |             | Aunt, 1 Cousin, 1           |                        |
| 17 |            |         | emotional attitudes (EE), affective          |                                                      |             |             | Grandmother                 |                        |
| 18 | UK         | Journal | To obtain feedback from couples and          | <b>Systemic Psychotherapy.</b> Milan systemic and    | Specialised | Cross-      | 25 couples and families     | a) Observation         |
| 19 | (England), | Article | families on various aspects of the           | narrative based approaches.                          | (Systemic   | Sectional,  | receiving systemic therapy  | b) Clinical interviews |
| 20 | English,   |         | systemic therapy service and suggestions     |                                                      | Therapy     | Mixed       | for psychotic, personality, | c) Questionnaire       |
| 21 | 2005 [105] |         | for service improvement.                     |                                                      | Service),   | methods     | anxiety and depressive      | (rating responses)     |
| 22 |            |         |                                              |                                                      | Outpatient  |             | disorders                   |                        |

Abbreviations: *BFT*, Behavioural Family Therapy; *F-BFT*, Falloon's model of Behavioural Family Therapy; *CBT*, Cognitive Behavioural Therapy; *FI*, Family Intervention; *CP*, Clinical Psychologist; *CPN*, Community Psychiatric Nurse; *MHN*, Mental Health Nurse; *OT*, Occupational Therapist; *SW*, Social Worker



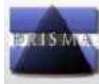

# PRISMA 2009 Checklist

1  
2  
3  
4  
5  
6  
7  
8  
9  
10  
11  
12  
13  
14  
15  
16  
17  
18  
19  
20  
21  
22  
23  
24  
25  
26  
27  
28  
29  
30  
31  
32  
33  
34  
35  
36  
37  
38  
39  
40  
41  
42  
43  
44  
45  
46  
47  
48  
49

| Section/topic             | #  | Checklist item                                                                                                                                                                                                                                                                                              | Reported on page #                                                  |
|---------------------------|----|-------------------------------------------------------------------------------------------------------------------------------------------------------------------------------------------------------------------------------------------------------------------------------------------------------------|---------------------------------------------------------------------|
| <b>TITLE</b>              |    |                                                                                                                                                                                                                                                                                                             |                                                                     |
| Title                     | 1  | Identify the report as a systematic review, meta-analysis, or both.                                                                                                                                                                                                                                         | 1                                                                   |
| <b>ABSTRACT</b>           |    |                                                                                                                                                                                                                                                                                                             |                                                                     |
| Structured summary        | 2  | Provide a structured summary including, as applicable: background; objectives; data sources; study eligibility criteria, participants, and interventions; study appraisal and synthesis methods; results; limitations; conclusions and implications of key findings; systematic review registration number. | 2-3                                                                 |
| <b>INTRODUCTION</b>       |    |                                                                                                                                                                                                                                                                                                             |                                                                     |
| Rationale                 | 3  | Describe the rationale for the review in the context of what is already known.                                                                                                                                                                                                                              | 4-5                                                                 |
| Objectives                | 4  | Provide an explicit statement of questions being addressed with reference to participants, interventions, comparisons, outcomes, and study design (PICOS).                                                                                                                                                  | 5                                                                   |
| <b>METHODS</b>            |    |                                                                                                                                                                                                                                                                                                             |                                                                     |
| Protocol and registration | 5  | Indicate if a review protocol exists, if and where it can be accessed (e.g., Web address), and, if available, provide registration information including registration number.                                                                                                                               | Protocol was uploaded as a supplementary file                       |
| Eligibility criteria      | 6  | Specify study characteristics (e.g., PICOS, length of follow-up) and report characteristics (e.g., years considered, language, publication status) used as criteria for eligibility, giving rationale.                                                                                                      | 6                                                                   |
| Information sources       | 7  | Describe all information sources (e.g., databases with dates of coverage, contact with study authors to identify additional studies) in the search and date last searched.                                                                                                                                  | 5-6                                                                 |
| Search                    | 8  | Present full electronic search strategy for at least one database, including any limits used, such that it could be repeated.                                                                                                                                                                               | 5-6. Database search strategy was uploaded as a supplementary file. |
| Study selection           | 9  | State the process for selecting studies (i.e., screening, eligibility, included in systematic review, and, if applicable, included in the meta-analysis).                                                                                                                                                   | 5-7. Figure 1 (PRISMA flow Diagram)                                 |
| Data collection process   | 10 | Describe method of data extraction from reports (e.g., piloted forms, independently, in duplicate) and any processes for obtaining and confirming data from investigators.                                                                                                                                  | 7-8                                                                 |

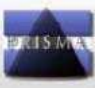

# PRISMA 2009 Checklist

1  
2  
3  
4  
5  
6  
7  
8  
9  
10  
11  
12  
13  
14  
15  
16  
17  
18  
19  
20  
21  
22  
23  
24  
25  
26  
27  
28  
29  
30  
31  
32  
33  
34  
35  
36  
37  
38  
39  
40  
41  
42  
43  
44  
45  
46  
47  
48  
49

|                                    |    |                                                                                                                                                                                                                        |                                              |
|------------------------------------|----|------------------------------------------------------------------------------------------------------------------------------------------------------------------------------------------------------------------------|----------------------------------------------|
| Data items                         | 11 | List and define all variables for which data were sought (e.g., PICOS, funding sources) and any assumptions and simplifications made.                                                                                  | 7-8                                          |
| Risk of bias in individual studies | 12 | Describe methods used for assessing risk of bias of individual studies (including specification of whether this was done at the study or outcome level), and how this information is to be used in any data synthesis. | N/A (See strengths and limitations, page 16) |
| Summary measures                   | 13 | State the principal summary measures (e.g., risk ratio, difference in means).                                                                                                                                          | 7 (Methods of analysis paragraph)            |
| Synthesis of results               | 14 | Describe the methods of handling data and combining results of studies, if done, including measures of consistency (e.g., $I^2$ ) for each meta-analysis.                                                              | 7 (Methods of analysis paragraph)            |

Page 1 of 2

| Section/topic               | #  | Checklist item                                                                                                                                                  | Reported on page #                           |
|-----------------------------|----|-----------------------------------------------------------------------------------------------------------------------------------------------------------------|----------------------------------------------|
| Risk of bias across studies | 15 | Specify any assessment of risk of bias that may affect the cumulative evidence (e.g., publication bias, selective reporting within studies).                    | N/A (See strengths and limitations, page 16) |
| Additional analyses         | 16 | Describe methods of additional analyses (e.g., sensitivity or subgroup analyses, meta-regression), if done, indicating which were pre-specified.                | N/A (See strengths and limitations, page 16) |
| <b>RESULTS</b>              |    |                                                                                                                                                                 |                                              |
| Study selection             | 17 | Give numbers of studies screened, assessed for eligibility, and included in the review, with reasons for exclusions at each stage, ideally with a flow diagram. | Page 8 and Figure 1                          |
| Study characteristics       | 18 | For each study, present characteristics for which data were extracted (e.g., study size, PICOS, follow-up period) and provide the citations.                    | Page 8-9 and Supplementary Table 1           |
| Risk of bias within studies | 19 | Present data on risk of bias of each study and, if available, any outcome level assessment (see item 12).                                                       | N/A (See strengths and limitations, page 16) |

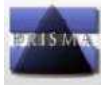

# PRISMA 2009 Checklist

1  
2  
3  
4  
5  
6  
7  
8  
9  
10  
11  
12  
13  
14  
15  
16  
17  
18  
19  
20  
21  
22  
23  
24  
25  
26  
27  
28  
29  
30  
31  
32  
33  
34  
35  
36  
37  
38  
39  
40  
41  
42  
43  
44  
45  
46  
47  
48  
49

|                               |    |                                                                                                                                                                                                          |                                                                    |
|-------------------------------|----|----------------------------------------------------------------------------------------------------------------------------------------------------------------------------------------------------------|--------------------------------------------------------------------|
| Results of individual studies | 20 | For all outcomes considered (benefits or harms), present, for each study: (a) simple summary data for each intervention group (b) effect estimates and confidence intervals, ideally with a forest plot. | N/A (Data analysed using a theoretical thematic analysis approach) |
| Synthesis of results          | 21 | Present results of each meta-analysis done, including confidence intervals and measures of consistency.                                                                                                  | N/A (Data analysed using a theoretical thematic analysis approach) |
| Risk of bias across studies   | 22 | Present results of any assessment of risk of bias across studies (see Item 15).                                                                                                                          | N/A (See strengths and limitations, page 16)                       |
| Additional analysis           | 23 | Give results of additional analyses, if done (e.g., sensitivity or subgroup analyses, meta-regression [see Item 16]).                                                                                    | N/A (See strengths and limitations, page 16)                       |
| <b>DISCUSSION</b>             |    |                                                                                                                                                                                                          |                                                                    |
| Summary of evidence           | 24 | Summarize the main findings including the strength of evidence for each main outcome; consider their relevance to key groups (e.g., healthcare providers, users, and policy makers).                     | 14-15, 16-17                                                       |
| Limitations                   | 25 | Discuss limitations at study and outcome level (e.g., risk of bias), and at review-level (e.g., incomplete retrieval of identified research, reporting bias).                                            | 15-16                                                              |
| Conclusions                   | 26 | Provide a general interpretation of the results in the context of other evidence, and implications for future research.                                                                                  | 16-18                                                              |
| <b>FUNDING</b>                |    |                                                                                                                                                                                                          |                                                                    |
| Funding                       | 27 | Describe sources of funding for the systematic review and other support (e.g., supply of data); role of funders for the systematic review.                                                               | 18                                                                 |

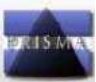

# PRISMA 2009 Checklist

- 1
- 2
- 3
- 4
- 5
- 6
- 7
- 8
- 9
- 10
- 11
- 12
- 13
- 14
- 15
- 16
- 17
- 18
- 19
- 20
- 21
- 22
- 23
- 24
- 25
- 26
- 27
- 28
- 29
- 30
- 31
- 32
- 33
- 34
- 35
- 36
- 37
- 38
- 39
- 40
- 41
- 42
- 43
- 44
- 45
- 46
- 47
- 48
- 49

For more information, visit: [www.prisma-statement.org](http://www.prisma-statement.org).

Page 2 of 2

For peer review only

# BMJ Open

## Implementing family involvement in the treatment of patients with psychosis: a systematic review of facilitating and hindering factors.

|                                 |                                                                                                                                                                                                                                                                                                                                                                                   |
|---------------------------------|-----------------------------------------------------------------------------------------------------------------------------------------------------------------------------------------------------------------------------------------------------------------------------------------------------------------------------------------------------------------------------------|
| Journal:                        | <i>BMJ Open</i>                                                                                                                                                                                                                                                                                                                                                                   |
| Manuscript ID:                  | bmjopen-2014-006108.R1                                                                                                                                                                                                                                                                                                                                                            |
| Article Type:                   | Research                                                                                                                                                                                                                                                                                                                                                                          |
| Date Submitted by the Author:   | 20-Aug-2014                                                                                                                                                                                                                                                                                                                                                                       |
| Complete List of Authors:       | Eassom, Erica; Queen Mary University of London, Unit for Social and Community Psychiatry<br>Giacco, Domenico; Queen Mary University of London, Unit for Social and Community Psychiatry<br>Dirik, Aysegul; Queen Mary University of London, Unit for Social and Community Psychiatry<br>Priebe, Stefan; Queen Mary University of London, Unit for Social and Community Psychiatry |
| <b>Primary Subject Heading</b>: | Mental health                                                                                                                                                                                                                                                                                                                                                                     |
| Secondary Subject Heading:      | Mental health, Communication, Evidence based practice                                                                                                                                                                                                                                                                                                                             |
| Keywords:                       | Schizophrenia & psychotic disorders < PSYCHIATRY, Health policy < HEALTH SERVICES ADMINISTRATION & MANAGEMENT, Organisational development < HEALTH SERVICES ADMINISTRATION & MANAGEMENT, Quality in health care < HEALTH SERVICES ADMINISTRATION & MANAGEMENT                                                                                                                     |
|                                 |                                                                                                                                                                                                                                                                                                                                                                                   |

SCHOLARONE™  
Manuscripts

## TITLE PAGE

1  
2  
3  
4  
5  
6  
7  
8  
9  
10  
11  
12  
13  
14  
15  
16  
17  
18  
19  
20  
21  
22  
23  
24  
25  
26  
27  
28  
29  
30  
31  
32  
33  
34  
35  
36  
37  
38  
39  
40  
41  
42  
43  
44  
45  
46  
47  
48  
49  
50  
51  
52  
53  
54  
55  
56  
57  
58  
59  
60

‘Implementing family involvement in the treatment of patients with psychosis: a systematic  
review of facilitating and hindering factors’

Erica Eassom<sup>a</sup>, Domenico Giacco<sup>a§</sup>, Aysegul Dirik<sup>a</sup> and Stefan Priebe<sup>a</sup>

§Correspondence to: D. Giacco [d.giacco@qmul.ac.uk](mailto:d.giacco@qmul.ac.uk)

<sup>a</sup>Unit for Social and Community Psychiatry (World Health Organization Collaborating  
Centre for Mental Health Services Development), Queen Mary University of London,  
London, UK.

Tel: +44 (0)20 7540 6755

Fax: +44 (0)20 7540 2976

**ABSTRACT****Objective:**

To synthesise the evidence on implementing family involvement in the treatment of patients with psychosis with a focus on barriers, problems and facilitating factors.

**Design:**

Systematic review of studies evaluating the involvement of families in tripartite communication between health professionals, 'families' (or other unpaid carers) and adult patients, in a single-family context. A theoretical thematic analysis approach and thematic synthesis were used.

**Data sources:**

A systematic electronic search was carried out in seven databases, using database specific search strategies and controlled vocabulary. A secondary hand search of grey literature was performed as well as using forwards and backwards snowballing techniques.

**Results:**

A total of 43 studies were included. The majority featured qualitative data (n=42), focused solely on staff perspectives (n=32) and were carried out in the United Kingdom (n=23). Facilitating the training and ongoing supervision needs of staff are necessary but not sufficient conditions for a consistent involvement of families. Organisational cultures and paradigms can work to limit family involvement, and effective implementation appears to operate via a whole team co-ordinated effort at every level of the organisation, supported by strong leadership. Reservations about family involvement regarding power relations, fear of negative outcomes and the need for an exclusive patient-professional relationship may be explored and addressed through mutually trusting relationships.

**Conclusions:**



1  
2  
3 Implementing family involvement carries additional challenges beyond those generally  
4 associated with translating research to practice. Implementation may require a cultural and  
5 organisational shift towards working with families. Family work can only be implemented if  
6 this is considered a shared goal of all members of a clinical team and/or mental health  
7 service, including the leaders of the organisation. This may imply a change in the ethos and  
8 practices of clinical teams, as well as the establishment of working routines that facilitate  
9 family involvement approaches.  
10  
11  
12  
13  
14  
15  
16  
17  
18  
19

### 20 **Strengths and Limitations**

21 Our study:

- 22 • Can inform policies and guidelines on family involvement so that they impact on  
23 routine practice.
- 24 • Is novel in covering a wide range of family involvement practices, highlighting  
25 common barriers, problems and facilitating factors.
- 26 • Synthesises rich qualitative data from professionals, patients and families.
- 27 • Could not include subgroup and quality analyses, due to the high correspondence  
28 between type of family involvement practice and methodology.
- 29 • May be conceptually limited as extant research has focused on perspectives of staff  
30 involved in family work and few studies are available on families' views.  
31  
32  
33  
34  
35  
36  
37  
38  
39  
40  
41  
42  
43  
44  
45  
46  
47  
48

### 49 **Key words:**

50 Carers; Psychosis; Severe mental illness (SMI); Family Intervention (FI); Implementation

51  
52  
53  
54  
55 Word count: 4,939 (excluding title page, abstract, references, figures and tables)  
56  
57  
58  
59  
60

## BACKGROUND

1  
2  
3  
4 The process of deinstitutionalisation of mental health care in the western world has led to families and others  
5  
6 in the community shouldering the psychosocial burden of care and informally adopting the role previously  
7  
8 provided by professionals in health care services [1-3]. The adoption of protected terms such as ‘carer’ in the  
9  
10 United Kingdom (UK) and ‘caregiver’ in the United States (US) is a response to the substantial, yet ‘non-  
11  
12 professional’ role that individuals in a close relationship have in supporting a person receiving mental health  
13  
14 treatment. The term may include parents, partners, siblings, children, friends or other people significant to  
15  
16 the individual: essentially, anyone who provides substantial support without being paid. The term carer can  
17  
18 be problematic, being considered by some to have connotations of dependency and of minimising the  
19  
20 significance of the relationship [4]. Also, many ‘carers’ do not self-identify as such, and consider their  
21  
22 caring role as being within the traditional responsibilities expected of them. To avoid confusion when  
23  
24 referring to family-directed initiatives, the single term ‘families’ will be adopted throughout this review, and  
25  
26 broadly applies to a person’s social network, not excluding their non-blood relatives.  
27  
28  
29  
30  
31  
32

33 ‘Family involvement’ in mental health services can take different forms, depending on the level of need and  
34  
35 availability of services. Generally, it can be conceived on a spectrum from more basic functions to  
36  
37 specialised interventions, the minimal level including the provision of general information on the mental  
38  
39 health service and assessments. On a more complex and specialised level, services can offer families  
40  
41 psychoeducation, consultation, Family Interventions (FIs) and therapies [5]. There are both strong economic  
42  
43 and moral imperatives to establish meaningful involvement and true collaborative working between families  
44  
45 and health professionals. These are recognised by international government policies and psychiatric  
46  
47 guidelines stipulating that families should be supported and actively involved in psychiatric treatment [6-  
48  
49 11]. Families can encourage engagement with treatment plans, recognise and respond to early warning signs  
50  
51 of relapse [12] and assist in accessing services during period of crisis [13-15]. Family involvement can lead  
52  
53 to better outcomes from psychological therapies [16] and pharmacological treatments [17], fewer inpatient  
54  
55 admissions, shorter inpatient stays, and better quality of life reports by patients [18-21].  
56  
57  
58  
59  
60

1  
2 However, despite the vast evidence base for Family Intervention [22-28] and Family Psychoeducation [29],  
3  
4 evidence suggests that family involvement is often not implemented in routine mental health care. There is  
5  
6 an abundance of both quantitative and qualitative studies into experiences of inpatient care reporting that  
7  
8 families feel marginalised and distanced from the care planning process. Common themes across  
9  
10 international studies indicate that families feel isolated, uninformed, lack a recognised role and are not  
11  
12 listened to or taken seriously [1 , 30-43]. Families also commonly report feeling that confidentiality is used  
13  
14 by professionals as a way to not share information [39 , 44]. Family Intervention as a treatment approach is  
15  
16 startlingly under-implemented, with extremely low numbers of families actually receiving it in clinical  
17  
18 services [11 , 45-47]. It is the case that for many, contact between professionals and families remains limited  
19  
20 to telephone calls during crisis periods [48].  
21  
22  
23  
24  
25

26  
27 Why is family involvement in treatment so under-applied? There has been much debate about the reasons  
28  
29 (e.g. [22 , 49-51]) and some suggest they are linked to general problems of implementing new evidence-  
30  
31 based practices in clinical services [29]. Other proposed barriers are more specific to family interventions,  
32  
33 such as the danger of increasing burden related to caregiving, role strain, lack of experience and/or interest  
34  
35 [52] and the complexities of navigating confidentiality [53]. Such discussions are largely speculative and  
36  
37 reviews of evidence tend to focus on the provision of specific interventions, such as Family Psychoeducation  
38  
39 [29] or Family Intervention [54]. This systematic review aims to assess how the involvement of families is  
40  
41 implemented in the treatment of patients with psychosis, taking a broad view of involvement as described  
42  
43 above in order to capture the barriers, problems and facilitating factors that operate in practice. In doing so,  
44  
45 this may help to better define and implement families' involvement in psychiatric treatment in the future.  
46  
47  
48  
49  
50

## 51 **METHODS**

52  
53 The full protocol for this systematic review is reported in the Supplementary file 1.  
54  
55  
56  
57

### 58 **Identifying relevant studies**

1  
2  
3  
4  
5  
6  
7  
8  
9  
10  
11  
12  
13  
14  
15  
16  
17  
18  
19  
20  
21  
22  
23  
24  
25  
26  
27  
28  
29  
30  
31  
32  
33  
34  
35  
36  
37  
38  
39  
40  
41  
42  
43  
44  
45  
46  
47  
48  
49  
50  
51  
52  
53  
54  
55  
56  
57  
58  
59  
60

Computerised databases were searched for eligible studies: MEDLINE, EMBASE, PsycINFO, AMED (via Ovid), BNI and CINAHL (via HILO), Social Sciences Citations Index (via Web of Knowledge) and CDSR, DARE and CENTRAL (via the Cochrane Library). Word groups representing patient diagnosis, intervention and involvement terms and outcome descriptors were combined in several ways. Strategies were adapted for each database, using controlled vocabulary (MeSH, Emtree, Thesaurus of Psychological Index Terms) and free text (see Supplementary File 2). The search was last repeated on 01/06/2014.

Publication bias was minimised by including conference papers and book chapters, searching grey literature for dissertations and reports (ETHOS, SIGL) and corresponding with authors to identify further works. Both backward snowballing (from the reference lists of included studies and identified reviews) and forward snowballing (finding citations to the papers) was conducted.

### **Inclusion procedure**

A study was eligible for inclusion if: 1) it was an original collection of data; 2) situated in primary or secondary mental health services; 3) the patient population included people being treated for psychotic disorders<sup>1</sup>; 4) the intervention involved tripartite communication between health professionals (any), families (unpaid carers) and adult patients, excluding those focused exclusively on professional–family communication, family-family communication or multiple-family groups; and 5) results described barriers, problems and/or facilitating factors in involving families in treatment. No study type was excluded, however only Latin-script languages were able to be translated.

‘Barriers’ were defined as factors that prevented an approach from taking place or limited the scope of it, ‘problems’ referred to issues that emerged when delivering an approach and ‘facilitating factors’ were considered to be any factors that aided implementation or delivery. ‘Family involvement’ was defined inclusively as any process allowing health professionals, families and patients to actively collaborate in treatment, such as in making joint treatment decisions. Studies not reporting clear information on how

---

<sup>1</sup> Attempts were made where possible to focus on patients with psychosis, however many studies used opportunity sampling of mixed ‘severe mental illness’ groups, which were included in order to be as inclusive as possible.

1 families were involved in treatment were excluded. Studies into general experiences, opinions, satisfaction  
2 or needs were also excluded, unless they related to a clearly described specific involvement in treatment.  
3  
4  
5

6  
7 Two reviewers (EE and DG) screened all of the titles and collected relevant abstracts. These were screened  
8 and then excluded if they did not fit the selection criteria. Studies that seemed to include relevant data or  
9 information were retrieved and their full text versions analysed and examined for study eligibility. All final  
10 full text choices were confirmed and agreed by both reviewers.  
11  
12  
13  
14

### 15 16 17 18 **Method of Analysis**

19 Data extraction and synthesis was guided by the *Economic and Social Research Council (ESRC)*'s Guidance  
20 on the Conduct of Narrative Synthesis in Systematic Reviews [55].  
21  
22  
23  
24

25 The included studies used both qualitative and quantitative methods, yet clearly had conceptual overlaps  
26 despite reporting results in different formats. Any available quantitative data were usually descriptive,  
27 reported in addition to qualitative findings and were largely used to explore existing themes or concepts. It  
28 was therefore considered appropriate to transform quantitative findings into qualitative form to  
29 systematically identify the main concepts across the studies using thematic analysis [55 , 56]. The use of this  
30 method is increasingly being advocated with studies involving data that are quantitative or from mixed  
31 methods [56-58] to address questions relating to intervention need, appropriateness and acceptability in  
32 systematic reviews [59].  
33  
34  
35  
36  
37  
38  
39  
40  
41  
42  
43  
44

### 45 46 47 **Data extraction and synthesis**

48 Theoretical Thematic Analysis [60] using inductive themes to identify the barriers, problems and facilitating  
49 factors of family involvement was used as a framework to explore further themes.  
50  
51  
52  
53  
54  
55  
56  
57  
58  
59  
60

1 Two non-clinician researchers (EE and AD) independently extracted author interpretations and participant  
2 data from the included studies using a piloted data extraction sheet. They then separately allocated the  
3 findings to relevant sections of the framework (e.g. 'Barriers according to staff perspectives') and coded the  
4 data within each section. Identified categories (e.g. 'Unsupportive attitudes of managers') were aggregated  
5 into subthemes (e.g. 'Attitudes towards family work') and finally became grouped under overarching themes  
6 (e.g. 'Context: Addressing Organisational Culture'). These emerging themes were discussed throughout  
7 analysis along with a clinician-researcher (DG), and discrepancies were resolved through iterative  
8 discussions. Robustness of the synthesis was investigated and themes were checked for completeness. Two  
9 clinician-researchers (DG and SP) acted as third party assessors of the final data synthesis.  
10  
11  
12  
13  
14  
15  
16  
17  
18  
19  
20  
21  
22

## 23 RESULTS

### 24 Included studies

25 Database searching produced 15615 titles to screen. After removing duplicates and irrelevant papers, a full  
26 text assessment of 119 documents was conducted. Twenty eight publications met our inclusion criteria and  
27 second stage searching including grey literature searching, personal correspondence and snowballing  
28 techniques led to the further identification and inclusion of 15 articles. This brought the final number of  
29 studies to 43. The PRISMA flowchart in Figure 1 depicts the identification and exclusion of articles.  
30  
31  
32  
33  
34  
35  
36  
37

38 (Insert Figure 1 here).  
39  
40  
41  
42

### 43 Overview of papers

44 Forty-two papers were published between 1991-2013 and one in 1978. Just over half of the studies were  
45 based on UK findings, with the rest from Finland, the USA, Italy, Australia, Canada, Germany, India,  
46 Ireland, New Zealand, Spain, Greece and Portugal. Mainly, papers reported on experiences of implementing  
47 Family Intervention approaches (n=33). Typically these followed a similar structure and were broadly  
48 modelled on the Behavioural Family Therapy approach [61] (see Supplementary File 3 for full study  
49 characteristics). This included variations such as 'Psychosocial Intervention' and 'Family Psychoeducation'  
50  
51  
52  
53  
54  
55  
56  
57  
58  
59  
60

1 that fit the model of a Family Intervention. The remainder explored Open Dialogue approaches (n=6),  
2 Systemic Psychotherapy (n=3) and one purely Behavioural Therapy programme. The vast majority were  
3 cross-sectional studies and 13 were naturalistic evaluations, descriptions or case studies of a service. In all,  
4 37 papers explored staff perspectives, eight papers featured patient perspectives and six featured 'family'  
5 perspectives. In total, the review included data of 588 professionals, 321 patients and 276 'family members'  
6 or 'families'.  
7  
8  
9  
10  
11  
12  
13  
14  
15  
16

### 17 **In depth review: Synthesis across studies**

18  
19  
20  
21 Figure 2 summarises the final cross-study synthesis: the identified barriers/problems (in red) and facilitating  
22 factors (in green) and the themes in which they seemed to be operating. The themes closely relate to  
23 temporal sequencing in the process of delivering an intervention: the *context*, *engagement*, and then *delivery*.  
24 The figure provides a visual representation of the matches and gaps between barriers and facilitating factors  
25 related to involving families. This is for the most part conceptual, as barriers and their direct facilitating  
26 factors may not have been discussed in the same study. The themes and sub-themes are explored in greater  
27 detail in the synthesis below, which includes details of problems associated with delivering approaches that  
28 involve families as well as barriers and facilitating factors of this work.  
29  
30  
31  
32  
33  
34  
35  
36  
37  
38  
39  
40

41 (Insert Figure 2 here)  
42  
43  
44

### 45 ***Context: Addressing the Organisational Culture***

46  
47  
48 This theme reflects the majority of the findings, mostly from staff perspectives. Their experience of  
49 implementing family work could be characterised as working in relative isolation in a system where  
50 colleagues and managers did not value and prioritise family involvement or were openly hostile to it. With  
51 multi-disciplinary co-operation and working systems not in place, practical burdens associated with family  
52  
53  
54  
55  
56  
57  
58  
59  
60



1  
2  
3  
4  
5  
6  
7  
8  
9  
10  
11  
12  
13  
14  
15  
16  
17  
18  
19  
20  
21  
22  
23  
24  
25  
26  
27  
28  
29  
30  
31  
32  
33  
34  
35  
36  
37  
38  
39  
40  
41  
42  
43  
44  
45  
46  
47  
48  
49  
50  
51  
52  
53  
54  
55  
56  
57  
58  
59  
60

work were sometimes insurmountable. Mirroring this, factors that enabled family involvement to take place were related to top-down management support, prioritisation and changing the culture of family work.

### *Organisational Attitudes and Paradigms*

This subtheme covered general attitudes, such as family involvement not being valued at organisational and team level but also highlighted possible entrenched reasons for this. For example, individualistic, biological paradigms made family work seem secondary or optional [62-64] and staff found it difficult to adopt a collaborative stance, relinquishing the role of didactic problem solver [63]. In some cases, it appeared that historical negative attitudes towards families had not shifted [62 , 64]. Anti-family work attitudes described amongst colleagues ranged from resistance towards the approaches [63 , 65-68] to well-intentioned but complicating beliefs regarding clinicians' duty towards the patient [64 , 69 , 70]. Facilitating factors related not only to specific strategies but to an overall shared culture and prioritisation of family work [64 , 71 , 72], shifting attitudes towards viewing the family as equal partners [71 , 73] and thinking more systemically about problems [71 , 74].

### *Practical Needs Associated with Family Work*

Overwhelmingly, staff reported on the practical burdens of family work: that it requires time, resources and funding and is difficult to integrate with other clinical casework [62 , 64-70 , 73 , 75-87], particularly in areas with high demands and clinical crises [73 , 82 , 83]. Specific needs reported for family work included flexible hours [64 , 65 , 67 , 70 , 80 , 82-84 , 87-90] and the accommodation of family requirements such as childcare facilities [80] or home visits [82 , 89 , 91]. A lack of systems and structure for carrying out and recording family work was also reported as a barrier to implementation and problem during delivery [63 , 87 , 92]. This included a lack of co-ordination between inpatient and outpatient care [62]. These issues were compounded by reports of services and managers not making time allowances for family work, e.g. not providing time in lieu for out of hours work [64 , 65 , 77 , 83 , 84], or obstructing time use, e.g. by refusing the release of staff for training [63].

### *Management Culture*

1  
2  
3  
4  
5  
6  
7  
8  
9  
10  
11  
12  
13  
14  
15  
16  
17  
18  
19  
20  
21  
22  
23  
24  
25  
26  
27  
28  
29  
30  
31  
32  
33  
34  
35  
36  
37  
38  
39  
40  
41  
42  
43  
44  
45  
46  
47  
48  
49  
50  
51  
52  
53  
54  
55  
56  
57  
58  
59  
60

Commonly, staff reported on the unsupportive attitudes of managers and colleagues as limiting the implementation of family involvement [63 , 64 , 66 , 77-79 , 87 , 92 , 93]. This ranged from a “*management culture of benign neglect rather than of active opposition*” [93] to overt challenges such as not respecting ring-fenced time for family work [87]. The strongest facilitator seemed to be that of strong leadership through senior management support and developing strategic solutions. This “sanctioned” family work, giving it core priority status within the service [64], and could facilitate specific powerful initiatives such as writing family work into business plans, policies and job descriptions of all staff [63 , 79]. Further endorsement came from providing flexible hours, creating new staff roles and financial provision [63 , 73 , 79 , 94]. The value emerged of having regular multi-disciplinary meetings to address team-specific needs [72 , 78 , 79 , 88] and developing strategies that prioritised family work and made it a part of regular clinical practice [63 , 72 , 73 , 79 , 88 , 94]. This included having routine assessment of all families, asking clinicians about families when reviewing caseloads and providing regular feedback of family data to teams and managers [63 , 94].

### *Training Needs*

Staff also reported on lacking access to adequate supervision and training [62 , 63 , 65 , 66 , 83 , 86 , 87 , 92] as barriers to implementation. This may link with reports of staff lacking skills or confidence to do the work [62 , 64 , 85 , 86 , 92]. Some problems during delivery (such as managing family dynamics [64 , 65 , 70 , 74 , 78 , 88 , 95]) could also be related to staff skills and experience [71 , 78 , 81]. As expected, having a structured regime of supervision, encouraging attendance and ongoing support was described as helping staff to deliver work with families [63 , 72 , 78 , 79 , 88]. Staff also reported on the value of belief in the approach and having an identity in their role [71 , 72 , 79 , 81 , 86].

### *Team Attitudes, Commitment and Multi-disciplinary Co-operation*

Difficulties arose when only a minority of team members had been trained in an intervention [82]. Staff reported that collaboration was often lacking [63 , 65 , 69 , 73 , 77 , 80] and that involving families requires whole team commitment [76 , 82]. ‘Ownership’ was sometimes an issue, with various staff groups

1  
2  
3  
4  
5  
6  
7  
8  
9  
10  
11  
12  
13  
14  
15  
16  
17  
18  
19  
20  
21  
22  
23  
24  
25  
26  
27  
28  
29  
30  
31  
32  
33  
34  
35  
36  
37  
38  
39  
40  
41  
42  
43  
44  
45  
46  
47  
48  
49  
50  
51  
52  
53  
54  
55  
56  
57  
58  
59  
60

perceiving family work as within the domain of other roles, not theirs [69 , 80]. Role and team-specific issues also emerged, such as psychiatrists, inpatient staff and home treatment teams being less involved [63 , 66 , 73 , 81]. Collaboration in the form of multi-disciplinary co-working, peer-supervision and whole team approaches were all reported as aids to implementing family work [63 , 66 , 71-74 , 78 , 79 , 82 , 88].

Problems with finding ‘appropriate’ referrals were reported widely [65 , 67 , 68 , 77 , 78 , 80 , 82 , 83 , 93]. Whilst some patients do not have families, the pervasiveness of this response also called into question staff members’ pre-existing ideas about what constitutes an ‘appropriate’ family for intervention. Staff reported the resistance of other professionals to make referrals [67 , 88], family work services being “forgotten” and referrals being made as a “last resort”, by which time the families themselves may have grown resistant [93]. Acting as a facilitator was the promotion of family work, both as a cascading effect through colleagues and across services [64 , 79 , 87].

### ***Engagement: Addressing Concerns through Openness, Encouragement and Building Alliances***

The next theme related to the process of engagement, informed more broadly by both staff and family responses. A picture emerged of families sometimes being reluctant to engage, and of valid concerns. Yet the successful establishment of trusting relationships indicates these concerns may be surmountable in many cases.

#### ***Reservations about Involving Families***

Similar issues around the nature of involving families emerged as a barrier to families becoming involved and as problems during treatment. Some concerns seemed linked to fears around power and control: bi-directional privacy concerns (keeping the extent of the illness from the family and keeping family issues from services) [70] and patients’ fears of placing relatives in a position of power [70 , 95] or of exposing their vulnerability [75]. Responses in all three participant groups addressed the need for an exclusive patient-

1 professional relationship [69 , 70 , 76 , 95]. Existing individual and family problems (such as patients'  
2 symptoms being directed at family members [62]) also precluded family involvement. Both families and  
3 staff expressed fears of making the current situation worse, such as by burdening the family and worsening  
4 the patient's symptoms [70 , 80 , 84 , 86 , 91]. Professionals described building trust and rapport, through  
5 open discussions with the family, acknowledging concerns and providing reassurance [71 , 74 , 88 , 91].  
6  
7  
8  
9  
10

### 11 *Problems Engaging Families*

12  
13  
14 These were often unspecified as scepticism, lack of motivation or refusal from the families, occurring prior  
15 to engagement or during treatment [65 , 76 , 78 , 83 , 84 , 88 , 93 , 96]. As professional responses, these may  
16 reflect their attitudes towards families as unmotivated, but could also describe the failure of the team to  
17 mobilise the family in favour of treatment [96]. A factor described as a facilitator was having a critical  
18 period of engagement: intensive efforts at contact and involvement early on after contact with services [93 ,  
19 96-99] and presenting the approach enthusiastically [71 , 89] functioned to establish collaborative  
20 relationships between families and professionals as the modus operandi.  
21  
22  
23  
24  
25  
26  
27  
28  
29  
30  
31  
32  
33

### 34 *Delivery: Active Collaboration, Professional Skills and Respect for Families as Individuals*

35  
36  
37 The final theme related to factors that affected how staff members delivered family interventions and how  
38 families experienced them. As a whole, both family and staff responses highlight the importance of  
39 respectful, equal partnership, enhanced by professional skills and experience.  
40  
41  
42  
43  
44  
45

### 46 *Working Relationships between Families and Professionals*

47  
48 Collaboration between families and professionals on an equal footing appeared valued by both families and  
49 professionals. Lack of collaboration was cited as a problem during delivery, resulting in families feeling  
50 patronised or not understood [76]. Open Dialogue papers particularly emphasised the lack of success when  
51 actions were unilaterally decided, rather than emerging from a joint process [74 , 99]. Factors helping to  
52 overcome this included being able to relinquish control, i.e. tolerate uncertainty in order to allow a joint  
53  
54  
55  
56  
57  
58  
59  
60

1  
2  
3  
4  
5  
6  
7  
8  
9  
10  
11  
12  
13  
14  
15  
16  
17  
18  
19  
20  
21  
22  
23  
24  
25  
26  
27  
28  
29  
30  
31  
32  
33  
34  
35  
36  
37  
38  
39  
40  
41  
42  
43  
44  
45  
46  
47  
48  
49  
50  
51  
52  
53  
54  
55  
56  
57  
58  
59  
60

solution to emerge [78 , 96 , 98-100], approaching the family on an equal basis [71] and actively collaborating with families during meetings [66 , 71 , 89 , 92 , 96].

How families experienced an approach closely linked with their experience of the professional. Some families reported experiencing an approach as negative or critical, both through the model itself e.g. its characterisation of illness [101], or experiences of the professional, perhaps as criticising parenting [101 , 102]. Yet, the interpersonal qualities of the professional and the establishment of a therapeutic alliance strongly emerged as facilitating factors: professionals being informed, genuine, warm, non-blaming [71 , 89 , 101] and demonstrating an awareness and understanding of the problems of the whole family [71 , 79 , 89 , 90 , 99].

A lack of continuity was cited as a problem [99], whilst a facilitator was having the same team involved from the beginning and staying with the family throughout the treatment process [96 , 98 , 99].

#### *Individualisation within the approach*

Approaches were sometimes described as culturally insensitive [76 , 88]: rigid, manualised approaches did not meet the general needs of particular groups whilst individual needs, such as illiteracy, were sometimes not catered to [64 , 76 , 97 , 103]. Professionals and families valued having a clear structure whilst allowing for flexibility [71 , 76 , 88 , 99]. Professionals' skills were also important, by way of communicating information in an easy-to-understand format, avoiding jargon [71 , 88 , 89 , 99] and developing an individualised and contextualised approach [71 , 76 , 88 , 93 , 99].

#### *Working with Complex Needs*

Professionals highlighted the complexities of working both with families and with patients with psychosis. The difficulties of managing patient symptoms and working in a meaningful way with their beliefs [73 , 104] may be compounded by family dynamics [64 , 65 , 70 , 74 , 78 , 88 , 95 , 104] and potentially relatives' own emotional and affective problems [104]. Staff members' qualities, skills and experience in the area

1 were naturally described as facilitating factors [71 , 76 , 78 , 79 , 81 , 83 , 89 , 90 , 100]. Perhaps  
2 unsurprisingly, useful skills were described as working creatively to overcome barriers, hypothesising,  
3 reflecting and persevering [71 , 79 , 100].  
4  
5  
6  
7

## 8 **DISCUSSION**

### 9 **Main findings**

10 Our results suggest that having ‘top-down’ support and training some staff members to carry out family  
11 work is necessary but not sufficient. In order to effectively implement family involvement in care, all  
12 members of a clinical team should be trained and regularly supervised and a ‘whole team approach’ should  
13 be used. Developing a clear structure for the intervention may be beneficial for the delivery of family  
14 involvement, provided that flexibility to accommodate individual needs is ensured. Concerns emerged  
15 regarding privacy, power relations, fear of negative outcomes and the need for an exclusive patient-  
16 professional relationship. Exploring and acknowledging such concerns through open, yet non-judgemental  
17 communication could facilitate the establishment of a therapeutic alliance between staff, families and  
18 patients.  
19  
20  
21  
22  
23  
24  
25  
26  
27  
28  
29  
30  
31  
32  
33  
34  
35  
36

37 These findings may help to explain why family interventions – despite their overwhelming evidence base  
38 and their inclusion in practically all policies and guidelines – are so poorly implemented in routine practice.  
39 The requirements identified may be challenging given that family-oriented practice may need to be  
40 embraced by a whole organisation and included in work routines in order to be implemented.  
41  
42  
43  
44  
45  
46  
47

### 48 **Strengths and limitations**

49 To our knowledge, this is the first systematic review that specifically focused on barriers, problems and  
50 facilitating factors for the implementation of family involvement in the treatment of patients with psychosis.  
51 This is of high importance given the current climate of government policies and psychiatric guidelines  
52 stipulating that families should be supported and actively involved in psychiatric treatment [6-11], and the  
53  
54  
55  
56  
57  
58  
59  
60

1  
2  
3  
4  
5  
6  
7  
8  
9  
10  
11  
12  
13  
14  
15  
16  
17  
18  
19  
20  
21  
22  
23  
24  
25  
26  
27  
28  
29  
30  
31  
32  
33  
34  
35  
36  
37  
38  
39  
40  
41  
42  
43  
44  
45  
46  
47  
48  
49  
50  
51  
52  
53  
54  
55  
56  
57  
58  
59  
60

disappointments in achieving this in practice so far. The search strategy allowed for the capture of a large number of studies, different researchers independently extracted and reviewed the data and when necessary authors were contacted to clarify ambiguous information. The use of thematic analysis, described as having the “most potential for hypothesis generation” [108], allowed for understanding the larger picture, which is more than the sum of its findings. Whilst interpretative, this process has been carried out in accordance with RATS guidelines [61] and presented transparently. Though some themes were not highly recurrent -for example criticisms of manualisation emerged only in structured approaches such as Behavioural Family Therapy- in all, findings were complimentary, not contradictory. The fact that common themes emerged in spite of variations in approach, across 16 countries, speaks for the robustness of the findings as representing shared issues with family involvement.

However a number of limitations must be considered when interpreting the results of this study. Methodologically, conducting sub-group analysis, i.e. for different intervention models, was not considered viable due to the strong association between type of approach and methodology used e.g. Open Dialogue with case studies and Behavioural Family Therapy with the Family Intervention Schedule (FIS) questionnaire. Carrying out a sub-group analysis may have therefore had the risk of mischaracterising certain approaches due to variation in the richness of data. Whilst there are well-established methods for assessing the quality of intervention studies, this is not the case for studies of implementation processes, qualitative or mixed methods research [56] and the use of appraisal tools in qualitative research remains contentious [109, 110]. The decision not to use quality-based analysis was therefore also based on recognition of the important contribution and explanatory value that descriptive accounts offer. Despite efforts to find grey literature, the search strategy may still have been limited in its bias towards published research, yet the nature of this review topic means that service level audits and evaluations are likely to be of relevance. Conceptually, the dominance of staff and academic perspectives may have led to barriers within the organisation being explored most thoroughly, however does not lead to the conclusion that there are no inherent problems with involving families in clinical settings.



### **Comparison with available literature and implications for practice**

1  
2 Our findings reflect important key features for implementation of evidence based practices, already  
3 identified in previous research in implementation science, such as top-down input and leadership and the  
4 need for continuing consultation and training [105]. The presence of management and leadership decisions  
5 and strategies operating as barriers and facilitating factors throughout the organisational context –both  
6 directly and indirectly– aligns with findings that leadership at all levels (e.g. executive director, middle  
7 manager, clinical supervisor) is associated with innovation [106], implementation of evidence based practice  
8 (EBP) [107], and with improving the organisational context for EBP implementation [108]. The need for  
9 support from senior managers (and commissioners) and for a whole team approach is also reflected in the  
10 suggestions on how to implement family work in mental health services provided by professionals and  
11 carers with experience of participating in a Family Behavioural Therapy Programme, [109].  
12  
13  
14  
15  
16  
17  
18  
19  
20  
21  
22  
23  
24  
25  
26

27 The fundamental role of the organisational context is emphasised in the literature with both culture (the  
28 normative beliefs and shared expectations of the organisation) and organisational climate (the psychological  
29 impact of the work environment on the professional) strongly moderating the uptake of evidence based  
30 practices [110]. The practice to be implemented must match the mission, values, tasks and duties of the  
31 organisation and individuals within that organisation [111]. The absence of a strong organisational culture  
32 favouring family work may be influenced by traditional paradigms based on the predominance of biological  
33 models of mental illness, which tend to minimise the focus on the individual's social context [50]. Also, the  
34 characterisations of families as dysfunctional and sometimes even as 'the cause of psychiatric illness,'  
35 despite being widely rejected [112], may have contributed to a loss of trust in services and strained  
36 relationships between professionals and families [113]. This may explain the importance and the effort  
37 required in building alliances, which emerged in our findings. Clinicians may uphold the patient-  
38 professional alliance by addressing concerns regarding privacy and by being mindful that patients do not  
39 perceive a loss of power due to having family involvement in their care.  
40  
41  
42  
43  
44  
45  
46  
47  
48  
49  
50  
51  
52  
53  
54  
55  
56  
57

### **Future directions for research**

1  
2  
3  
4  
5  
6  
7  
8  
9  
10  
11  
12  
13  
14  
15  
16  
17  
18  
19  
20  
21  
22  
23  
24  
25  
26  
27  
28  
29  
30  
31  
32  
33  
34  
35  
36  
37  
38  
39  
40  
41  
42  
43  
44  
45  
46  
47  
48  
49  
50  
51  
52  
53  
54  
55  
56  
57  
58  
59  
60

So far the findings largely reflect what can go wrong rather than provide evidence of successful implementation. For example, sustainability has not been addressed in the review as this stage has hardly been reached. More research will be needed to see which organisational steps can actually change the culture in a service so that family involvement happens, not only in a research study or with particular patients, but with all families, every day, and over longer periods of time.

Future studies should attempt to better capture wider views, particularly in-depth understanding of patients' and families' views. This may also enable insight into the potentially varied experiences of minority groups. These views may be best obtained outside of group interviews, in which a power imbalance may be present. There would also be value in exploring the views of professionals who have not already demonstrated commitment to family work.

Despite a 'whole team approach' seeming to be the way forward for a widespread implementation of family work, there is a need to obtain insight into the organisational challenges that may be related to this and to develop clear practical guidelines for the reorganisation of clinical teams.

1  
2  
3 **Funding:** This paper presents independent research and was partially funded by the National Institute for  
4 Health (NIHR) Research Collaboration for Leadership in Applied Health Research and Care (CLAHRC)  
5 North Thames at Bart's Health NHS Trust. The views expressed are those of the author(s) and not  
6 necessarily those of the NHS, the NIHR or the Department of Health.  
7  
8  
9

10  
11  
12  
13 **Competing interests:** The authors declare they have no competing interests.  
14

15  
16 **Authors' contributions:** DG, EE and SP contributed to the conception and design of the study. EE designed  
17 and conducted the search, DG and EE selected the studies. AD and EE extracted data and carried out the  
18 thematic synthesis. EE wrote the manuscript, AD and DG reviewed and edited the manuscript and SP  
19 provided critical review of the manuscript. All authors contributed to and approved the final submitted  
20 version.  
21  
22  
23  
24  
25  
26

27  
28 **Acknowledgements:** None  
29

30  
31 **Data Sharing Statements:** No additional data available  
32  
33  
34  
35  
36  
37  
38

### 39 **Figures & Table Legends**

40  
41  
42 **Figure 1.** PRISMA flow diagram for paper selection  
43

44 **Figure 2.** Barriers, problems and facilitating factors related to family work. Summary of themes  
45

46 **Supplementary File 1.** Protocol for Systematic Review  
47

48 **Supplementary File 2.** Modified database search strategies  
49

50 **Supplementary File 3.** Characteristics of included studies (n=43)  
51  
52  
53  
54  
55  
56  
57  
58  
59  
60

## REFERENCES

1. Clarke C. Relating with professionals. *Journal of Psychiatric and Mental Health Nursing* 2006;**13**(5):522-26
2. Parker G, Clarke H. Making the ends meet: do carers and disabled people have a common agenda? *Policy & Politics* 2002;**30**(3):347-59
3. Thornicroft G, Tansella M. Growing recognition of the importance of service user involvement in mental health service planning and evaluation. *Epidemiologia E Psichiatria Sociale* 2005;**14**(01):1-3
4. Guberman N, Nicholas E, Nolan M, et al. Impacts on practitioners of using research-based carer assessment tools: experiences from the UK, Canada and Sweden, with insights from Australia. *Health & Social Care in the Community* 2003;**11**(4):345-55
5. Mottaghypour Y, Bickerton A. The Pyramid of Family Care: A framework for family involvement with adult mental health services. *Advances in Mental Health* 2005;**4**(3):210-17
6. Australian Government. Carer Recognition Act 2010. Australia: Australian Government, 2010.
7. Department of Health. Recognised, valued and supported: Next steps for the Carers Strategy. London: HMSO, 2010.
8. Substance Abuse and Mental Health Services Administration (SAMHSA). Family psychoeducation: How to use the evidence-based practices KITS. Rockville, MD: U.S. Department of Health and Human Services, 2009.
9. National Institute for Mental Health in England. NIMHE Guiding Statement on Recovery: Department of Health, 2005.
10. National Collaborating Centre for Mental Health. Psychosis and schizophrenia in adults: treatment and management NICE clinical guideline 178: National Institute for Health and Care Excellence, 2014.
11. Schizophrenia Commission (Rethink). The abandoned illness: a report from Schizophrenia Commission, 2012.
12. Herz MI, Lamberti JS, Mintz J, et al. A program for relapse prevention in schizophrenia: a controlled study. *Archives of General Psychiatry* 2000;**57**(3):277-83
13. Fridgen GJ, Aston J, Gschwandtner U, et al. Help-seeking and pathways to care in the early stages of psychosis. *Social Psychiatry and Psychiatric Epidemiology* 2013;**48**(7):1033-43
14. Bergner E, Leiner AS, Carter T, et al. The period of untreated psychosis before treatment initiation: A qualitative study of family members' perspectives. *Comprehensive Psychiatry* 2008;**49**(6):530-36 doi: 10.1016/j.comppsy.2008.02.010[published Online First: Epub Date].
15. Morgan C, Fearon P, Hutchinson G, et al. Duration of untreated psychosis and ethnicity in the AESOP first-onset psychosis study. *Psychological Medicine* 2006;**36**(2):239-48
16. Garety PA, Fowler DG, Freeman D, et al. Risk of harm after psychological intervention: Authors' reply. *The British Journal of Psychiatry* 2008;**193**(4):345-46
17. Glick ID, Stekoll AH, Hays S. The role of the family and improvement in treatment maintenance, adherence, and outcome for schizophrenia. *Journal of Clinical Psychopharmacology* 2011;**31**(1):82-85
18. Schofield N, Quinn J, Haddock G, et al. Schizophrenia and substance misuse problems: a comparison between patients with and without significant carer contact. *Social Psychiatry and Psychiatric Epidemiology* 2001;**36**(11):523-28 doi: 10.1007/s001270170001[published Online First: Epub Date].
19. Fleury M-J, Grenier G, Caron J, et al. Patients' report of help provided by relatives and services to meet their needs. *Community Mental Health Journal* 2008;**44**(4):271-81
20. Norman RM, Malla AK, Manchanda R, et al. Social support and three-year symptom and admission outcomes for first episode psychosis. *Schizophrenia Research* 2005;**80**(2):227-34
21. Tempier R, Balbuena L, Lepnurm M, et al. Perceived emotional support in remission: results from an 18-month follow-up of patients with early episode psychosis. *Social Psychiatry and Psychiatric Epidemiology* 2013;**48**(12):1897-904
22. Murray-Swank AB, Dixon L. Family psychoeducation as an evidence-based practice. *Cns Spectrums* 2004

23. Pfammatter M, Junghan UM, Brenner HD. Efficacy of psychological therapy in schizophrenia: Conclusions from meta-analyses. *Schizophrenia Bulletin* 2006;**32**:S64-S80 doi: 10.1093/schbul/sb1030[published Online First: Epub Date].
24. Pharoah F, Mari J, Rathbone J, et al. Family intervention for schizophrenia. *Cochrane database of systematic reviews (Online)* 2010;**12**:CD000088
25. Pitschel-Walz G, Leucht S, Bäuml J, et al. The effect of family interventions on relapse and rehospitalization in schizophrenia: a meta-analysis. *FOCUS: The Journal of Lifelong Learning in Psychiatry* 2004;**2**(1):78-94
26. Pilling S, Bebbington P, Kuipers E, et al. Psychological treatments in schizophrenia: I. Meta-analysis of family intervention and cognitive behaviour therapy. *Psychological Medicine* 2002;**32**(5):763-82
27. National Collaborating Centre for Mental Health. *Schizophrenia: core interventions in the treatment and management of schizophrenia in primary and secondary care (update)*: British Psychological Society, 2009.
28. Marshall M, Rathbone J. Early intervention for psychosis. *Cochrane Database of Systematic Reviews* 2011(6):CD004718-NaN
29. Lucksted A, McFarlane W, Downing D, et al. Recent developments in family psychoeducation as an evidence-based practice. *Journal of Marital and Family Therapy* 2012;**38**(1):101-21
30. Cleary M, Freeman A, Hunt GE, et al. What patients and carers want to know: an exploration of information and resource needs in adult mental health services. *Australian and New Zealand Journal of Psychiatry* 2005;**39**(6):507-13 doi: 10.1080/j.1440-1614.2005.01611.x[published Online First: Epub Date].
31. Jubb M, Shanley E. Family involvement: The key to opening locked wards and closed minds. *International Journal of Mental Health Nursing* 2002;**11**(1):47-53
32. O'Brien L, Cole R. Mental health nursing practice in acute psychiatric close-observation areas. *International Journal of Mental Health Nursing* 2004;**13**(2):89-99
33. Rose LE, Mallinson RK, Walton-Moss B. Barriers to family care in psychiatric settings. *Journal of Nursing Scholarship* 2004;**36**(1):39-47
34. Longo S, Scior K. In-patient psychiatric care for individuals with intellectual disabilities: the service users' and carers' perspectives. *Journal of Mental Health* 2004;**13**(2):211-21
35. Hodgson O, King R, Leggatt M. Carers of mentally ill people in Queensland: Their perceived relationships with professional mental health service providers: Report on a survey. *Advances in Mental Health* 2002;**1**(3):220-34
36. Lammers J, Happell B. Mental health reforms and their impact on consumer and carer participation: a perspective from Victoria, Australia. *Issues in Mental Health Nursing* 2004;**25**(3):261-76
37. Keeley B, Clarke M. *Carers speak out project: report on findings and recommendations*: Princess Royal Trust for Carers London, 2002.
38. Wilkinson C, McAndrew S. 'I'm not an outsider, I'm his mother!' A phenomenological enquiry into carer experiences of exclusion from acute psychiatric settings. *International Journal of Mental Health Nursing* 2008;**17**(6):392-401 doi: 10.1111/j.1447-0349.2008.00574.x[published Online First: Epub Date].
39. Askey R, Holmshaw J, Gamble C, et al. What do carers of people with psychosis need from mental health services? Exploring the views of carers, service users and professionals. *Journal of Family Therapy* 2009;**31**(3):310-31
40. Pinfold V, Corry P. *Who cares? The experiences of mental health carers accessing services and information*. Kingston-upon-Thames: Rethink 2003
41. Pinfold V, Farmer P, Rapaport J, et al. *Positive and inclusive. Effective Ways for Professionals to Involve Carers in Information Sharing*. Report to the National Co-ordinating Centre for NHS Service Delivery and Organisation R & D (NCCSDO) 2004
42. Repper J, Grant G, Nolan M, et al. *Carers' views on, and experiences of mental health services and carer assessments: the results of a consultation exercise*. Partnerships in Carer Assessment Project. School of Nursing and Midwifery, University of Sheffield 2005
43. Walsh J, Boyle J. Improving acute psychiatric hospital services according to inpatient experiences. A user-led piece of research as a means to empowerment. *Issues in Mental Health Nursing* 2009;**30**(1):31-38
44. Rethink. *Who Cares? The Experience of Mental Health Carers Accessing Services and Information*. London: Rethink Publications, 2003.
45. Glynn SM. Family interventions in schizophrenia: Promise and pitfalls over 30 years. *Current Psychiatry Reports* 2012;**14**(3):237-43
46. Dixon L, McFarlane WR, Lefley H, et al. Evidence-based practices for services to families of people with psychiatric disabilities. *Psychiatric Services* 2001;**52**(7):903-10

- 1 47. Berry K, Haddock G. The implementation of the NICE guidelines for schizophrenia: Barriers to the implementation  
2 of psychological interventions and recommendations for the future. *Psychology and Psychotherapy-Theory  
3 Research and Practice* 2008;**81**:419-36 doi: 10.1348/147608308x329540[published Online First: Epub Date]].
- 4 48. Kim H, Salyers MP. Attitudes and perceived barriers to working with families of persons with severe mental  
5 illness: mental health professionals' perspectives. *Community Mental Health Journal* 2008;**44**(5):337-46
- 6 49. Cohen A, Glynn S, Murray-Swank A, et al. The Family Forum: directions for the implementation of family  
7 psychoeducation for severe mental illness. *Psychiatric Services* 2008;**59**(1):40-48
- 8 50. Glynn SM, Cohen AN, Dixon LB, et al. The potential impact of the recovery movement on family interventions for  
9 schizophrenia: opportunities and obstacles. *Schizophrenia Bulletin* 2006;**32**(3):451-63
- 10 51. Prytys M, Garety P, Jolley S, et al. Implementing the NICE guideline for schizophrenia recommendations for  
11 psychological therapies: a qualitative analysis of the attitudes of CMHT staff. *Clinical Psychology &  
12 Psychotherapy* 2011;**18**(1):48-59
- 13 52. Simpson E, House A. User and carer involvement in mental health services: from rhetoric to science. *The British  
14 Journal of Psychiatry* 2003;**183**(2):89-91
- 15 53. Slade M, Pinfold V, Rapaport J, et al. Best practice when service users do not consent to sharing information with  
16 carers National multimethod study. *The British Journal of Psychiatry* 2007;**190**(2):148-55
- 17 54. Mairs H, Bradshaw T. Implementing family intervention following training: what can the matter be? *Journal of  
18 Psychiatric and Mental Health Nursing* 2005;**12**(4):488-94
- 19 55. Popay J, Roberts H, Sowden A, et al. Guidance on the conduct of narrative synthesis in systematic reviews. A  
20 product from the ESRC Methods Programme. Version 2006;**1**
- 21 56. Mays N, Pope C, Popay J. Systematically reviewing qualitative and quantitative evidence to inform management  
22 and policy-making in the health field. *Journal of Health Services Research & Policy* 2005;**10**(suppl 1):6-20
- 23 57. Barnett-Page E, Thomas J. Methods for the synthesis of qualitative research: a critical review. *Bmc Medical  
24 Research Methodology* 2009;**9**(1):59
- 25 58. Dixon-Woods M, Agarwal S, Jones D, et al. Synthesising qualitative and quantitative evidence: a review of  
26 possible methods. *Journal of Health Services Research & Policy* 2005;**10**(1):45-53B
- 27 59. Thomas J, Harden A. Methods for the thematic synthesis of qualitative research in systematic reviews. *Bmc  
28 Medical Research Methodology* 2008;**8**(1):45
- 29 60. Braun V, Clarke V. Using thematic analysis in psychology. *Qualitative research in psychology* 2006;**3**(2):77-101
- 30 61. Clark J. How to peer review a qualitative manuscript. *Peer review in health sciences* 2003;**2**:219-35
- 31 62. Brent BK, Giuliano AJ. Psychotic-spectrum illness and family-based treatments: A case-based illustration of the  
32 underuse of family interventions. *Harvard Review of Psychiatry* 2007;**15**(4):161-68
- 33 63. Fadden G. Overcoming Barriers to Staff Offering Family Interventions in the NHS. *A Casebook of Family  
34 Interventions for Psychosis* 2009:309
- 35 64. Fadden G, Birchwood M, Lefley H, et al. British models for expanding family psychoeducation in routine practice.  
36 *Family Interventions in Mental Illness: International Perspectives*. Praeger, Westport, CT 2002:25-41
- 37 65. Brennan G, Gamble C. Schizophrenia family work and clinical practice. *Mental Health Nursing-London-  
38 Community Psychiatric Nurses Association* 1997;**17**:12-16
- 39 66. Brooker C, Butterworth C. Working with families caring for a relative with schizophrenia: the evolving role of the  
40 community psychiatric nurse. *International Journal of Nursing Studies* 1991;**28**(2):189-200
- 41 67. Del Vecchio V, Luciano M, Malangone C, et al. Implementing family psychoeducational intervention for bipolar I  
42 disorder in 17 Italian Mental Health Centres. *Giornale Italiano di Psicopatologia / Italian Journal of  
43 Psychopathology* 2011;**17**(3):277-82
- 44 68. Butler MP, Begley M, Parahoo K, et al. Getting psychosocial interventions into mental health nursing practice: a  
45 survey of skill use and perceived benefits to service users. *Journal of Advanced Nursing* 2014;**70**(4):866-77  
46 doi: 10.1111/jan.12248[published Online First: Epub Date]].
- 47 69. Goudreau J, Duhamel F, Ricard N. The impact of a family systems nursing educational program on the practice of  
48 psychiatric nurses - A pilot study. *Journal of Family Nursing* 2006;**12**(3):292-306 doi:  
49 10.1177/1074840706291694[published Online First: Epub Date]].
- 50 70. Peters S, Pontin E, Lobban F, et al. Involving relatives in relapse prevention for bipolar disorder: a multi-  
51 perspective qualitative study of value and barriers. *Bmc Psychiatry* 2011.  
52 <http://onlinelibrary.wiley.com/o/cochrane/clcentral/articles/341/CN-00851341/frame.html>.
- 53 71. James C, Cushway D, Fadden G. What works in engagement of families in behavioural family therapy? A positive  
54 model from the therapist perspective. *Journal of Mental Health* 2006;**15**(3):355-69



- 1  
2  
3  
4  
5  
6  
7  
8  
9  
10  
11  
12  
13  
14  
15  
16  
17  
18  
19  
20  
21  
22  
23  
24  
25  
26  
27  
28  
29  
30  
31  
32  
33  
34  
35  
36  
37  
38  
39  
40  
41  
42  
43  
44  
45  
46  
47  
48  
49  
50  
51  
52  
53  
54  
55  
56  
57  
58  
59  
60
72. Kelly M, Galvin K. Does a cross-educational practice meeting assist Thorn graduates to implement psychosocial interventions into clinical practice? *Journal of Mental Health Training, Education and Practice*, The 2010;**5**(4):18-26
73. Haun MW, Kordy H, Ochs M, et al. Family systems psychiatry in an acute in-patient setting: the implementation and sustainability 5 years after its introduction. *Journal of Family Therapy* 2013;**35**(2):159-75 doi: 10.1111/j.1467-6427.2012.00586.x[published Online First: Epub Date]].
74. Seikkula J. When the boundary opens: family and hospital in co-evolution. *Journal of Family Therapy* 1994;**16**(4):401-14
75. Allen J, Burbach F, Reibstein J. 'A different world' individuals' experience of an integrated family intervention for psychosis and its contribution to recovery. *Psychology & Psychotherapy: Theory, Research & Practice* 2013;**86**(2):212-28
76. Allen RES, Read J. Integrated mental health care: practitioners' perspectives. *Australian and New Zealand Journal of Psychiatry* 1997;**31**(4):496-503 doi: 10.3109/00048679709065071[published Online First: Epub Date]].
77. Baguley I, Butterworth A, Fahy K, et al. Bringing into clinical practice skills shown to be effective in research settings: A follow-up of 'Thorn Training' in psychosocial family interventions for psychosis. *Psychosis: Psychological approaches and their effectiveness*. London, England: Gaskell/Royal College of Psychiatrists; England, 2000:96-119.
78. Bailey R, Burbach FR, Lea SJ. The ability of staff trained in family interventions to implement the approach in routine clinical practice. *Journal of Mental Health* 2003;**12**(2):131-42
79. Fadden G, Heelis R, Bisnauth R. Training mental health care professionals in behavioural family therapy: an audit of trainers' experiences in the West Midlands. *Journal of Mental Health Training, Education and Practice*, The 2010;**5**(2):27-35
80. Cohen A, Glynn S, Young A, et al. Implementing family services at mental health clinics. *Journal of General Internal Medicine* 2010;**25**:S305-S06
81. De La Higuera Romero J, Ramirez Ruiz RM. Implementation of family psycho-educational programs in clinical practice: Analysis of an experience. *Apuntes de Psicología* 2011;**29**(1):71-85
82. Fadden G. Implementation of family interventions in routine clinical practice following staff training programs: a major cause for concern. *Journal of Mental Health* 1997;**6**(6):599-613
83. Kavanagh DJ, Clark D, Manicavasagar V, et al. Application of cognitive-behavioral family intervention for schizophrenia in multidisciplinary teams - what can the matter be. *Australian Psychologist* 1993;**28**(3):181-88 doi: 10.1080/00050069308258899[published Online First: Epub Date]].
84. Magliano L, Fiorillo A, Fadden G, et al. Effectiveness of a psychoeducational intervention for families of patients with schizophrenia: preliminary results of a study funded by the European Commission. *World Psychiatry* 2005;**4**(1):45
85. Magliano L, Fiorillo A, Malangone C, et al. Implementing psychoeducational interventions in Italy for patients with schizophrenia and their families. *Psychiatric Services* 2006;**57**(2):266-70
86. Michie S, Pilling S, Garety P, et al. Difficulties implementing a mental health guideline: an exploratory investigation using psychological theory. *Implementation Science* 2007;**2** doi: 10.1186/1748-5908-2-8[published Online First: Epub Date]].
87. Murphy N. Development of family interventions: a 9-month pilot study. *British Journal of Nursing* 2007;**16**(15):948
88. Balaji M, Chatterjee S, Koschorke M, et al. The development of a lay health worker delivered collaborative community based intervention for people with schizophrenia in India. *Bmc Health Services Research* 2012;**12**:42
89. Campbell A. How was it for you? Families' experiences of receiving Behavioural Family Therapy. *Journal of Psychiatric and Mental Health Nursing* 2004;**11**(3):261-67
90. Stanbridge RI, Burbach FR, Lucas AS, et al. A study of families' satisfaction with a family interventions in psychosis service in Somerset. *Journal of Family Therapy* 2003;**25**(2):181-204 doi: 10.1111/1467-6427.00243[published Online First: Epub Date]].
91. Hudson BL. Behavioural social work with schizophrenic patients in the community. *British Journal of Social Work* 1978;**8**(2):159-70
92. Murphy N, Withnell N. Assessing the impact of delivering family interventions training modules: findings of a small-scale study. *Mental Health Nursing* 2013;**33**(5)
93. Hughes I, Hailwood R, Abbati-Yeoman J, et al. Developing a family intervention service for serious mental illness: clinical observations and experiences. *Journal of Mental Health* 1996;**5**(2):145-60



- 1 94. Building family skills together: An implementation strategy for evidence-based family interventions in public  
2 mental health services; 2008. Sydney: The MHS Conference Inc.
- 3 95. Piippo J, Aaltonen J. Mental health and creating safety: the participation of relatives in psychiatric treatment and  
4 its significance. *Journal of Clinical Nursing* 2009;**18**(14):2003-12
- 5 96. Seikkula J, Alakare B, Aaltonen J. Open dialogue in psychosis II: A comparison of good and poor outcome cases.  
6 *Journal of Constructivist Psychology* 2001;**14**(4):267-84 doi: 10.1080/107205301750433405[published Online  
7 First: Epub Date] |.
- 8 97. Forrest S, Masters H, Milne V. Evaluating the impact of training in psychosocial interventions: a stakeholder  
9 approach to evaluation—part II. *Journal of Psychiatric and Mental Health Nursing* 2004;**11**(2):202-12
- 10 98. Seikkula J, Aaltonen J, Alakare B, et al. Five-year experience of first-episode nonaffective psychosis in open-  
11 dialogue approach: Treatment principles, follow-up outcomes, and two case studies. *Psychotherapy*  
12 *Research* 2006;**16**(2):214-28 doi: 10.1080/10503300500268490[published Online First: Epub Date] |.
- 13 99. Seikkula J, Alakare B, Aaltonen J. Open dialogue in psychosis I: An introduction and case illustration. *Journal of*  
14 *Constructivist Psychology* 2001;**14**(4):247-65 doi: 10.1080/107205301750433397[published Online First:  
15 Epub Date] |.
- 16 100. O'Neill M, Moore K, Ryan A. Exploring the role and perspectives of mental health nurse practitioners following  
17 psychosocial interventions training. *Journal of Psychiatric and Mental Health Nursing* 2008;**15**(7):582-87
- 18 101. Budd RJ, Hughes IC. What do relatives of people with schizophrenia find helpful about family intervention?  
19 *Schizophrenia Bulletin* 1997;**23**(2):341
- 20 102. Viljoen D, Boyd J. Service user views: Promoting a systemic therapy service in adult mental health. *Clinical*  
21 *Psychology Forum* 2005(152):13-16
- 22 103. Piippo J, Aaltonen J. Mental health: integrated network and family-oriented model for co-operation between  
23 mental health patients, adult mental health services and social services. *Journal of Clinical Nursing*  
24 2004;**13**(7):876-85
- 25 104. Tompson MC, Rea MM, Goldstein MJ, et al. Difficulty in implementing a family intervention for bipolar disorder:  
26 the predictive role of patient and family attributes. *Family Process* 2000; (1).  
27 <http://onlinelibrary.wiley.com/o/cochrane/clcentral/articles/892/CN-00557892/frame.html>.
- 28 105. Fixsen DL, Blase KA, Naoom SF, et al. Core implementation components. *Research on Social Work Practice*  
29 2009;**19**(5):531-40
- 30 106. Edmondson AC, Bohmer RM, Pisano GP. Disrupted routines: Team learning and new technology  
31 implementation in hospitals. *Administrative Science Quarterly* 2001;**46**(4):685-716
- 32 107. Edmondson AC. Learning from failure in health care: frequent opportunities, pervasive barriers. *Quality and*  
33 *Safety in Health Care* 2004;**13**(suppl 2):ii3-ii9
- 34 108. Aarons G. Transformational and transactional leadership: Association with attitudes toward evidence-based  
35 practice. *Psychiatric Services* 2006;**57**(8):1162-69
- 36 109. Fadden G, Heelis R. The Meriden Family Programme: lessons learned over 10 years. *Journal of Mental Health*  
37 2011;**20**(1):79-88
- 38 110. Glisson C, James LR. The cross-level effects of culture and climate in human service teams. *Journal of*  
39 *Organizational Behavior* 2002;**23**(6):767-94
- 40 111. Klein KJ, Sorra JS. The challenge of innovation implementation. *Academy of management review*  
41 1996;**21**(4):1055-80
- 42 112. Wynne LC. The rationale for consultation with the families of schizophrenic patients. *Acta Psychiatrica*  
43 *Scandinavica* 1994;**90**(s384):125-32
- 44 113. Winefield HR. Barriers to an alliance between family and professional caregivers in chronic schizophrenia.  
45 *Journal of Mental Health* 1996;**5**(3):223-32
- 46
- 47
- 48
- 49
- 50
- 51
- 52
- 53
- 54
- 55
- 56
- 57
- 58
- 59
- 60

## TITLE PAGE

‘Implementing family involvement in the treatment of patients with psychosis: a systematic review of facilitating and hindering factors’

Erica Eassom<sup>a</sup>, Domenico Giacco<sup>a§</sup>, Aysegul Dirik<sup>a</sup> and Stefan Priebe<sup>a</sup>

§Correspondence to: D. Giacco d.giacco@qmul.ac.uk

<sup>a</sup>Unit for Social and Community Psychiatry (World Health Organization Collaborating Centre for Mental Health Services Development), Queen Mary University of London, London, UK.

Tel: +44 (0)20 7540 6755

Fax: +44 (0)20 7540 2976

## ABSTRACT

### Objective:

To synthesise the evidence on implementing family involvement in the treatment of patients with psychosis with a focus on barriers, problems and **facilitating factors**.

### Design:

Systematic review of studies evaluating the involvement of families in tripartite communication between health professionals, 'families' (or other unpaid carers) and adult patients, in a single-family context. A theoretical thematic analysis approach and thematic synthesis were used.

### Data sources:

A systematic electronic search was carried out in seven databases, using database specific search strategies and controlled vocabulary. A secondary hand search of grey literature was performed as well as using forwards and backwards snowballing techniques.

### Results:

A total of 43 studies were included. The majority featured qualitative data (**n=42**), focused solely on staff **perspectives (n=32)** and were carried out in the United Kingdom (**n=23**).

**Facilitating the** training and ongoing supervision needs **of staff** are necessary but not sufficient conditions for a consistent involvement of families. Organisational cultures and paradigms can work to limit family involvement, and effective implementation appears to operate via a whole team co-ordinated effort **at every level of the organisation**, supported by strong leadership. Reservations about family involvement regarding power relations, fear of negative outcomes and the need for an exclusive patient-professional relationship may be explored and addressed through mutually trusting relationships.

### Conclusions:

1  
2  
3 Implementing family involvement carries additional challenges beyond those generally  
4 associated with translating research to practice. Implementation may require a cultural and  
5 organisational shift towards working with families. Family work can only be implemented if  
6 this is considered a shared goal of all members of a clinical team and/or mental health  
7 service, including the leaders of the organisation. This may imply a change in the **ethos and**  
8 **practices of clinical teams**, as well as the establishment of working routines that facilitate  
9 family involvement approaches.  
10  
11  
12  
13  
14  
15  
16  
17  
18  
19

### 20 **Strengths and Limitations**

21 Our study:

- 22 • Can inform policies and guidelines on family involvement so that they impact on  
23 routine practice.
- 24 • Is novel in covering a wide range of family involvement practices, highlighting  
25 common barriers, problems and **facilitating factors**.
- 26 • Synthesises rich qualitative data from professionals, patients and families.
- 27 • Could not include subgroup and quality analyses, due to the high correspondence  
28 between type of family involvement practice and methodology.
- 29 • May be conceptually limited as extant research has focused on perspectives of staff  
30 involved in family work and few studies are available on families' views.  
31  
32  
33  
34  
35  
36  
37  
38  
39  
40  
41  
42  
43  
44  
45  
46  
47  
48

### 49 **Key words:**

50 Carers; Psychosis; **Severe** mental illness (SMI); Family Intervention (FI); Implementation

51  
52  
53  
54 Word count: **4,939** (excluding title page, abstract, references, figures and tables)  
55  
56  
57  
58  
59  
60

## BACKGROUND

1  
2  
3  
4  
5 The process of deinstitutionalisation of mental health care in the western world has led to families and others  
6  
7 in the community shouldering the psychosocial burden of care and informally adopting the role previously  
8  
9 provided by professionals in health care services [1-3]. The adoption of protected terms such as ‘carer’ in the  
10  
11 United Kingdom (UK) and ‘caregiver’ in the United States (US) is a response to the substantial, yet ‘non-  
12  
13 professional’ role that individuals in a close relationship have in supporting a person receiving mental health  
14  
15 treatment. The term may include parents, partners, siblings, children, friends or other people significant to  
16  
17 the individual: essentially, anyone who provides substantial support without being paid. The term carer can  
18  
19 be problematic, being considered by some to have connotations of dependency and of minimising the  
20  
21 significance of the relationship [4]. Also, many ‘carers’ do not self-identify as such, and consider their  
22  
23 caring role as being within the traditional responsibilities expected of them. To avoid confusion when  
24  
25 referring to family-directed initiatives, the single term ‘families’ will be adopted throughout this review, and  
26  
27 broadly applies to a person’s social network, not excluding their non-blood relatives.  
28  
29  
30  
31  
32

33  
34 ‘Family involvement’ in mental health services can take different forms, depending on the level of need and  
35  
36 availability of services. Generally, it can be conceived on a spectrum from more basic functions to  
37  
38 specialised interventions, the minimal level including the provision of general information on the mental  
39  
40 health service and assessments. On a more complex and specialised level, services can offer families  
41  
42 psychoeducation, consultation, Family Interventions (FIs) and therapies [5]. There are both strong economic  
43  
44 and moral imperatives to establish meaningful involvement and true collaborative working between families  
45  
46 and health professionals. These are recognised by international government policies and psychiatric  
47  
48 guidelines stipulating that families should be supported and actively involved in psychiatric treatment [6-  
49  
50 11]. Families can encourage engagement with treatment plans, recognise and respond to early warning signs  
51  
52 of relapse [12] and assist in accessing services during period of crisis [13-15]. Family involvement can lead  
53  
54 to better outcomes from psychological therapies [16] and pharmacological treatments [17], fewer inpatient  
55  
56 admissions, shorter inpatient stays, and better quality of life reports by patients [18-21].  
57  
58  
59  
60

1  
2 However, despite the vast evidence base for Family Intervention [22-28] and Family Psychoeducation [29],  
3  
4 evidence suggests that family involvement is often not implemented in routine mental health care. There is  
5  
6 an abundance of both quantitative and qualitative studies into experiences of inpatient care reporting that  
7  
8 families feel marginalised and distanced from the care planning process. Common themes across  
9  
10 international studies indicate that families feel isolated, uninformed, lack a recognised role and are not  
11  
12 listened to or taken seriously [1 , 30-43]. Families also commonly report feeling that confidentiality is used  
13  
14 by professionals as a way to not share information [39 , 44]. Family Intervention as a treatment approach is  
15  
16 startlingly under-implemented, with extremely low numbers of families actually receiving it in clinical  
17  
18 services [11 , 45-47]. It is the case that for many, contact between professionals and families remains limited  
19  
20 to telephone calls during crisis periods [48].  
21  
22  
23  
24  
25

26  
27 Why is family involvement in treatment so under-applied? There has been much debate about the reasons  
28  
29 (e.g. [22 , 49-51]) and some suggest they are linked to general problems of implementing new evidence-  
30  
31 based practices in clinical services [29]. Other proposed barriers are more specific to family interventions,  
32  
33 such as the danger of increasing burden related to caregiving, role strain, lack of experience and/or interest  
34  
35 [52] and the complexities of navigating confidentiality [53]. Such discussions are largely speculative and  
36  
37 reviews of evidence tend to focus on the provision of specific interventions, such as Family Psychoeducation  
38  
39 [29] or Family Intervention [54]. This systematic review aims to assess how the involvement of families is  
40  
41 implemented in the treatment of patients with psychosis, taking a broad view of involvement as described  
42  
43 above in order to capture the barriers, problems and facilitating factors that operate in practice. In doing so,  
44  
45 this may help to better define and implement families' involvement in psychiatric treatment in the future.  
46  
47  
48  
49  
50

## 51 METHODS

52  
53 The full protocol for this systematic review is reported in the Supplementary file 1.  
54  
55  
56  
57

### 58 Identifying relevant studies

1  
2  
3  
4  
5  
6  
7  
8  
9  
10  
11  
12  
13  
14  
15  
16  
17  
18  
19  
20  
21  
22  
23  
24  
25  
26  
27  
28  
29  
30  
31  
32  
33  
34  
35  
36  
37  
38  
39  
40  
41  
42  
43  
44  
45  
46  
47  
48  
49  
50  
51  
52  
53  
54  
55  
56  
57  
58  
59  
60

Computerised databases were searched for eligible studies: MEDLINE, EMBASE, PsycINFO, AMED (via Ovid), BNI and CINAHL (via HILO), Social Sciences Citations Index (via Web of Knowledge) and CDSR, DARE and CENTRAL (via the Cochrane Library). Word groups representing patient diagnosis, intervention and involvement terms and outcome descriptors were combined in several ways. Strategies were adapted for each database, using controlled vocabulary (MeSH, Emtree, Thesaurus of Psychological Index Terms) and free text (see Supplementary File 2). The search was last repeated on 01/06/2014.

Publication bias was minimised by including conference papers and book chapters, searching grey literature for dissertations and reports (ETHOS, SIGL) and corresponding with authors to identify further works. Both backward snowballing (from the reference lists of included studies and identified reviews) and forward snowballing (finding citations to the papers) was conducted.

### Inclusion procedure

A study was eligible for inclusion if: 1) it was an original collection of data; 2) situated in primary or secondary mental health services; 3) the patient population included people being treated for psychotic disorders<sup>1</sup>; 4) the intervention involved tripartite communication between health professionals (any), families (unpaid carers) and adult patients, excluding those focused exclusively on professional–family communication, family-family communication or multiple-family groups; and 5) results described barriers, problems and/or facilitating factors in involving families in treatment. No study type was excluded, however only Latin-script languages were able to be translated.

‘Barriers’ were defined as factors that prevented an approach from taking place or limited the scope of it, ‘problems’ referred to issues that emerged when delivering an approach and ‘facilitating factors’ were considered to be any factors that aided implementation or delivery. ‘Family involvement’ was defined inclusively as any process allowing health professionals, families and patients to actively collaborate in treatment, such as in making joint treatment decisions. Studies not reporting clear information on how

---

<sup>1</sup> Attempts were made where possible to focus on patients with psychosis, however many studies used opportunity sampling of mixed ‘severe mental illness’ groups, which were included in order to be as inclusive as possible.



1 families were involved in treatment were excluded. Studies into general experiences, opinions, satisfaction  
2 or needs were also excluded, unless they related to a clearly described specific involvement in treatment.  
3  
4  
5

6  
7 Two reviewers (EE and DG) screened all of the titles and collected relevant abstracts. These were screened  
8 and then **excluded** if they did not fit the selection criteria. Studies that seemed to include relevant data or  
9 information were retrieved and their full text versions analysed and examined for study eligibility. All final  
10 full text choices were confirmed and agreed by both reviewers.  
11  
12  
13  
14

### 15 16 17 18 **Method of Analysis**

19 Data extraction and synthesis was guided by the *Economic and Social Research Council (ESRC)*'s Guidance  
20 on the Conduct of Narrative Synthesis in Systematic Reviews [55].  
21  
22  
23

24  
25  
26 The included studies used both qualitative and quantitative methods, yet clearly had conceptual overlaps  
27 despite reporting results in different formats. Any available quantitative data **were** usually descriptive,  
28 reported in addition to qualitative findings and **were** largely used to explore existing themes or concepts. It  
29 was therefore considered appropriate to transform quantitative findings into qualitative form to  
30 systematically identify the main concepts across the studies using thematic analysis [55 , 56]. The use of this  
31 method is increasingly being advocated with studies involving data that **are** quantitative or from mixed  
32 methods [56-58] to address questions relating to intervention need, appropriateness and acceptability in  
33 systematic reviews [59].  
34  
35  
36  
37  
38  
39  
40  
41  
42  
43  
44

### 45 46 47 **Data extraction and synthesis**

48  
49  
50 Theoretical Thematic Analysis [60] using inductive themes to identify the barriers, problems and **facilitating**  
51 **factors** of family involvement was used as a framework to explore further themes.  
52  
53  
54  
55  
56  
57  
58  
59  
60

1 Two non-clinician researchers (EE and AD) independently extracted author interpretations and participant  
2 data from the included studies using a piloted data extraction sheet. They then separately allocated the  
3 findings to relevant sections of the framework (e.g. 'Barriers according to staff perspectives') and coded the  
4 data within each section. Identified categories (e.g. 'Unsupportive attitudes of managers') were aggregated  
5 into subthemes (e.g. 'Attitudes towards family work') and finally became grouped under overarching themes  
6 (e.g. 'Context: Addressing Organisational Culture'). These emerging themes were discussed throughout  
7 analysis along with a clinician-researcher (DG), and discrepancies were resolved through iterative  
8 discussions. Robustness of the synthesis was investigated and themes were checked for completeness. Two  
9 clinician-researchers (DG and SP) acted as third party assessors of the final data synthesis.  
10  
11  
12  
13  
14  
15  
16  
17  
18  
19  
20  
21  
22

## 23 RESULTS

### 24 Included studies

25 Database searching produced 15615 titles to screen. After removing duplicates and irrelevant papers, a full  
26 text assessment of 119 documents was conducted. Twenty eight publications met our inclusion criteria and  
27 second stage searching including grey literature searching, personal correspondence and snowballing  
28 techniques led to the further identification and inclusion of 15 articles. This brought the final number of  
29 studies to 43. The PRISMA flowchart in Figure 1 depicts the identification and exclusion of articles.  
30  
31  
32  
33  
34  
35  
36  
37

38 (Insert Figure 1 here).  
39  
40  
41  
42

### 43 Overview of papers

44 Forty-two papers were published between 1991-2013 and one in 1978. Just over half of the studies were  
45 based on UK findings, with the rest from Finland, the USA, Italy, Australia, Canada, Germany, India,  
46 Ireland, New Zealand, Spain, Greece and Portugal. Mainly, papers reported on experiences of implementing  
47 Family Intervention approaches (n=33). Typically these followed a similar structure and were broadly  
48 modelled on the Behavioural Family Therapy approach [61] (see Supplementary File 3 for full study  
49 characteristics). This included variations such as 'Psychosocial Intervention' and 'Family Psychoeducation'  
50  
51  
52  
53  
54  
55  
56  
57  
58  
59  
60

1 that fit the model of a Family Intervention. The remainder explored Open Dialogue approaches (n=6),  
2 Systemic Psychotherapy (n=3) and one purely Behavioural Therapy programme. The vast majority were  
3 cross-sectional studies and 13 were naturalistic evaluations, descriptions or case studies of a service. In all,  
4 37 papers explored staff perspectives, eight papers featured patient perspectives and six featured 'family'  
5 perspectives. In total, the review included data of 588 professionals, 321 patients and 276 'family members'  
6 or 'families'.  
7  
8  
9  
10  
11  
12

### 13 **In depth review: Synthesis across studies**

14  
15  
16  
17  
18  
19  
20

21 Figure 2 summarises the final cross-study synthesis: the identified barriers/problems (in red) and **facilitating**  
22 **factors** (in green) and the themes in which they seemed to be operating. The themes closely relate to  
23 temporal sequencing in the process of delivering an intervention: the *context*, *engagement*, and then *delivery*.  
24 The figure provides a visual representation of the matches and gaps between barriers and **facilitating factors**  
25 related to involving families. This is for the most part conceptual, as barriers and their direct **facilitating**  
26 **factors** may not have been discussed in the same study. The themes and sub-themes are explored in greater  
27 detail in the synthesis below, which includes details of problems associated with delivering approaches that  
28 involve families as well as barriers and **facilitating factors** of this work.  
29  
30  
31  
32  
33  
34  
35  
36  
37  
38  
39  
40

41 (Insert Figure 2 here)  
42  
43  
44

### 45 **Context: Addressing the Organisational Culture**

46  
47

48 This theme reflects the majority of the findings, mostly from staff perspectives. Their experience of  
49 implementing family work could be characterised as working in relative isolation in a system where  
50 colleagues and managers did not value and prioritise family involvement or were openly hostile to it. With  
51 multi-disciplinary co-operation and working systems not in place, practical burdens associated with family  
52  
53  
54  
55  
56  
57  
58  
59  
60

1 work were sometimes insurmountable. Mirroring this, factors that enabled family involvement to take place  
2 were related to top-down management support, prioritisation and changing the culture of family work.  
3  
4

### 5 *Organisational Attitudes and Paradigms*

6  
7

8 This subtheme covered general attitudes, such as family involvement not being valued at organisational and  
9 team level but also highlighted possible entrenched reasons for this. For example, individualistic, biological  
10 paradigms made family work seem secondary or optional [62-64] and staff found it difficult to adopt a  
11 collaborative stance, relinquishing the role of didactic problem solver [63]. In some cases, it appeared that  
12 historical negative attitudes towards families had not shifted [62 , 64]. Anti-family work attitudes described  
13 amongst colleagues ranged from resistance towards the approaches [63 , 65-68] to well-intentioned but  
14 complicating beliefs regarding clinicians' duty towards the patient [64 , 69 , 70]. **Facilitating factors** related  
15 not only to specific strategies but to an overall shared culture and prioritisation of family work [64 , 71 , 72],  
16 shifting attitudes towards viewing the family as equal partners [71 , 73] and thinking more systemically  
17 about problems [71 , 74].  
18  
19  
20  
21  
22  
23  
24  
25  
26  
27  
28  
29

### 30 *Practical Needs Associated with Family Work*

31  
32  
33

34 Overwhelmingly, staff reported on the practical burdens of family work: that it requires time, resources and  
35 funding and is difficult to integrate with other clinical casework [62 , 64-70 , 73 , 75-87], particularly in  
36 areas with high demands and clinical crises [73 , 82 , 83]. Specific needs reported for family work included  
37 flexible hours [64 , 65 , 67 , 70 , 80 , 82-84 , 87-90] and the accommodation of family requirements such as  
38 childcare facilities [80] or home visits [82 , 89 , 91]. A lack of systems and structure for carrying out and  
39 recording family work was also reported as a barrier to implementation and problem during delivery [63 , 87  
40 , 92]. This included a lack of co-ordination between inpatient and outpatient care [62]. These issues were  
41 compounded by reports of services and managers not making time allowances for family work, e.g. not  
42 providing time in lieu for out of hours work [64 , 65 , 77 , 83 , 84], or obstructing time use, e.g. by refusing  
43 the release of staff for training [63].  
44  
45  
46  
47  
48  
49  
50  
51  
52  
53  
54  
55

### 56 *Management Culture*

57  
58  
59  
60

1 Commonly, staff reported on the unsupportive attitudes of managers and colleagues as limiting the  
2 implementation of family involvement [63 , 64 , 66 , 77-79 , 87 , 92 , 93]. This ranged from a “*management*  
3 *culture of benign neglect rather than of active opposition*” [93] to overt challenges such as not respecting  
4 ring-fenced time for family work [87]. The strongest facilitator seemed to be that of strong leadership  
5 through senior management support and developing strategic solutions. This “sanctioned” family work,  
6 giving it core priority status within the service [64], and could facilitate specific powerful initiatives such as  
7 writing family work into business plans, policies and job descriptions of all staff [63 , 79]. Further  
8 endorsement came from providing flexible hours, creating new staff roles and financial provision [63 , 73 ,  
9 79 , 94]. The value emerged of having regular multi-disciplinary meetings to address team-specific needs  
10 [72 , 78 , 79 , 88] and developing strategies that prioritised family work and made it a part of regular clinical  
11 practice [63 , 72 , 73 , 79 , 88 , 94]. This included having routine assessment of all families, asking clinicians  
12 about families when reviewing caseloads and providing regular feedback of family data to teams and  
13 managers [63 , 94].  
14  
15  
16  
17  
18  
19  
20  
21  
22  
23  
24  
25  
26  
27  
28  
29

### 30 *Training Needs*

31  
32 Staff also reported on lacking access to adequate supervision and training [62 , 63 , 65 , 66 , 83 , 86 , 87 , 92]  
33 as barriers to implementation. This may link with reports of staff lacking skills or confidence to do the work  
34 [62 , 64 , 85 , 86 , 92]. Some problems during delivery (such as managing family dynamics [64 , 65 , 70 , 74  
35 , 78 , 88 , 95]) could also be related to staff skills and experience [71 , 78 , 81]. As expected, having a  
36 structured regime of supervision, encouraging attendance and ongoing support was described as helping  
37 staff to deliver work with families [63 , 72 , 78 , 79 , 88]. Staff also reported on the value of belief in the  
38 approach and having an identity in their role [71 , 72 , 79 , 81 , 86].  
39  
40  
41  
42  
43  
44  
45  
46  
47  
48

### 49 *Team Attitudes, Commitment and Multi-disciplinary Co-operation*

50  
51 Difficulties arose when only a minority of team members had been trained in an intervention [82]. Staff  
52 reported that collaboration was often lacking [63 , 65 , 69 , 73 , 77 , 80] and that involving families requires  
53 whole team commitment [76 , 82]. ‘Ownership’ was sometimes an issue, with various staff groups  
54  
55  
56  
57  
58  
59  
60

1  
2  
3  
4  
5  
6  
7  
8  
9  
10  
11  
12  
13  
14  
15  
16  
17  
18  
19  
20  
21  
22  
23  
24  
25  
26  
27  
28  
29  
30  
31  
32  
33  
34  
35  
36  
37  
38  
39  
40  
41  
42  
43  
44  
45  
46  
47  
48  
49  
50  
51  
52  
53  
54  
55  
56  
57  
58  
59  
60

perceiving family work as within the domain of other roles, not theirs [69 , 80]. Role and team-specific issues also emerged, such as psychiatrists, inpatient staff and home treatment teams being less involved [63 , 66 , 73 , 81]. Collaboration in the form of multi-disciplinary co-working, peer-supervision and whole team approaches were all reported as aids to implementing family work [63 , 66 , 71-74 , 78 , 79 , 82 , 88].

Problems with finding ‘appropriate’ referrals were reported widely [65 , 67 , 68 , 77 , 78 , 80 , 82 , 83 , 93]. Whilst some patients do not have families, the pervasiveness of this response also called into question staff members’ pre-existing ideas about what constitutes an ‘appropriate’ family for intervention. Staff reported the resistance of other professionals to make referrals [67 , 88], family work services being “forgotten” and referrals being made as a “last resort”, by which time the families themselves may have grown resistant [93]. Acting as a facilitator was the promotion of family work, both as a cascading effect through colleagues and across services [64 , 79 , 87].

### ***Engagement: Addressing Concerns through Openness, Encouragement and Building Alliances***

The next theme related to the process of engagement, informed more broadly by both staff and family responses. A picture emerged of families sometimes being reluctant to engage, and of valid concerns. Yet the successful establishment of trusting relationships indicates these concerns may be surmountable in many cases.

#### *Reservations about Involving Families*

Similar issues around the nature of involving families emerged as a barrier to families becoming involved and as problems during treatment. Some concerns seemed linked to fears around power and control: bi-directional privacy concerns (keeping the extent of the illness from the family and **keeping** family issues from services) [70] and patients’ fears of placing relatives in a position of power [70 , 95] or **of** exposing **their** vulnerability [75]. Responses in all three participant groups addressed the need for an exclusive patient-

1 professional relationship [69 , 70 , 76 , 95]. Existing individual and family problems (such as patients'  
2 symptoms being directed at family members [62]) also precluded family involvement. Both families and  
3 staff expressed fears of making the current situation worse, such as by burdening the family and worsening  
4 the patient's symptoms [70 , 80 , 84 , 86 , 91]. Professionals described building trust and rapport, through  
5 open discussions with the family, acknowledging concerns and providing reassurance [71 , 74 , 88 , 91].  
6  
7  
8  
9  
10

### 11 *Problems Engaging Families*

12 These were often unspecified as scepticism, lack of motivation or refusal from the families, occurring prior  
13 to engagement or during treatment [65 , 76 , 78 , 83 , 84 , 88 , 93 , 96]. As professional responses, these may  
14 reflect their attitudes towards families as unmotivated, but **could** also describe the failure of the team to  
15 mobilise the family in favour of treatment [96]. A factor described as a facilitator was having a critical  
16 period of engagement: intensive efforts at contact and involvement early on after contact with services [93 ,  
17 96-99] and presenting the approach enthusiastically [71 , 89] functioned to establish collaborative  
18 relationships between families and professionals as the modus operandi.  
19  
20  
21  
22  
23  
24  
25  
26  
27  
28  
29  
30  
31  
32  
33

### 34 *Delivery: Active Collaboration, Professional Skills and Respect for Families as Individuals*

35 The final theme related to factors that affected how staff members delivered family interventions and how  
36 families experienced them. As a whole, both family and staff responses highlight the **importance** of  
37 respectful, equal partnership, enhanced by professional skills and experience.  
38  
39  
40  
41  
42  
43  
44  
45

### 46 *Working Relationships **between** Families and Professionals*

47 Collaboration between families and professionals on an equal footing appeared valued by both families and  
48 professionals. Lack of collaboration was cited as a problem during delivery, resulting in families feeling  
49 patronised or not understood [76]. Open Dialogue papers particularly emphasised the lack of success when  
50 actions were unilaterally decided, rather than emerging from a joint process [74 , 99]. Factors helping to  
51 overcome this included being able to relinquish control, i.e. tolerate uncertainty in order to allow a joint  
52  
53  
54  
55  
56  
57  
58  
59  
60



1 solution to emerge [78 , 96 , 98-100], approaching the family on an equal basis [71] and actively  
2 collaborating with families during meetings [66 , 71 , 89 , 92 , 96].  
3  
4  
5

6 How families experienced an approach closely linked with their experience of the professional. Some  
7 families reported experiencing an approach as negative or critical, both through the model itself e.g. its  
8 characterisation of illness [101], or experiences of the professional, perhaps as criticising parenting [101 ,  
9 102]. Yet, the interpersonal qualities of the professional and the establishment of a therapeutic alliance  
10 strongly emerged as **facilitating factors**: professionals being informed, genuine, warm, non-blaming [71 , 89  
11 , 101] and demonstrating an awareness and understanding of the problems of the whole family [71 , 79 , 89 ,  
12 90 , 99].  
13  
14  
15  
16  
17  
18  
19  
20  
21  
22  
23

24 A lack of continuity was cited as a problem [99], whilst a facilitator was having the same team involved  
25 from the beginning and staying with the family throughout the treatment process [96 , 98 , 99].  
26  
27  
28  
29  
30

### 31 *Individualisation within the approach*

32 Approaches were sometimes described as culturally insensitive [76 , 88]: rigid, manualised approaches did  
33 not meet the general needs of particular groups whilst individual needs, such as illiteracy, were sometimes  
34 not catered to [64 , 76 , 97 , 103]. Professionals and families valued having a clear structure whilst allowing  
35 for flexibility [71 , 76 , 88 , 99]. Professionals' skills were also important, by way of communicating  
36 information in an easy-to-understand format, avoiding jargon [71 , 88 , 89 , 99] and developing an  
37 individualised and contextualised approach [71 , 76 , 88 , 93 , 99].  
38  
39  
40  
41  
42  
43  
44  
45  
46  
47  
48

### 49 *Working with Complex Needs*

50 Professionals highlighted the complexities of working both with families and with patients with psychosis.  
51 The difficulties of managing patient symptoms and working in a meaningful way with their beliefs [73 ,  
52 104] may be compounded by family dynamics [64 , 65 , 70 , 74 , 78 , 88 , 95 , 104] and potentially relatives'  
53 own emotional and affective problems [104]. Staff members' qualities, skills and experience in the area  
54  
55  
56  
57  
58  
59  
60

1 were naturally described as **facilitating factors** [71 , 76 , 78 , 79 , 81 , 83 , 89 , 90 , 100]. Perhaps  
2 unsurprisingly, useful skills were described as working creatively to overcome barriers, hypothesising,  
3 reflecting and persevering [71 , 79 , 100].  
4  
5  
6  
7

## 8 **DISCUSSION**

### 9 **Main findings**

10 Our results suggest that having ‘top-down’ support and training **some staff members** to **carry out** family  
11 work is **necessary** but not sufficient. In order to effectively implement family involvement in care, all  
12 members of a clinical team should be trained and regularly supervised and a ‘whole team approach’ should  
13 be used. Developing a clear structure for the intervention may be beneficial for the delivery of family  
14 involvement, provided that flexibility to accommodate individual needs is ensured. Concerns emerged  
15 regarding privacy, power relations, fear of negative outcomes and the need for an exclusive patient-  
16 professional relationship. Exploring and acknowledging such concerns through open, yet non-judgemental  
17 communication could facilitate the establishment of a therapeutic alliance between staff, families and  
18 patients.  
19  
20  
21  
22  
23  
24  
25  
26  
27  
28  
29  
30  
31  
32  
33  
34  
35  
36

37 **These** findings may help to explain why family interventions – despite their overwhelming evidence base  
38 and their inclusion in practically all policies and guidelines – are so poorly implemented in routine practice.  
39 The requirements identified may be challenging given that family-oriented practice may need to be  
40 embraced by a whole organisation and included in work routines in order to be implemented.  
41  
42  
43  
44  
45  
46  
47

### 48 **Strengths and limitations**

49 To our knowledge, this is the first systematic review that specifically focused on barriers, problems and  
50 **facilitating factors** **for the** implementation of family involvement in the treatment of patients with psychosis.  
51 This is of **high** importance given the current climate of government policies and psychiatric guidelines  
52 stipulating that families should be supported and actively involved in psychiatric treatment [6-11], and the  
53  
54  
55  
56  
57  
58  
59  
60

1  
2  
3  
4  
5  
6  
7  
8  
9  
10  
11  
12  
13  
14  
15  
16  
17  
18  
19  
20  
21  
22  
23  
24  
25  
26  
27  
28  
29  
30  
31  
32  
33  
34  
35  
36  
37  
38  
39  
40  
41  
42  
43  
44  
45  
46  
47  
48  
49  
50  
51  
52  
53  
54  
55  
56  
57  
58  
59  
60

disappointments in achieving this in practice so far. The search strategy allowed for the capture of a large number of studies, different researchers independently extracted and reviewed the data and when necessary authors were contacted to clarify ambiguous information. The use of thematic analysis, described as having the “most potential for hypothesis generation” [108], allowed for understanding the larger picture, which is more than the sum of **its** findings. Whilst interpretative, this process has been carried out in accordance with RATS guidelines [61] and presented transparently. Though some themes were not highly recurrent -for example criticisms of manualisation emerged only in structured approaches such as Behavioural Family Therapy- in all, findings were complimentary, not contradictory. The fact that common themes emerged in spite of variations in approach, **across 16 countries**, speaks for the robustness of the findings as representing shared issues with family involvement.

However a number of limitations must be considered **when** interpreting the results of this study. Methodologically, conducting sub-group analysis, i.e. for different intervention models, was not considered viable due to the strong association between type of approach and methodology used e.g. Open Dialogue with case studies and Behavioural Family Therapy with the Family Intervention Schedule (FIS) questionnaire. Carrying out a sub-group analysis may have therefore had the risk of mischaracterising certain approaches due to variation in the richness of data. Whilst there are well-established methods for assessing the quality of intervention studies, this is not the case for studies of implementation processes, qualitative or mixed methods research [56] and the use of appraisal tools in qualitative research remains contentious [109, 110]. The decision not to use quality-based analysis was therefore also based on recognition of the important contribution and explanatory value that descriptive accounts offer. Despite efforts to find grey literature, the search strategy may still have been limited in its bias towards published research, yet the nature of this review topic means that service level audits and evaluations are likely to be of relevance. Conceptually, the dominance of staff and academic perspectives may have led to barriers within the organisation being explored most thoroughly, however does not lead to the conclusion that there are no inherent problems with involving families in clinical settings.

### Comparison with available literature and implications for practice

Our findings reflect important key features for implementation of evidence based practices, already identified in previous research in implementation science, such as top-down input and leadership and the need for continuing consultation and training [105]. The presence of management and leadership decisions and strategies operating as barriers and **facilitating factors** throughout the organisational context –both directly and indirectly– aligns with findings that leadership at all levels (e.g. executive director, middle manager, clinical supervisor) is associated with innovation [106], implementation of evidence based practice (EBP) [107], and with improving the organisational context for EBP implementation [108]. **The need for support from senior managers (and commissioners) and for a whole team approach is also reflected in the suggestions on how to implement family work in mental health services provided by professionals and carers with experience of participating in a Family Behavioural Therapy Programme, [109].**

The fundamental role of the organisational context is emphasised in the literature with both culture (the normative beliefs and shared expectations of the organisation) and organisational climate (the psychological impact of the work environment on the professional) strongly moderating the uptake of evidence based practices [110]. The practice to be implemented must match the mission, values, tasks and duties of the **organisation** and individuals within that **organisation** [111]. The absence of a strong organisational culture favouring family work may be influenced by traditional paradigms based on the predominance of biological models of mental illness, which tend to minimise the focus on the individual's social context [50]. Also, the characterisations of families as dysfunctional and sometimes even as 'the cause of psychiatric illness,' despite being widely rejected [112], may have contributed to a loss of trust in services and strained relationships between professionals and families [113]. This may explain the importance and the effort required in building alliances, which emerged in our findings. Clinicians may uphold the patient-professional alliance by addressing concerns regarding privacy and by being mindful that patients do not perceive a loss of power due to having family involvement in their care.

### Future directions for research

1 So far the findings largely reflect what can go wrong rather than provide evidence of successful  
2 implementation. For example, sustainability has not been addressed in the review as this stage has hardly  
3 been reached. More research will be needed to see which organisational steps can actually change the  
4 culture in a service so that family involvement happens, not only in a research study or with particular  
5 patients, but with all families, every day, and over longer periods of time.  
6  
7  
8  
9

10  
11  
12  
13 Future studies should attempt to better capture wider views, particularly in-depth understanding of patients'  
14 and families' views. This may also enable insight into the potentially varied experiences of minority groups.  
15 These views may be best obtained outside of group interviews, in which a power imbalance may be present.  
16 There would also be value in exploring the views of professionals who have not already demonstrated  
17 commitment to family work.  
18  
19  
20  
21  
22  
23  
24

25 Despite a 'whole team approach' seeming to be the way forward for a widespread implementation of family  
26 work, there is a need to obtain insight into the organisational challenges that may be related to this and to  
27 develop clear practical guidelines for the reorganisation of clinical teams.  
28  
29  
30  
31  
32  
33  
34  
35  
36  
37  
38

39 **Funding:** The research was partially funded by the National Institute for Health (NIHR) Research  
40 Collaboration for Leadership in Applied Health Research and Care (CLAHRC) North Thames at Barts  
41 Health NHS Trust.  
42  
43  
44  
45  
46  
47  
48

49 **Competing interests:** The authors declare they have no competing interests.  
50  
51  
52  
53  
54

55 **Authors' contributions:** DG, EE and SP contributed to the conception and design of the study. EE designed  
56 and conducted the search, DG and EE selected the studies. AD and EE extracted data and carried out the  
57  
58  
59  
60

1 thematic synthesis. EE wrote the manuscript, AD and DG reviewed and edited the manuscript and SP  
2 provided critical review of the manuscript. All authors contributed to and approved the final submitted  
3  
4 version.  
5  
6  
7  
8  
9

10 **Acknowledgements:** None  
11  
12  
13

14  
15  
16 **Data Sharing Statements:** No additional data available  
17  
18  
19  
20  
21  
22  
23  
24  
25  
26  
27  
28  
29  
30  
31  
32  
33  
34  
35  
36  
37  
38  
39  
40  
41  
42  
43  
44  
45  
46  
47  
48  
49  
50  
51  
52  
53  
54  
55  
56  
57  
58  
59  
60

## REFERENCES

1. Clarke C. Relating with professionals. *Journal of Psychiatric and Mental Health Nursing* 2006;**13**(5):522-26
2. Parker G, Clarke H. Making the ends meet: do carers and disabled people have a common agenda? *Policy & Politics* 2002;**30**(3):347-59
3. Thornicroft G, Tansella M. Growing recognition of the importance of service user involvement in mental health service planning and evaluation. *Epidemiologia E Psichiatria Sociale* 2005;**14**(01):1-3
4. Guberman N, Nicholas E, Nolan M, et al. Impacts on practitioners of using research-based carer assessment tools: experiences from the UK, Canada and Sweden, with insights from Australia. *Health & Social Care in the Community* 2003;**11**(4):345-55
5. Mottaghypour Y, Bickerton A. The Pyramid of Family Care: A framework for family involvement with adult mental health services. *Advances in Mental Health* 2005;**4**(3):210-17
6. Australian Government. Carer Recognition Act 2010. Australia: Australian Government, 2010.
7. Department of Health. Recognised, valued and supported: Next steps for the Carers Strategy. London: HMSO, 2010.
8. Substance Abuse and Mental Health Services Administration (SAMHSA). Family psychoeducation: How to use the evidence-based practices KITS. Rockville, MD: U.S. Department of Health and Human Services, 2009.
9. National Institute for Mental Health in England. NIMHE Guiding Statement on Recovery: Department of Health, 2005.
10. National Collaborating Centre for Mental Health. Psychosis and schizophrenia in adults: treatment and management NICE clinical guideline 178: National Institute for Health and Care Excellence, 2014.
11. Schizophrenia Commission (Rethink). The abandoned illness: a report from Schizophrenia Commission, 2012.
12. Herz MI, Lamberti JS, Mintz J, et al. A program for relapse prevention in schizophrenia: a controlled study. *Archives of General Psychiatry* 2000;**57**(3):277-83
13. Fridgen GJ, Aston J, Gschwandtner U, et al. Help-seeking and pathways to care in the early stages of psychosis. *Social Psychiatry and Psychiatric Epidemiology* 2013;**48**(7):1033-43
14. Bergner E, Leiner AS, Carter T, et al. The period of untreated psychosis before treatment initiation: A qualitative study of family members' perspectives. *Comprehensive Psychiatry* 2008;**49**(6):530-36 doi: 10.1016/j.comppsy.2008.02.010[published Online First: Epub Date] |.
15. Morgan C, Fearon P, Hutchinson G, et al. Duration of untreated psychosis and ethnicity in the AESOP first-onset psychosis study. *Psychological Medicine* 2006;**36**(2):239-48
16. Garety PA, Fowler DG, Freeman D, et al. Risk of harm after psychological intervention: Authors' reply. *The British Journal of Psychiatry* 2008;**193**(4):345-46
17. Glick ID, Stekoll AH, Hays S. The role of the family and improvement in treatment maintenance, adherence, and outcome for schizophrenia. *Journal of Clinical Psychopharmacology* 2011;**31**(1):82-85
18. Schofield N, Quinn J, Haddock G, et al. Schizophrenia and substance misuse problems: a comparison between patients with and without significant carer contact. *Social Psychiatry and Psychiatric Epidemiology* 2001;**36**(11):523-28 doi: 10.1007/s001270170001[published Online First: Epub Date] |.
19. Fleury M-J, Grenier G, Caron J, et al. Patients' report of help provided by relatives and services to meet their needs. *Community Mental Health Journal* 2008;**44**(4):271-81
20. Norman RM, Malla AK, Manchanda R, et al. Social support and three-year symptom and admission outcomes for first episode psychosis. *Schizophrenia Research* 2005;**80**(2):227-34
21. Tempier R, Balbuena L, Lepnurm M, et al. Perceived emotional support in remission: results from an 18-month follow-up of patients with early episode psychosis. *Social Psychiatry and Psychiatric Epidemiology* 2013;**48**(12):1897-904
22. Murray-Swank AB, Dixon L. Family psychoeducation as an evidence-based practice. *Cns Spectrums* 2004
23. Pfammatter M, Junghan UM, Brenner HD. Efficacy of psychological therapy in schizophrenia: Conclusions from meta-analyses. *Schizophrenia Bulletin* 2006;**32**:S64-S80 doi: 10.1093/schbul/sb1030[published Online First: Epub Date] |.
24. Pharoah F, Mari J, Rathbone J, et al. Family intervention for schizophrenia. *Cochrane database of systematic reviews (Online)* 2010;**12**:CD000088
25. Pitschel-Walz G, Leucht S, Bäuml J, et al. The effect of family interventions on relapse and rehospitalization in schizophrenia: a meta-analysis. *FOCUS: The Journal of Lifelong Learning in Psychiatry* 2004;**2**(1):78-94



- 1 26. Pilling S, Bebbington P, Kuipers E, et al. Psychological treatments in schizophrenia: I. Meta-analysis of family  
2 intervention and cognitive behaviour therapy. *Psychological Medicine* 2002;**32**(5):763-82
- 3 27. National Collaborating Centre for Mental Health. Schizophrenia: core interventions in the treatment and  
4 management of schizophrenia in primary and secondary care (update): British Psychological Society, 2009.
- 5 28. Marshall M, Rathbone J. Early intervention for psychosis. *Cochrane Database of Systematic Reviews*  
6 2011(6):CD004718-NaN
- 7 29. Lucksted A, McFarlane W, Downing D, et al. Recent developments in family psychoeducation as an  
8 evidence-based practice. *Journal of Marital and Family Therapy* 2012;**38**(1):101-21
- 9 30. Cleary M, Freeman A, Hunt GE, et al. What patients and carers want to know: an exploration of information and  
10 resource needs in adult mental health services. *Australian and New Zealand Journal of Psychiatry*  
11 2005;**39**(6):507-13 doi: 10.1080/j.1440-1614.2005.01611.x[published Online First: Epub Date]].
- 12 31. Jubb M, Shanley E. Family involvement: The key to opening locked wards and closed minds. *International Journal*  
13 *of Mental Health Nursing* 2002;**11**(1):47-53
- 14 32. O'Brien L, Cole R. Mental health nursing practice in acute psychiatric close-observation areas. *International*  
15 *Journal of Mental Health Nursing* 2004;**13**(2):89-99
- 16 33. Rose LE, Mallinson RK, Walton-Moss B. Barriers to family care in psychiatric settings. *Journal of Nursing*  
17 *Scholarship* 2004;**36**(1):39-47
- 18 34. Longo S, Scior K. In-patient psychiatric care for individuals with intellectual disabilities: the service users' and  
19 carers' perspectives. *Journal of Mental Health* 2004;**13**(2):211-21
- 20 35. Hodgson O, King R, Leggatt M. Carers of mentally ill people in Queensland: Their perceived relationships with  
21 professional mental health service providers: Report on a survey. *Advances in Mental Health* 2002;**1**(3):220-  
22 34
- 23 36. Lammers J, Happell B. Mental health reforms and their impact on consumer and carer participation: a  
24 perspective from Victoria, Australia. *Issues in Mental Health Nursing* 2004;**25**(3):261-76
- 25 37. Keeley B, Clarke M. *Carers speak out project: report on findings and recommendations*: Princess Royal Trust for  
26 Carers London, 2002.
- 27 38. Wilkinson C, McAndrew S. 'I'm not an outsider, I'm his mother!' A phenomenological enquiry into carer  
28 experiences of exclusion from acute psychiatric settings. *International Journal of Mental Health Nursing*  
29 2008;**17**(6):392-401 doi: 10.1111/j.1447-0349.2008.00574.x[published Online First: Epub Date]].
- 30 39. Askey R, Holmshaw J, Gamble C, et al. What do carers of people with psychosis need from mental health  
31 services? Exploring the views of carers, service users and professionals. *Journal of Family Therapy*  
32 2009;**31**(3):310-31
- 33 40. Pinfold V, Corry P. Who cares? The experiences of mental health carers accessing services and information.  
34 Kingston-upon-Thames: Rethink 2003
- 35 41. Pinfold V, Farmer P, Rapaport J, et al. Positive and inclusive. Effective Ways for Professionals to Involve Carers in  
36 Information Sharing. Report to the National Co-ordinating Centre for NHS Service Delivery and Organisation  
37 R & D (NCCSDO) 2004
- 38 42. Repper J, Grant G, Nolan M, et al. Carers' views on, and experiences of mental health services and carer  
39 assessments: the results of a consultation exercise. Partnerships in Carer Assessment Project. School of  
40 Nursing and Midwifery, University of Sheffield 2005
- 41 43. Walsh J, Boyle J. Improving acute psychiatric hospital services according to inpatient experiences. A user-led  
42 piece of research as a means to empowerment. *Issues in Mental Health Nursing* 2009;**30**(1):31-38
- 43 44. Rethink. Who Cares? The Experience of Mental Health Carers Accessing Services and Information. London:  
44 Rethink Publications, 2003.
- 45 45. Glynn SM. Family interventions in schizophrenia: Promise and pitfalls over 30 years. *Current Psychiatry Reports*  
46 2012;**14**(3):237-43
- 47 46. Dixon L, McFarlane WR, Lefley H, et al. Evidence-based practices for services to families of people with  
48 psychiatric disabilities. *Psychiatric Services* 2001;**52**(7):903-10
- 49 47. Berry K, Haddock G. The implementation of the NICE guidelines for schizophrenia: Barriers to the implementation  
50 of psychological interventions and recommendations for the future. *Psychology and Psychotherapy-Theory*  
51 *Research and Practice* 2008;**81**:419-36 doi: 10.1348/147608308x329540[published Online First: Epub Date]].
- 52 48. Kim H, Salyers MP. Attitudes and perceived barriers to working with families of persons with severe mental  
53 illness: mental health professionals' perspectives. *Community Mental Health Journal* 2008;**44**(5):337-46
- 54 49. Cohen A, Glynn S, Murray-Swank A, et al. The Family Forum: directions for the implementation of family  
55 psychoeducation for severe mental illness. *Psychiatric Services* 2008;**59**(1):40-48

50. Glynn SM, Cohen AN, Dixon LB, et al. The potential impact of the recovery movement on family interventions for schizophrenia: opportunities and obstacles. *Schizophrenia Bulletin* 2006;**32**(3):451-63
51. Prytys M, Garety P, Jolley S, et al. Implementing the NICE guideline for schizophrenia recommendations for psychological therapies: a qualitative analysis of the attitudes of CMHT staff. *Clinical Psychology & Psychotherapy* 2011;**18**(1):48-59
52. Simpson E, House A. User and carer involvement in mental health services: from rhetoric to science. *The British Journal of Psychiatry* 2003;**183**(2):89-91
53. Slade M, Pinfold V, Rapaport J, et al. Best practice when service users do not consent to sharing information with carers National multimethod study. *The British Journal of Psychiatry* 2007;**190**(2):148-55
54. Mairs H, Bradshaw T. Implementing family intervention following training: what can the matter be? *Journal of Psychiatric and Mental Health Nursing* 2005;**12**(4):488-94
55. Popay J, Roberts H, Sowden A, et al. Guidance on the conduct of narrative synthesis in systematic reviews. A product from the ESRC Methods Programme. Version 2006;**1**
56. Mays N, Pope C, Popay J. Systematically reviewing qualitative and quantitative evidence to inform management and policy-making in the health field. *Journal of Health Services Research & Policy* 2005;**10**(suppl 1):6-20
57. Barnett-Page E, Thomas J. Methods for the synthesis of qualitative research: a critical review. *Bmc Medical Research Methodology* 2009;**9**(1):59
58. Dixon-Woods M, Agarwal S, Jones D, et al. Synthesising qualitative and quantitative evidence: a review of possible methods. *Journal of Health Services Research & Policy* 2005;**10**(1):45-53B
59. Thomas J, Harden A. Methods for the thematic synthesis of qualitative research in systematic reviews. *Bmc Medical Research Methodology* 2008;**8**(1):45
60. Braun V, Clarke V. Using thematic analysis in psychology. *Qualitative research in psychology* 2006;**3**(2):77-101
61. Clark J. How to peer review a qualitative manuscript. *Peer review in health sciences* 2003;**2**:219-35
62. Brent BK, Giuliano AJ. Psychotic-spectrum illness and family-based treatments: A case-based illustration of the underuse of family interventions. *Harvard Review of Psychiatry* 2007;**15**(4):161-68
63. Fadden G. Overcoming Barriers to Staff Offering Family Interventions in the NHS. A Casebook of Family Interventions for Psychosis 2009:309
64. Fadden G, Birchwood M, Lefley H, et al. British models for expanding family psychoeducation in routine practice. *Family Interventions in Mental Illness: International Perspectives*. Praeger, Westport, CT 2002:25-41
65. Brennan G, Gamble C. Schizophrenia family work and clinical practice. *Mental Health Nursing-London-Community Psychiatric Nurses Association* 1997;**17**:12-16
66. Brooker C, Butterworth C. Working with families caring for a relative with schizophrenia: the evolving role of the community psychiatric nurse. *International Journal of Nursing Studies* 1991;**28**(2):189-200
67. Del Vecchio V, Luciano M, Malangone C, et al. Implementing family psychoeducational intervention for bipolar I disorder in 17 Italian Mental Health Centres. *Giornale Italiano di Psicopatologia / Italian Journal of Psychopathology* 2011;**17**(3):277-82
68. Butler MP, Begley M, Parahoo K, et al. Getting psychosocial interventions into mental health nursing practice: a survey of skill use and perceived benefits to service users. *Journal of Advanced Nursing* 2014;**70**(4):866-77 doi: 10.1111/jan.12248[published Online First: Epub Date]].
69. Goudreau J, Duhamel F, Ricard N. The impact of a family systems nursing educational program on the practice of psychiatric nurses - A pilot study. *Journal of Family Nursing* 2006;**12**(3):292-306 doi: 10.1177/1074840706291694[published Online First: Epub Date]].
70. Peters S, Pontin E, Lobban F, et al. Involving relatives in relapse prevention for bipolar disorder: a multi-perspective qualitative study of value and barriers. *Bmc Psychiatry* 2011. <http://onlinelibrary.wiley.com/o/cochrane/clcentral/articles/341/CN-00851341/frame.html>.
71. James C, Cushway D, Fadden G. What works in engagement of families in behavioural family therapy? A positive model from the therapist perspective. *Journal of Mental Health* 2006;**15**(3):355-69
72. Kelly M, Galvin K. Does a cross-educational practice meeting assist Thorn graduates to implement psychosocial interventions into clinical practice? *Journal of Mental Health Training, Education and Practice, The* 2010;**5**(4):18-26
73. Haun MW, Kordy H, Ochs M, et al. Family systems psychiatry in an acute in-patient setting: the implementation and sustainability 5 years after its introduction. *Journal of Family Therapy* 2013;**35**(2):159-75 doi: 10.1111/j.1467-6427.2012.00586.x[published Online First: Epub Date]].
74. Seikkula J. When the boundary opens: family and hospital in co-evolution. *Journal of Family Therapy* 1994;**16**(4):401-14

- 1  
2  
3  
4  
5  
6  
7  
8  
9  
10  
11  
12  
13  
14  
15  
16  
17  
18  
19  
20  
21  
22  
23  
24  
25  
26  
27  
28  
29  
30  
31  
32  
33  
34  
35  
36  
37  
38  
39  
40  
41  
42  
43  
44  
45  
46  
47  
48  
49  
50  
51  
52  
53  
54  
55  
56  
57  
58  
59  
60
75. Allen J, Burbach F, Reibstein J. 'A different world' individuals' experience of an integrated family intervention for psychosis and its contribution to recovery. *Psychology & Psychotherapy: Theory, Research & Practice* 2013;**86**(2):212-28
76. Allen RES, Read J. Integrated mental health care: practitioners' perspectives. *Australian and New Zealand Journal of Psychiatry* 1997;**31**(4):496-503 doi: 10.3109/00048679709065071[published Online First: Epub Date]].
77. Baguley I, Butterworth A, Fahy K, et al. Bringing into clinical practice skills shown to be effective in research settings: A follow-up of 'Thorn Training' in psychosocial family interventions for psychosis. *Psychosis: Psychological approaches and their effectiveness*. London, England: Gaskell/Royal College of Psychiatrists; England, 2000:96-119.
78. Bailey R, Burbach FR, Lea SJ. The ability of staff trained in family interventions to implement the approach in routine clinical practice. *Journal of Mental Health* 2003;**12**(2):131-42
79. Fadden G, Heelis R, Bisnauth R. Training mental health care professionals in behavioural family therapy: an audit of trainers' experiences in the West Midlands. *Journal of Mental Health Training, Education and Practice, The* 2010;**5**(2):27-35
80. Cohen A, Glynn S, Young A, et al. Implementing family services at mental health clinics. *Journal of General Internal Medicine* 2010;**25**:S305-S06
81. De La Higuera Romero J, Ramirez Ruiz RM. Implementation of family psycho-educational programs in clinical practice: Analysis of an experience. *Apuntes de Psicología* 2011;**29**(1):71-85
82. Fadden G. Implementation of family interventions in routine clinical practice following staff training programs: a major cause for concern. *Journal of Mental Health* 1997;**6**(6):599-613
83. Kavanagh DJ, Clark D, Manicavasagar V, et al. Application of cognitive-behavioral family intervention for schizophrenia in multidisciplinary teams - what can the matter be. *Australian Psychologist* 1993;**28**(3):181-88 doi: 10.1080/00050069308258899[published Online First: Epub Date]].
84. Magliano L, Fiorillo A, Fadden G, et al. Effectiveness of a psychoeducational intervention for families of patients with schizophrenia: preliminary results of a study funded by the European Commission. *World Psychiatry* 2005;**4**(1):45
85. Magliano L, Fiorillo A, Malangone C, et al. Implementing psychoeducational interventions in Italy for patients with schizophrenia and their families. *Psychiatric Services* 2006;**57**(2):266-70
86. Michie S, Pilling S, Garety P, et al. Difficulties implementing a mental health guideline: an exploratory investigation using psychological theory. *Implementation Science* 2007;**2** doi: 10.1186/1748-5908-2-8[published Online First: Epub Date]].
87. Murphy N. Development of family interventions: a 9-month pilot study. *British Journal of Nursing* 2007;**16**(15):948
88. Balaji M, Chatterjee S, Koschorke M, et al. The development of a lay health worker delivered collaborative community based intervention for people with schizophrenia in India. *Bmc Health Services Research* 2012;**12**:42
89. Campbell A. How was it for you? Families' experiences of receiving Behavioural Family Therapy. *Journal of Psychiatric and Mental Health Nursing* 2004;**11**(3):261-67
90. Stanbridge RI, Burbach FR, Lucas AS, et al. A study of families' satisfaction with a family interventions in psychosis service in Somerset. *Journal of Family Therapy* 2003;**25**(2):181-204 doi: 10.1111/1467-6427.00243[published Online First: Epub Date]].
91. Hudson BL. Behavioural social work with schizophrenic patients in the community. *British Journal of Social Work* 1978;**8**(2):159-70
92. Murphy N, Withnell N. Assessing the impact of delivering family interventions training modules: findings of a small-scale study. *Mental Health Nursing* 2013;**33**(5)
93. Hughes I, Hailwood R, Abbati-Yeoman J, et al. Developing a family intervention service for serious mental illness: clinical observations and experiences. *Journal of Mental Health* 1996;**5**(2):145-60
94. Building family skills together: An implementation strategy for evidence-based family interventions in public mental health services; 2008. Sydney: The MHS Conference Inc.
95. Piippo J, Aaltonen J. Mental health and creating safety: the participation of relatives in psychiatric treatment and its significance. *Journal of Clinical Nursing* 2009;**18**(14):2003-12
96. Seikkula J, Alakare B, Aaltonen J. Open dialogue in psychosis II: A comparison of good and poor outcome cases. *Journal of Constructivist Psychology* 2001;**14**(4):267-84 doi: 10.1080/107205301750433405[published Online First: Epub Date]].

- 1  
2  
3  
4  
5  
6  
7  
8  
9  
10  
11  
12  
13  
14  
15  
16  
17  
18  
19  
20  
21  
22  
23  
24  
25  
26  
27  
28  
29  
30  
31  
32  
33  
34  
35  
36  
37  
38  
39  
40  
41  
42  
43  
44  
45
97. Forrest S, Masters H, Milne V. Evaluating the impact of training in psychosocial interventions: a stakeholder approach to evaluation—part II. *Journal of Psychiatric and Mental Health Nursing* 2004;**11**(2):202-12
  98. Seikkula J, Aaltonen J, Alakare B, et al. Five-year experience of first-episode nonaffective psychosis in open-dialogue approach: Treatment principles, follow-up outcomes, and two case studies. *Psychotherapy Research* 2006;**16**(2):214-28 doi: 10.1080/10503300500268490[published Online First: Epub Date]].
  99. Seikkula J, Alakare B, Aaltonen J. Open dialogue in psychosis I: An introduction and case illustration. *Journal of Constructivist Psychology* 2001;**14**(4):247-65 doi: 10.1080/107205301750433397[published Online First: Epub Date]].
  100. O'Neill M, Moore K, Ryan A. Exploring the role and perspectives of mental health nurse practitioners following psychosocial interventions training. *Journal of Psychiatric and Mental Health Nursing* 2008;**15**(7):582-87
  101. Budd RJ, Hughes IC. What do relatives of people with schizophrenia find helpful about family intervention? *Schizophrenia Bulletin* 1997;**23**(2):341
  102. Viljoen D, Boyd J. Service user views: Promoting a systemic therapy service in adult mental health. *Clinical Psychology Forum* 2005(152):13-16
  103. Piippo J, Aaltonen J. Mental health: integrated network and family-oriented model for co-operation between mental health patients, adult mental health services and social services. *Journal of Clinical Nursing* 2004;**13**(7):876-85
  104. Tompson MC, Rea MM, Goldstein MJ, et al. Difficulty in implementing a family intervention for bipolar disorder: the predictive role of patient and family attributes. *Family Process* 2000; (1).  
<http://onlinelibrary.wiley.com/doi/10.1111/j.1545-3011.2000.00557.x>
  105. Fixsen DL, Blase KA, Naoom SF, et al. Core implementation components. *Research on Social Work Practice* 2009;**19**(5):531-40
  106. Edmondson AC, Bohmer RM, Pisano GP. Disrupted routines: Team learning and new technology implementation in hospitals. *Administrative Science Quarterly* 2001;**46**(4):685-716
  107. Edmondson AC. Learning from failure in health care: frequent opportunities, pervasive barriers. *Quality and Safety in Health Care* 2004;**13**(suppl 2):ii3-ii9
  108. Aarons G. Transformational and transactional leadership: Association with attitudes toward evidence-based practice. *Psychiatric Services* 2006;**57**(8):1162-69
  109. Fadden G, Heelis R. The Meriden Family Programme: lessons learned over 10 years. *Journal of Mental Health* 2011;**20**(1):79-88
  110. Glisson C, James LR. The cross-level effects of culture and climate in human service teams. *Journal of Organizational Behavior* 2002;**23**(6):767-94
  111. Klein KJ, Sorra JS. The challenge of innovation implementation. *Academy of management review* 1996;**21**(4):1055-80
  112. Wynne LC. The rationale for consultation with the families of schizophrenic patients. *Acta Psychiatrica Scandinavica* 1994;**90**(s384):125-32
  113. Winefield HR. Barriers to an alliance between family and professional caregivers in chronic schizophrenia. *Journal of Mental Health* 1996;**5**(3):223-32

## 46 Figures & Table Legends

47  
48  
49 **Figure 1.** PRISMA flow diagram for paper selection

50  
51 **Figure 2.** Barriers, problems and **facilitating factors related to** family work. Summary of themes

52  
53 **Supplementary File 1.** Protocol for Systematic Review

54  
55 **Supplementary File 2.** Modified database search strategies

56  
57 **Supplementary File 3.** Characteristics of included studies (n=43)

Fig.1 PRISMA flow diagram for paper selection

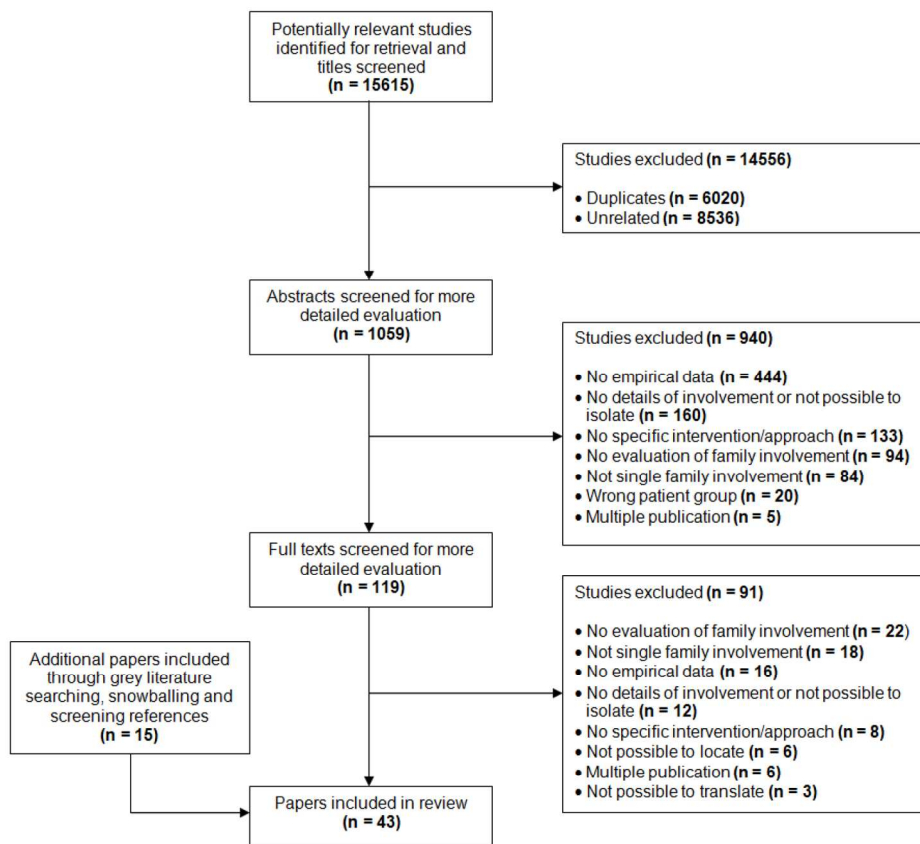PRISMA flow diagram for paper selection  
150x150mm (300 x 300 DPI)



Figure 2. Barriers, problems and facilitating factors related to family work. Summary of themes (Page 1 of 2).

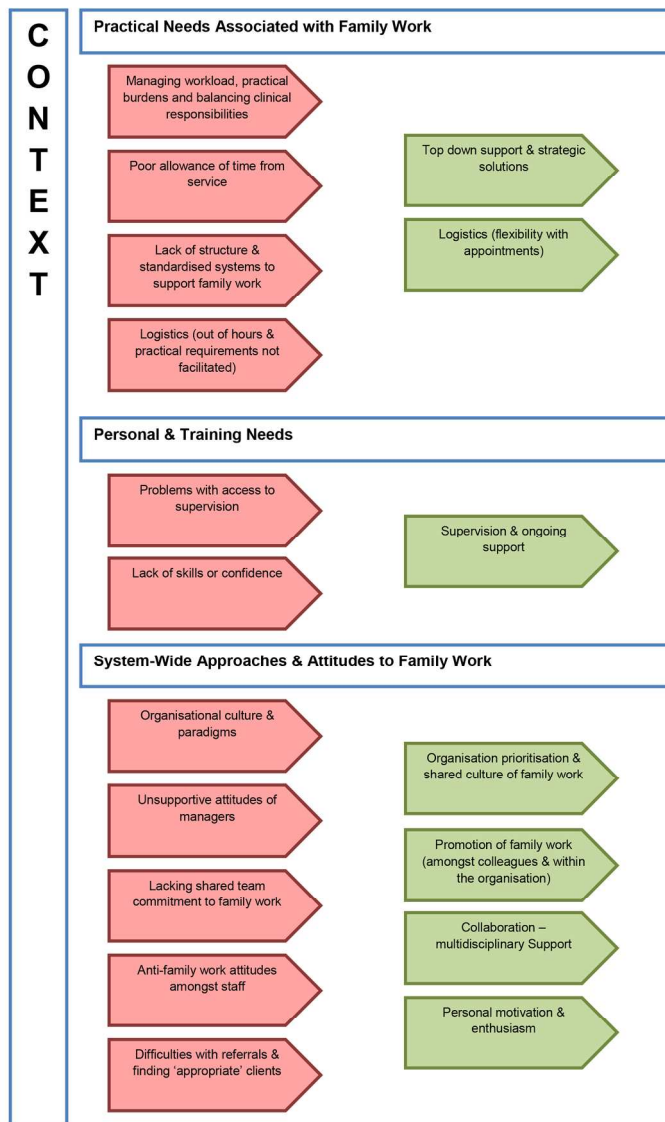

Barriers, problems and facilitating factors related to family work. Summary of themes (Page 1).  
172x233mm (300 x 300 DPI)

1  
2  
3  
4  
5  
6  
7  
8  
9  
10  
11  
12  
13  
14  
15  
16  
17  
18  
19  
20  
21  
22  
23  
24  
25  
26  
27  
28  
29  
30  
31  
32  
33  
34  
35  
36  
37  
38  
39  
40  
41  
42  
43  
44  
45  
46  
47  
48  
49  
50  
51  
52  
53  
54  
55  
56  
57  
58  
59  
60

Figure 2. Barriers, problems and facilitating factors related to family work. Summary of themes (Page 2 of 2).

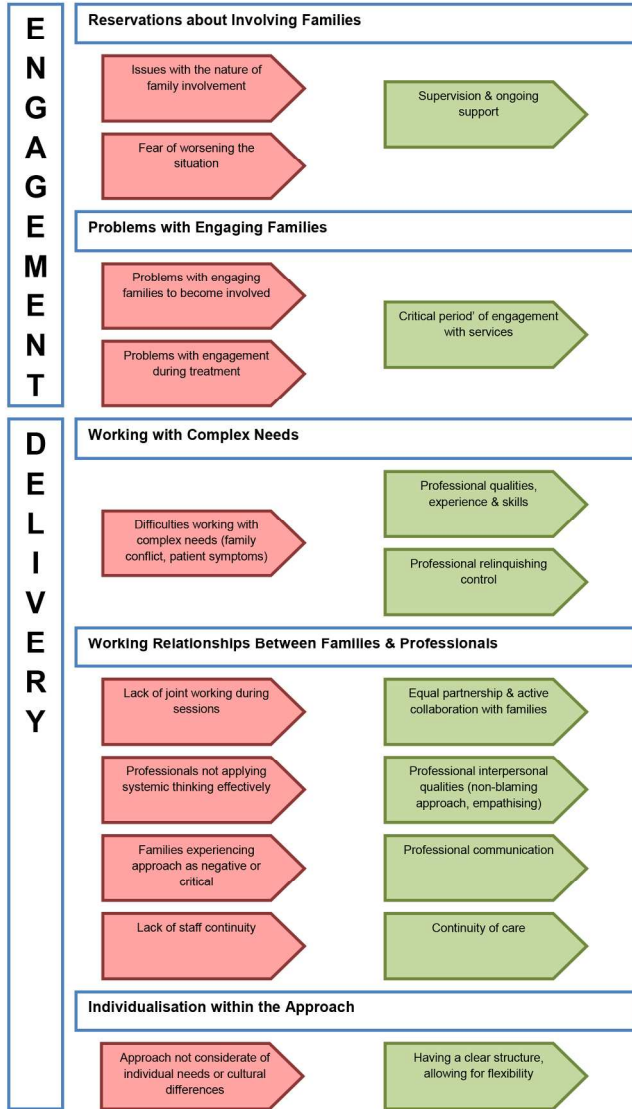

Barriers, problems and facilitating factors related to family work. Summary of themes (Page 2).  
165x233mm (300 x 300 DPI)



## Supplementary file: Protocol for a Systematic Review

### Implementing family involvement in treatment of psychosis: A Systematic Review of facilitating and hindering factors

Domenico Giacco, Erica Eassom & Stefan Priebe

#### **Background and rationale for a review**

Due to the move of psychiatric care from hospitals to community, nowadays informal caregivers (i.e. family or friends) have taken some functions performed in the past by psychiatric institutions. Consequently, "informal care" plays a significant role in development and evaluation of health programs and policies (Clark & Drake, 1994; Simpson, 2008; Caqueo-Urizar et al., 2009).

An estimated 40-50% of almost six million carers in the United Kingdom provide care for another family member or friend with a mental health problem (Office for National Statistics 2003). In particular, it has been estimated that carers of people with schizophrenia save the public purse £1.24 billion per year (Schizophrenia Commission Report, 2012).

Many psychiatric policies and guidelines stipulate that families should be supported and actively involved in psychiatric treatment (Department of Health, 2006; National Institute of Mental Health in England, 2004; NICE, 2011). The Schizophrenia Commission Report (2012) states that "Services need to make a fundamental reappraisal of how they treat families and put them at the centre of their thinking and practice". This document also emphasizes that "carers are seen as resource, experts, partners in care". Recent evidence from large scale European and UK studies has documented that relatives wish to be more involved in the care of their ill relatives, also during acute phases of their illness (Jankovic et al., 2011; Giacco et al., 2012).

Family involvement in treatment is often seen as intrinsically worthwhile; however some positive consequences in terms of patients' outcomes and patients and families' satisfaction with treatments have also been hypothesized (Simpson and House, 2003).

However, a number of barriers to family involvement in treatment and problems in its implementation in routine practice have been also identified (Simpson and House, 2003) such as: danger of increasing burden related to caregiving, role strain, lack of experience and/or interest. Also, specific problems may arise in different phases of the illness (e.g. when the patient is acutely ill and requires involuntary treatment).

This study will systematically review the available studies exploring family involvement in routine psychiatric treatment. Assessing barriers, problems and facilitating factors related to family involvement will help better define and implement family involvement in clinical practice.

#### **Research questions**

The review will aim at answering the following research questions:

1. What are the barriers that may prevent family involvement?

- 2.
  - 3.
  - 4.
  - 5.
  - 6.
  - 7.
  - 8.
  - 9.
  - 10.
  - 11.
  - 12.
  - 13.
  - 14.
  - 15.
  - 16.
  - 17.
  - 18.
  - 19.
  - 20.
  - 21.
  - 22.
  - 23.
  - 24.
  - 25.
  - 26.
  - 27.
  - 28.
  - 29.
  - 30.
  - 31.
  - 32.
  - 33.
  - 34.
  - 35.
  - 36.
  - 37.
  - 38.
  - 39.
  - 40.
  - 41.
  - 42.
  - 43.
  - 44.
  - 45.
  - 46.
  - 47.
  - 48.
  - 49.
  - 50.
  - 51.
  - 52.
  - 53.
  - 54.
  - 55.
  - 56.
  - 57.
  - 58.
  - 59.
  - 60.
2. What are the problems that may arise during implementation of family involvement?
  3. What are the facilitating factors for family involvement?

The different perspectives of patients, their family members and staff will be assessed.

### **Selection criteria**

#### 1) Study type

Conducted in general public mental health services  
Any type of study design (qualitative, quantitative and mixed)  
Published in Latin script

#### 2) Participants

##### Patients

People with psychotic disorders (F20-29 and F31 according to ICD-10)  
Age 18-65/ any gender/nationality

##### Family/Carers

Family and informal (i.e. non-professional) carers: relatives, friends, others  
Any age /gender/nationality  
Either main carer (i.e. spending most time with the patient) or other carers

##### Staff

Any mental health professional (psychiatrists, psychologists, nurses, social workers, care coordinators, occupational therapists)

#### 3) Family involvement

Explicit description of family involvement (i.e. information, support, involvement in decision making, preparation of crisis plans, etc.)  
Assessment of carer's involvement through assessment of barriers or problems or facilitating factors or feasibility

### **Exclusion criteria**

- 1) Studies assessing family involvement in planning of services will be excluded
- 2) Studies not reporting clear information on how family involvement was implemented (services' catchment area, description of activities, i.e. information, support, involvement in decision making, preparation of crisis plans, etc.)
- 3) Studies into general experience, opinions, satisfaction or needs, unless related to a clearly described carer involvement in treatment
- 4) Studies reporting on therapy for the family or group psychoeducation, i.e. the carer involvement will have to be in the context of the treatment of an individual patient

## Methods

In order to gather relevant literature, electronic searches of electronic databases will take place. In addition, the articles included as references in the review papers found will be hand searched too.

Databases to be searched include:

- BNI
- CINAL
- EMBASE
- MEDLINE
- PsychINFO
- CENTRAL
- AMED
- Social Sciences Citations in Web of Knowledge

Hand searching of review articles on the topic and of included studies

Grey literature will also be searched, including:

- Dissertations/PhDs
- Contacting authors in the field
- Forward and backward snowballing related to citations

The abstracts of the papers identified will be examined to determine papers potentially relevant to the review. Based on this initial screening, selected full-text articles will be obtained for a second-stage screening. Studies will be included and submitted for data extraction if they specifically address family involvement in the treatment of patients with psychosis and if the tasks in which the family is involved are specifically described.

### Extraction process

Search terms will be a mixture of family/carers' involvement descriptors, psychosis descriptors and outcomes.

| Family/Carers' involvement descriptors | Psychosis descriptors     | Outcome descriptors         |              |
|----------------------------------------|---------------------------|-----------------------------|--------------|
| Carers                                 | Psychosis                 | Clinical outcomes           | Experiences  |
| Caregivers                             | Schizophrenia             | Symptoms                    | Benefits     |
| Relatives                              | Psychotic disorders       | Hospitalizations            | Rewards      |
| Friends                                | Schizoaffective disorder  | Quality of life             | Failures     |
| Family support                         | Schizophreniform disorder | Adherence                   | Challenges   |
| Family burden                          | Severe mental illness     | Satisfaction with treatment | Difficulties |
| Involvement                            | Acute phase               | Care                        | Barriers     |
| Social support                         | Crisis                    | Satisfaction                | Stress       |
| Practical support                      |                           | Experiences                 | Empowerment  |
| Inpatient treatment                    |                           | Service provision           |              |
| Outpatient treatment                   |                           | Psychiatric services        |              |
| Involuntary hospitalization            |                           | Opinions                    |              |
| Psychoeducation                        |                           | Attitude                    |              |

## References

1. Clark RE, Drake RE. Expenditures of time and money by families of people with severe mental illness and substance use disorders. *Community Ment Health Journal* 1994;30:145-63.
2. Simpson A. Working in partnership with families must form part of mental health nurse training. *Nursing Times* 2008;104:16.
3. Caqueo-Urizar A, Gutiérrez-Maldonado J, Miranda-Castillo C. Quality of life in caregivers of patients with schizophrenia: a literature review. *Health and Quality of Life Outcomes* 2009; 11;7:84
4. Office for National Statistics (2003) Census 2001. National report for England and Wales. London: The Stationery Office.
5. Schizophrenia Commission (Rethink). The abandoned illness: a report from Schizophrenia Commission. Available at: [www.rethink.org](http://www.rethink.org)
6. Jankovic J, Yeeles K, Katsakou C, Amos T, Morriss R, Rose D, Nichol P, McCabe R, Priebe S. Family caregivers' experiences of involuntary psychiatric hospital admissions of their relatives--a qualitative study. *PLoS One*. 2011;6:e25425.
7. Giacco D, Fiorillo A, Del Vecchio V, Kallert T, Onchev G, Raboch J, Mastrogianni A, Nawka A, Hadrys T, Kjellin L, Luciano M, De Rosa C, Maj M, Priebe S. Caregivers' appraisals of patients' involuntary hospital treatment: European multicentre study. *British Journal of Psychiatry*. 2012;201:486-91.
8. Department of Health. From values to action: The Chief Nursing Officer.s review of mental health nursing. London, Department of Health, 2006.
9. National Institute of Mental Health in England. Guiding Statement on Recovery. London, NIMHE, 2005. <http://www.psychminded.co.uk/news/news2005/feb05/nimherecovstatement.pdf>
10. National Institute for Clinical Excellence. Schizophrenia - Core interventions in the treatment and management of schizophrenia in adults in primary and secondary care. NICE, 2011.
11. Simpson EL, House A.O. User and carer involvement in mental health services: from rhetoric to science. *British Journal of Psychiatry* 2003, 183:89-91.

## Supplementary File. Modified database search strategies

**EMBASE/MEDLINE/PSYCHINFO/AMED via Ovid**

1. exp schizophrenia/ or exp psychosis/
2. 1 use emez
3. exp schizophrenia/ or exp psychotic disorders/
4. 3 use mesz
5. exp psychosis/ or schizoaffective disorder/
6. 5 use psyh
7. exp bipolar disorder/
8. (psychos#s or psychotic or schizo\$ or bipolar disorder).ti,ab.
9. ((chronic\$ or serious or severe\$) adj (mental\$ or psychological\$ or psychiatric) adj (disorder\$ or ill\$ or health or problem\$)).mp.
10. Or/2,4,6-9
11. ((famil\* adj2 therapy) or family psychiatry or family psychotherapy or family counselling or family work or family treatment or family intervention or family management or family approach\$).mp.  
[mp=ti, ab, sh, hw, tn, ot, dm, mf, dv, kw, nm, kf, ps, rs, ui, tc, id, tm]
12. ((carer or caregiver\$ or relative\$ or friend\$ or family or families) adj2 (partner\$ or work\$ with or support\$)).mp.
13. ((carer\$ or caregiver\$ or relative\$ or friend\$ or family or families) adj5 (program\$ or psychoeducation\$ or integrate\$ or train\$ or inform\$ or service\$ or intervention\$ or initiative\$ or psychosocial)).mp
14. ((carer\$ or caregiver\$ or relative\$ or friend\$ or family or families) adj (involv\$ or inclu\$)).mp.
15. or/11-14
16. (benefit\$ or advantage\$ or success\$ or fail\$ or problem\$ or disadvantage\$ or challenge\$ or barrier\$ or difficult\$ or issue\$ or experience\$ or satisf\$ or evaluat\$ or obstacle\$).ti,ab.
17. 10 and 15 and 16

**BNI/CINAHL via HILO**

1. (psychos?s OR psychotic OR schizoaff\* OR schizophr\* OR "bipolar disorder" OR "manic depression" OR "severe\* mental\* ill\*" OR "severe\* mental\* disorder\*" OR "serious\* mental\* ill\*" OR "serious\* mental\* disorder\*" OR "severe mental health" OR "serious mental health").ti,ab
2. ("family therapy" OR "family psychiatry" OR "family psychotherapy" OR "family counselling" OR "family work" OR "family treatment" OR "family intervention" OR "family management" OR "family approach\*").ti,ab,mw,su
3. ((carer\* OR caregiver\* OR relative\* OR friend\* OR family OR families) AND (partner\* OR "work\* with" OR support\* OR program\* OR psychoeducation\* OR integrate\* OR train\* OR inform\* OR service\* OR intervention\* OR initiative\* OR psychosocial OR involv\* OR inclu\*)).ti,ab

- 1
  - 2
  - 3
  - 4
  - 5
  - 6
  - 7
  - 8
  - 9
  - 10
  - 11
  - 12
  - 13
  - 14
  - 15
  - 16
  - 17
  - 18
  - 19
  - 20
  - 21
  - 22
  - 23
  - 24
  - 25
  - 26
  - 27
  - 28
  - 29
  - 30
  - 31
  - 32
  - 33
  - 34
  - 35
  - 36
  - 37
  - 38
  - 39
  - 40
  - 41
  - 42
  - 43
  - 44
  - 45
  - 46
  - 47
  - 48
  - 49
  - 50
  - 51
  - 52
  - 53
  - 54
  - 55
  - 56
  - 57
  - 58
  - 59
  - 60
4. 2 OR 3
  5. (benefit\* OR advantage\* OR success\* OR fail\* OR problem\* OR disadvantage\* OR challenge\* OR barrier\* OR difficult\* OR issue\* OR experience\* OR satisf\* OR evaluat\* OR obstacle\*).ti,ab
  6. 1 AND 4 AND 5

### Social Sciences Citations Index via Web of Knowledge

1. TS=(psychosis OR psychoses OR psychotic OR schizoaff\* OR schizophr\* OR "bipolar disorder" OR "manic depression" OR "severe\* mental\* ill\*" OR "severe\* mental\* disorder\*" OR "serious\* mental\* ill\*" OR "serious\* mental\* disorder\*" OR "severe mental health" OR "serious mental health")
2. TS=("family therapy" OR "family psychiatry" OR "family psychotherapy" OR "family counselling" OR "family work" OR "family treatment" OR "family intervention" OR "family management" OR "family approach\*")
3. TS=((carer\* OR caregiver\* OR relative\* OR friend\* OR family OR families) AND (partner\* OR "work\* with" OR support\* OR program\* OR psychoeducation\* OR integrate\* OR train\* OR inform\* OR service\* OR intervention\* OR initiative\* OR psychosocial OR involv\* OR inclu\*))
4. #2 OR #3
5. TS=(benefit\* OR advantage\* OR success\* OR fail\* OR problem\* OR disadvantage\* OR challenge\* OR barrier\* OR difficult\* OR issue\* OR experience\* OR satisf\* OR evaluat\* OR obstacle\*)
6. #1 AND #4 AND #5

Refined by: [excluding] Research Areas NEUROSCIENCES NEUROLOGY OR PHARMACOLOGY PHARMACY OR GENERAL INTERNAL MEDICINE OR PEDIATRICS OR GERIATRICS

### CDSR/DARE/CENTRAL via the Cochrane Library

1. . MeSH descriptor: [Schizophrenia] explode all trees
2. MeSH descriptor: [Psychotic Disorders] explode all trees
3. MeSH descriptor: [Bipolar Disorder] explode all trees
4. MeSH descriptor: [Affective Disorders, Psychotic] this term only
5. (chronic or serious or severe) next (mental or psychological or psychiatric) next (health or disorder or ill or problem) (Word variations have been searched)
6. Psychosis (Word variations have been searched)
7. {or #1-#6}



- 1
  - 2
  - 3
  - 4
  - 5
  - 6
  - 7
  - 8
  - 9
  - 10
  - 11
  - 12
  - 13
  - 14
  - 15
  - 16
  - 17
  - 18
  - 19
  - 20
  - 21
  - 22
  - 23
  - 24
  - 25
  - 26
  - 27
  - 28
  - 29
  - 30
  - 31
  - 32
  - 33
  - 34
  - 35
  - 36
  - 37
  - 38
  - 39
  - 40
  - 41
  - 42
  - 43
  - 44
  - 45
  - 46
  - 47
  - 48
  - 49
  - 50
  - 51
  - 52
  - 53
  - 54
  - 55
  - 56
  - 57
  - 58
  - 59
  - 60
8. (family next therapy) or (family next psychiatry) or (family next psychotherapy) or (family next counselling) or "family work" or (family next treatment) or (family next intervention) or "family management" or "family approach\*" (Word variations have been searched)
9. (carer OR caregiver OR relative OR friend OR family) NEAR (partner OR "work\* with" OR support OR program OR psychoeducation OR integrate OR train OR inform OR service OR intervention OR initiative OR psychosocial OR involve OR include) (Word variations have been searched)
10. benefit or advantage or success or fail or problem or disadvantage or challenge or barrier or difficult or issue or experience or satisf\* or evaluate or obstacle)
11. #8 or #9
12. #7 and #10 and #11 in Cochrane Reviews (Reviews and Protocols), Other Reviews and Trials

Supplementary File 3: Table of Characteristics of included studies (n=43)

| Country of origin, language, year of publication | Published Form  | Principal objective of the study                                                                                                                                                                                                                                  | Operationalisation of family involvement                                                                                                                                                                                                                                                       | Type of psychiatric service                           | Study design eliciting barriers and facilitating factors | Participants data used in review                                                                                                                                      | Methods relevant to review                                                |
|--------------------------------------------------|-----------------|-------------------------------------------------------------------------------------------------------------------------------------------------------------------------------------------------------------------------------------------------------------------|------------------------------------------------------------------------------------------------------------------------------------------------------------------------------------------------------------------------------------------------------------------------------------------------|-------------------------------------------------------|----------------------------------------------------------|-----------------------------------------------------------------------------------------------------------------------------------------------------------------------|---------------------------------------------------------------------------|
| UK (England), English, 2013 [75]                 | Journal Article | To explore the meaning and significance of FI for the individual who experiences psychosis, and its significance for recovery.                                                                                                                                    | <b>Family Intervention.</b> 'Integrated Family Intervention'; 'S.T.E.P. Service' individual and family CBT with systemic perspective: psychoeducation, needs assessment for further FI: problem solving, behavioural goal setting, medication management, relapse management, skills training. | Specialised (Family Intervention Service), Outpatient | Cross-sectional, Qualitative                             | 7 individuals with experience of psychosis and the FI service: diagnoses included schizophrenia, bipolar disorder, and severe depression.                             | Semi-structured interviews                                                |
| New Zealand, English, 1997 [76]                  | Journal Article | To measure the implementation of the 'Integrated Mental Health Care' approach 1 year after training and explore barriers and benefits; to provide information about participants' perceptions and experiences.                                                    | <b>Family Intervention.</b> 'Integrated Mental Health Care' community-based approach influenced by the BFT model of Falloon and colleagues (F-BFT): needs assessment, psychoeducation, skills training.                                                                                        | General, Outpatient                                   | Cross-sectional, Mixed Methods                           | 11 CPNs, 7 community workers, 5 OTs, 3 SWs, 2 managers, 1 psychiatrist, 1 psychiatric registrar, 1 activity centre coordinator, 1 liaison officer, 1 CP, 1 therapist. | a) Questionnaire (rating scale)<br>b) Semi-structured interviews          |
| UK (England), English, 2000 [77]                 | Book Chapter    | To investigate how FI had been integrated into former 'Thorn Course' trainees' routine work, examine the nature of any difficulties and determine if it is possible to predict which trainees would be more able to implement FI skills acquired during training. | <b>Family Intervention.</b> 'Psychosocial Family Interventions for psychosis': formulation driven, cognitive behavioural family approach: needs assessment, education, skills training.                                                                                                        | General, Inpatient & Outpatient                       | Cross-sectional, Mixed Methods                           | 16 community-based MHNs, 2 ward-based MHNs, 2 managers, 1 lecturer.                                                                                                   | Questionnaire (rating scale & open ended responses)                       |
| UK (England), English, 2003 [78]                 | Journal Article | To examine the effectiveness of the 'FIRST' FI training programme and compare experiences of staff in Somerset with staff in previous studies.                                                                                                                    | <b>Family Intervention.</b> 'Psychosocial Family Interventions for psychosis' based on the 'S.T.E.P. Service' model: individual and family CBT with systemic perspective: needs assessment, education, skills training.                                                                        | General, Inpatient & Outpatient                       | Cross-sectional, Mixed Methods                           | 8 CPNs, 5 MHNs, 2 SWs, 1 psychiatrist, 1 CP, 1 art therapist.                                                                                                         | a) Questionnaire (rating scale & open ended responses)<br>b) Focus groups |
| India, English, 2012 [88]                        | Journal Article | To report on the researching, planning and delivery of a pilot of a community-based intervention for people with schizophrenia and their carers, delivered by lay health workers.                                                                                 | <b>Family Intervention.</b> Community-based intervention for people with schizophrenia and their families: weekly home based sessions, needs assessment, psycho-education, adherence management, rehabilitation, health promotion.                                                             | General, Outpatient                                   | Case Study                                               | N/A                                                                                                                                                                   | Descriptive account                                                       |
| UK (England), English,                           | Journal article | To examine the experiences of trainers on the 'Meriden - West Midlands Family Programme' programme, including                                                                                                                                                     | <b>Family Intervention.</b> 'Meriden Family Work Programme' based on F-BFT. 10 to 14 sessions: psychoeducation, relapse planning,                                                                                                                                                              | General, Not Reported                                 | Cross-sectional, Qualitative                             | 42 Behavioural Family Therapy trainers.                                                                                                                               | Structured written and phone questionnaires                               |

|    |                |                 |                                                                                                                                                                                                             |                                                                                                                                                                                                                                                                                    |                                            |                                |                                                                                                                                     |                                                                                       |
|----|----------------|-----------------|-------------------------------------------------------------------------------------------------------------------------------------------------------------------------------------------------------------|------------------------------------------------------------------------------------------------------------------------------------------------------------------------------------------------------------------------------------------------------------------------------------|--------------------------------------------|--------------------------------|-------------------------------------------------------------------------------------------------------------------------------------|---------------------------------------------------------------------------------------|
| 1  |                |                 |                                                                                                                                                                                                             |                                                                                                                                                                                                                                                                                    |                                            |                                |                                                                                                                                     |                                                                                       |
| 2  |                |                 |                                                                                                                                                                                                             |                                                                                                                                                                                                                                                                                    |                                            |                                |                                                                                                                                     |                                                                                       |
| 3  | 2001 [79]      |                 | motivations, frustrations, benefits and support from being involved in Meriden.                                                                                                                             | skills training.                                                                                                                                                                                                                                                                   |                                            |                                |                                                                                                                                     | (open-ended responses)                                                                |
| 4  |                |                 |                                                                                                                                                                                                             |                                                                                                                                                                                                                                                                                    |                                            |                                |                                                                                                                                     |                                                                                       |
| 5  | UK             | Journal Article | To establish the prevailing issues and working practices of qualified Mental Health Nurses carrying out FI.                                                                                                 | <b>Family Intervention.</b> 'Schizophrenia Family Work', based on F-BFT principles: psychoeducation, problem solving, skills training.                                                                                                                                             | General, Inpatient & Outpatient            | Cross-sectional, Mixed Methods | 36 CPNs, 2 ward-based MHNs.                                                                                                         | Questionnaire (rating & open-ended response)                                          |
| 6  | (England),     |                 |                                                                                                                                                                                                             |                                                                                                                                                                                                                                                                                    |                                            |                                |                                                                                                                                     |                                                                                       |
| 7  | English,       |                 |                                                                                                                                                                                                             |                                                                                                                                                                                                                                                                                    |                                            |                                |                                                                                                                                     |                                                                                       |
| 8  | 1997 [65]      |                 |                                                                                                                                                                                                             |                                                                                                                                                                                                                                                                                    |                                            |                                |                                                                                                                                     |                                                                                       |
| 9  | United States, | Journal Article | To discuss barriers to implementing FI in the treatment of psychotic-spectrum illnesses, in both inpatient and outpatient settings.                                                                         | <b>Family Intervention.</b> 'Family focused evidence based treatment': psychoeducation, problem solving, skills training.                                                                                                                                                          | General, Inpatient & Outpatient            | Case Study                     | N/A                                                                                                                                 | a) Descriptive account<br>b) Case study                                               |
| 10 | English,       |                 |                                                                                                                                                                                                             |                                                                                                                                                                                                                                                                                    |                                            |                                |                                                                                                                                     |                                                                                       |
| 11 | 2007 [62]      |                 |                                                                                                                                                                                                             |                                                                                                                                                                                                                                                                                    |                                            |                                |                                                                                                                                     |                                                                                       |
| 12 |                |                 |                                                                                                                                                                                                             |                                                                                                                                                                                                                                                                                    |                                            |                                |                                                                                                                                     |                                                                                       |
| 13 | UK             | Journal Article | To describe the effect on the role and function of the Community Psychiatric Nurse after training to deliver psychosocial intervention to families caring for a relative with schizophrenia living at home. | <b>Family Intervention.</b> 'Psychosocial Intervention', based on F- BFT: needs assessment, psychoeducation, skills training, problem-solving, medication compliance, crisis planning, cognitive behavioural management strategies.                                                | General, Outpatient                        | Cross-sectional, Mixed Methods | 18 CPNs.                                                                                                                            | Questionnaire (rating & open-ended response)                                          |
| 14 | (England),     |                 |                                                                                                                                                                                                             |                                                                                                                                                                                                                                                                                    |                                            |                                |                                                                                                                                     |                                                                                       |
| 15 | English,       |                 |                                                                                                                                                                                                             |                                                                                                                                                                                                                                                                                    |                                            |                                |                                                                                                                                     |                                                                                       |
| 16 | 1991 [66]      |                 |                                                                                                                                                                                                             |                                                                                                                                                                                                                                                                                    |                                            |                                |                                                                                                                                     |                                                                                       |
| 17 |                |                 |                                                                                                                                                                                                             |                                                                                                                                                                                                                                                                                    |                                            |                                |                                                                                                                                     |                                                                                       |
| 18 | UK (Wales),    | Journal Article | To investigate what carers found helpful and unhelpful about the community-based FI programme.                                                                                                              | <b>Family Intervention.</b> Based on the 'S.T.E.P. Service' model of individual and family CBT with systemic perspective: psychoeducation; needs assessment for further FI: problem solving, behavioural goal setting, medication management, relapse management, skills training. | General, Outpatient                        | Cross-sectional, Qualitative   | 20 relatives of people with a diagnosis of schizophrenia or schizoaffective disorder.                                               | Semi-structured interviews                                                            |
| 19 | English,       |                 |                                                                                                                                                                                                             |                                                                                                                                                                                                                                                                                    |                                            |                                |                                                                                                                                     |                                                                                       |
| 20 | 1997 [101]     |                 |                                                                                                                                                                                                             |                                                                                                                                                                                                                                                                                    |                                            |                                |                                                                                                                                     |                                                                                       |
| 21 |                |                 |                                                                                                                                                                                                             |                                                                                                                                                                                                                                                                                    |                                            |                                |                                                                                                                                     |                                                                                       |
| 22 |                |                 |                                                                                                                                                                                                             |                                                                                                                                                                                                                                                                                    |                                            |                                |                                                                                                                                     |                                                                                       |
| 23 | Ireland,       | Journal Article | To investigate participants' use of PSI in clinical practice following postgraduate training.                                                                                                               | <b>Family Intervention.</b> 'Psychosocial Intervention', based on F-BFT: needs assessment, psychoeducation, skills training, problem-solving, medication compliance, crisis planning, cognitive behavioural management strategies.                                                 | General, Inpatient & Outpatient            | Cross-sectional, Qualitative   | 8 MHNs.                                                                                                                             | Questionnaire (open-ended response)                                                   |
| 24 | English,       |                 |                                                                                                                                                                                                             |                                                                                                                                                                                                                                                                                    |                                            |                                |                                                                                                                                     |                                                                                       |
| 25 | 2014 [68]      |                 |                                                                                                                                                                                                             |                                                                                                                                                                                                                                                                                    |                                            |                                |                                                                                                                                     |                                                                                       |
| 26 |                |                 |                                                                                                                                                                                                             |                                                                                                                                                                                                                                                                                    |                                            |                                |                                                                                                                                     |                                                                                       |
| 27 | UK             | Journal Article | To describe the lived experiences of families who had received the family intervention of BFT.                                                                                                              | <b>Family Intervention.</b> 'Meriden Family Work Programme' based on F-BFT: psychoeducation, skills training, relapse management, problem solving.                                                                                                                                 | General, Outpatient                        | Cross-sectional, Qualitative   | 9 service users with a diagnosis of severe mental illness (schizophrenia, bipolar disorder, severe depression), 18 family members.  | Semi-structured family interviews                                                     |
| 28 | (England),     |                 |                                                                                                                                                                                                             |                                                                                                                                                                                                                                                                                    |                                            |                                |                                                                                                                                     |                                                                                       |
| 29 | English,       |                 |                                                                                                                                                                                                             |                                                                                                                                                                                                                                                                                    |                                            |                                |                                                                                                                                     |                                                                                       |
| 30 | 2004 [89]      |                 |                                                                                                                                                                                                             |                                                                                                                                                                                                                                                                                    |                                            |                                |                                                                                                                                     |                                                                                       |
| 31 |                |                 |                                                                                                                                                                                                             |                                                                                                                                                                                                                                                                                    |                                            |                                |                                                                                                                                     |                                                                                       |
| 32 | United States, | Journal Article | To study the implementation of an FI in order to perform a process analysis of implementation and examine utilisation of the intervention.                                                                  | <b>Family Intervention.</b> 'Psychoeducation & EQUIP (Enhancing Quality of Care in Psychosis)': family outreach, needs assessment and care coordination, medication management, and optional further family intervention.                                                          | Specialised (Veterans Affairs), Outpatient | Cross-sectional, Mixed methods | 173 patients with a diagnosis of schizophrenia or schizoaffective disorder; 18 clinicians (psychiatrists and psychiatry residents). | a) Questionnaire (ratings and open-ended responses)<br>b) Semi-structured interviews. |
| 33 | English,       |                 |                                                                                                                                                                                                             |                                                                                                                                                                                                                                                                                    |                                            |                                |                                                                                                                                     |                                                                                       |
| 34 | 2010 [80]      |                 |                                                                                                                                                                                                             |                                                                                                                                                                                                                                                                                    |                                            |                                |                                                                                                                                     |                                                                                       |
| 35 |                |                 |                                                                                                                                                                                                             |                                                                                                                                                                                                                                                                                    |                                            |                                |                                                                                                                                     |                                                                                       |
| 36 | Spain,         | Journal Article | To describe the implementation process of a family psychoeducation programme                                                                                                                                | <b>Family Intervention.</b> Based on F-BFT: psychoeducation, problem solving, skills                                                                                                                                                                                               | General, Outpatient                        | Case Study                     | N/A                                                                                                                                 | Descriptive account                                                                   |
| 37 | Spanish,       |                 |                                                                                                                                                                                                             |                                                                                                                                                                                                                                                                                    |                                            |                                |                                                                                                                                     |                                                                                       |
| 38 |                |                 |                                                                                                                                                                                                             |                                                                                                                                                                                                                                                                                    |                                            |                                |                                                                                                                                     |                                                                                       |
| 39 |                |                 |                                                                                                                                                                                                             |                                                                                                                                                                                                                                                                                    |                                            |                                |                                                                                                                                     |                                                                                       |
| 40 |                |                 |                                                                                                                                                                                                             |                                                                                                                                                                                                                                                                                    |                                            |                                |                                                                                                                                     |                                                                                       |
| 41 |                |                 |                                                                                                                                                                                                             |                                                                                                                                                                                                                                                                                    |                                            |                                |                                                                                                                                     |                                                                                       |
| 42 |                |                 |                                                                                                                                                                                                             |                                                                                                                                                                                                                                                                                    |                                            |                                |                                                                                                                                     |                                                                                       |
| 43 |                |                 |                                                                                                                                                                                                             |                                                                                                                                                                                                                                                                                    |                                            |                                |                                                                                                                                     |                                                                                       |
| 44 |                |                 |                                                                                                                                                                                                             |                                                                                                                                                                                                                                                                                    |                                            |                                |                                                                                                                                     |                                                                                       |
| 45 |                |                 |                                                                                                                                                                                                             |                                                                                                                                                                                                                                                                                    |                                            |                                |                                                                                                                                     |                                                                                       |
| 46 |                |                 |                                                                                                                                                                                                             |                                                                                                                                                                                                                                                                                    |                                            |                                |                                                                                                                                     |                                                                                       |
| 47 |                |                 |                                                                                                                                                                                                             |                                                                                                                                                                                                                                                                                    |                                            |                                |                                                                                                                                     |                                                                                       |
| 48 |                |                 |                                                                                                                                                                                                             |                                                                                                                                                                                                                                                                                    |                                            |                                |                                                                                                                                     |                                                                                       |
| 49 |                |                 |                                                                                                                                                                                                             |                                                                                                                                                                                                                                                                                    |                                            |                                |                                                                                                                                     |                                                                                       |

|    |                                   |                  |                                                                                                                                                                                                                                                                 |                                                                                                                                                                                                                                              |                                 |                                |                                                                             |                                                                                              |
|----|-----------------------------------|------------------|-----------------------------------------------------------------------------------------------------------------------------------------------------------------------------------------------------------------------------------------------------------------|----------------------------------------------------------------------------------------------------------------------------------------------------------------------------------------------------------------------------------------------|---------------------------------|--------------------------------|-----------------------------------------------------------------------------|----------------------------------------------------------------------------------------------|
| 1  |                                   |                  |                                                                                                                                                                                                                                                                 |                                                                                                                                                                                                                                              |                                 |                                |                                                                             |                                                                                              |
| 2  |                                   |                  |                                                                                                                                                                                                                                                                 |                                                                                                                                                                                                                                              |                                 |                                |                                                                             |                                                                                              |
| 3  | 2011 [81]                         |                  | in nine mental health services in Spain.                                                                                                                                                                                                                        | training, relapse management.                                                                                                                                                                                                                |                                 |                                |                                                                             |                                                                                              |
| 4  |                                   |                  |                                                                                                                                                                                                                                                                 |                                                                                                                                                                                                                                              |                                 |                                |                                                                             |                                                                                              |
| 5  | Italy, Italian, 2011 [67]         | Journal Article  | To identify benefits and barriers in implementing a family psychoeducation programme, according to professionals' perspectives and participation of families to the programme.                                                                                  | <b>Family Intervention.</b> Based on F-BFT: psychoeducation, problem solving, skills training, relapse management.                                                                                                                           | General, Outpatient             | Cross-sectional, Mixed methods | 10 psychiatrists, 5 CPs, 6 MHNs and 1 rehabilitation therapist.             | a) Descriptive reports of attrition<br>b) Questionnaire (ratings and open-ended responses).  |
| 6  |                                   |                  |                                                                                                                                                                                                                                                                 |                                                                                                                                                                                                                                              |                                 |                                |                                                                             |                                                                                              |
| 7  |                                   |                  |                                                                                                                                                                                                                                                                 |                                                                                                                                                                                                                                              |                                 |                                |                                                                             |                                                                                              |
| 8  |                                   |                  |                                                                                                                                                                                                                                                                 |                                                                                                                                                                                                                                              |                                 |                                |                                                                             |                                                                                              |
| 9  |                                   |                  |                                                                                                                                                                                                                                                                 |                                                                                                                                                                                                                                              |                                 |                                |                                                                             |                                                                                              |
| 10 | UK (England), English, 2009 [63]  | Book Chapter     | To provide an organisational case analysis of implementing a new family service programme in one UK Trust.                                                                                                                                                      | <b>Family Intervention.</b> 'Meriden Family Work Programme' based on F-BFT: psychoeducation, skills training, relapse management, problem solving.                                                                                           | General, Inpatient & Outpatient | Case Study                     | N/A                                                                         | Descriptive account                                                                          |
| 11 |                                   |                  |                                                                                                                                                                                                                                                                 |                                                                                                                                                                                                                                              |                                 |                                |                                                                             |                                                                                              |
| 12 |                                   |                  |                                                                                                                                                                                                                                                                 |                                                                                                                                                                                                                                              |                                 |                                |                                                                             |                                                                                              |
| 13 |                                   |                  |                                                                                                                                                                                                                                                                 |                                                                                                                                                                                                                                              |                                 |                                |                                                                             |                                                                                              |
| 14 | UK (England), English, 2002 [64]  | Book Chapter     | To describe a strategic approach to the implementation of evidence-based approaches to family interventions in the UK West Midlands area.                                                                                                                       | <b>Family Intervention.</b> Based on the 'Meriden Family Work Programme' used by Fadden and colleagues: psychoeducation, skills training, relapse management, problem solving.                                                               | General, Inpatient & Outpatient | Case Study                     | N/A                                                                         | Descriptive account                                                                          |
| 15 |                                   |                  |                                                                                                                                                                                                                                                                 |                                                                                                                                                                                                                                              |                                 |                                |                                                                             |                                                                                              |
| 16 |                                   |                  |                                                                                                                                                                                                                                                                 |                                                                                                                                                                                                                                              |                                 |                                |                                                                             |                                                                                              |
| 17 |                                   |                  |                                                                                                                                                                                                                                                                 |                                                                                                                                                                                                                                              |                                 |                                |                                                                             |                                                                                              |
| 18 | UK (England), English, 1997 [82]  | Journal Article  | To ascertain the extent to which therapists trained in BFT have used the skills in their day-to-day work, to examine what difficulties they had encountered and to define outcomes and factors related to success.                                              | <b>Family Intervention.</b> Based on Fadden's 'Meriden Family Work Programme': psychoeducation, skills training, relapse management, problem solving.                                                                                        | General, Inpatient & Outpatient | Cross-sectional, Mixed methods | 35 CPNs, 20 MHNs, 9 psychiatrists, 8 OTs, 7 SWs, 7 rehabilitation officers. | a) Questionnaire (Rating and open-ended responses)<br>b) Between group comparison of ratings |
| 19 |                                   |                  |                                                                                                                                                                                                                                                                 |                                                                                                                                                                                                                                              |                                 |                                |                                                                             |                                                                                              |
| 20 |                                   |                  |                                                                                                                                                                                                                                                                 |                                                                                                                                                                                                                                              |                                 |                                |                                                                             |                                                                                              |
| 21 |                                   |                  |                                                                                                                                                                                                                                                                 |                                                                                                                                                                                                                                              |                                 |                                |                                                                             |                                                                                              |
| 22 |                                   |                  |                                                                                                                                                                                                                                                                 |                                                                                                                                                                                                                                              |                                 |                                |                                                                             |                                                                                              |
| 23 |                                   |                  |                                                                                                                                                                                                                                                                 |                                                                                                                                                                                                                                              |                                 |                                |                                                                             |                                                                                              |
| 24 | UK (Scotland), English, 2004 [97] | Journal Article  | To compare and contrast different elements of PSI courses and how they may impede/facilitate implementation, understand organisational catalysts/barriers and chart the relationship between organisation, educational and care arrangements on the use of PSI. | <b>Family Intervention.</b> 'Psychosocial Intervention', developed from F-BFT: assessment of relatives, psychoeducation, skills training, problem-solving, crisis management, cognitive-behavioural management strategies.                   | General, Outpatient             | Cross-sectional, Qualitative   | 3 service managers, 7 lecturers, 16 mental health workers.                  | Semi-structured interviews                                                                   |
| 25 |                                   |                  |                                                                                                                                                                                                                                                                 |                                                                                                                                                                                                                                              |                                 |                                |                                                                             |                                                                                              |
| 26 |                                   |                  |                                                                                                                                                                                                                                                                 |                                                                                                                                                                                                                                              |                                 |                                |                                                                             |                                                                                              |
| 27 |                                   |                  |                                                                                                                                                                                                                                                                 |                                                                                                                                                                                                                                              |                                 |                                |                                                                             |                                                                                              |
| 28 |                                   |                  |                                                                                                                                                                                                                                                                 |                                                                                                                                                                                                                                              |                                 |                                |                                                                             |                                                                                              |
| 29 |                                   |                  |                                                                                                                                                                                                                                                                 |                                                                                                                                                                                                                                              |                                 |                                |                                                                             |                                                                                              |
| 30 |                                   |                  |                                                                                                                                                                                                                                                                 |                                                                                                                                                                                                                                              |                                 |                                |                                                                             |                                                                                              |
| 31 | Canada, English, 2006 [69]        | Journal Article  | To compare family nursing interventions of nurses before and after an educational programme based on the Calgary Family Assessment Model and Calgary Family Intervention Model and to explore perceptions of the programme.                                     | <b>Systemic Psychotherapy.</b> 'Family systems nursing approach': Targeting interactions between members of the family and between the family and practitioner.                                                                              | General, Inpatient              | Cross-sectional, Qualitative   | 7 MHNs.                                                                     | a) Content analysis of logbooks<br>b) Semi-structured interviews                             |
| 32 |                                   |                  |                                                                                                                                                                                                                                                                 |                                                                                                                                                                                                                                              |                                 |                                |                                                                             |                                                                                              |
| 33 |                                   |                  |                                                                                                                                                                                                                                                                 |                                                                                                                                                                                                                                              |                                 |                                |                                                                             |                                                                                              |
| 34 |                                   |                  |                                                                                                                                                                                                                                                                 |                                                                                                                                                                                                                                              |                                 |                                |                                                                             |                                                                                              |
| 35 | Australia, English, 2008 [94]     | Conference Paper | To evaluate service implementation of the 'Building Family Skills Together Programme'.                                                                                                                                                                          | <b>Family Intervention.</b> Based on Fadden's 'Meriden Family Work Programme': psychoeducation, skills training, relapse management, problem solving. 'Family Sensitive Practice' and a Family Practice Consultant embedded in each service. | General, Outpatient             | Case Study                     | N/A                                                                         | Descriptive account                                                                          |
| 36 |                                   |                  |                                                                                                                                                                                                                                                                 |                                                                                                                                                                                                                                              |                                 |                                |                                                                             |                                                                                              |
| 37 |                                   |                  |                                                                                                                                                                                                                                                                 |                                                                                                                                                                                                                                              |                                 |                                |                                                                             |                                                                                              |
| 38 |                                   |                  |                                                                                                                                                                                                                                                                 |                                                                                                                                                                                                                                              |                                 |                                |                                                                             |                                                                                              |
| 39 |                                   |                  |                                                                                                                                                                                                                                                                 |                                                                                                                                                                                                                                              |                                 |                                |                                                                             |                                                                                              |
| 40 | Germany, English, 2013 [73]       | Journal Article  | To assess the feasibility of continuous implementation of SYMPA (systems therapy methods in acute psychiatry)                                                                                                                                                   | <b>Systemic Psychotherapy.</b> A systemic resource-oriented and solution-oriented psychotherapeutic treatment.                                                                                                                               | General, Inpatient              | Cross-sectional, Qualitative   | Staff trained in the SYMPA method: survey 51, interviews 56 (overlap in     | a) Questionnaire (rating and open-ended responses)                                           |
| 41 |                                   |                  |                                                                                                                                                                                                                                                                 |                                                                                                                                                                                                                                              |                                 |                                |                                                                             |                                                                                              |
| 42 |                                   |                  |                                                                                                                                                                                                                                                                 |                                                                                                                                                                                                                                              |                                 |                                |                                                                             |                                                                                              |
| 43 |                                   |                  |                                                                                                                                                                                                                                                                 |                                                                                                                                                                                                                                              |                                 |                                |                                                                             |                                                                                              |
| 44 |                                   |                  |                                                                                                                                                                                                                                                                 |                                                                                                                                                                                                                                              |                                 |                                |                                                                             |                                                                                              |
| 45 |                                   |                  |                                                                                                                                                                                                                                                                 |                                                                                                                                                                                                                                              |                                 |                                |                                                                             |                                                                                              |
| 46 |                                   |                  |                                                                                                                                                                                                                                                                 |                                                                                                                                                                                                                                              |                                 |                                |                                                                             |                                                                                              |
| 47 |                                   |                  |                                                                                                                                                                                                                                                                 |                                                                                                                                                                                                                                              |                                 |                                |                                                                             |                                                                                              |
| 48 |                                   |                  |                                                                                                                                                                                                                                                                 |                                                                                                                                                                                                                                              |                                 |                                |                                                                             |                                                                                              |
| 49 |                                   |                  |                                                                                                                                                                                                                                                                 |                                                                                                                                                                                                                                              |                                 |                                |                                                                             |                                                                                              |

|    |                                                                                 |                 |                                                                                                                                                                                              |                                                                                                                                                                                                                                                                              |                                                       |                                          |                                                                                                                             |                                                                                                |
|----|---------------------------------------------------------------------------------|-----------------|----------------------------------------------------------------------------------------------------------------------------------------------------------------------------------------------|------------------------------------------------------------------------------------------------------------------------------------------------------------------------------------------------------------------------------------------------------------------------------|-------------------------------------------------------|------------------------------------------|-----------------------------------------------------------------------------------------------------------------------------|------------------------------------------------------------------------------------------------|
| 1  |                                                                                 |                 |                                                                                                                                                                                              |                                                                                                                                                                                                                                                                              |                                                       |                                          |                                                                                                                             |                                                                                                |
| 2  |                                                                                 |                 |                                                                                                                                                                                              |                                                                                                                                                                                                                                                                              |                                                       |                                          |                                                                                                                             |                                                                                                |
| 3  |                                                                                 |                 | related methods.                                                                                                                                                                             |                                                                                                                                                                                                                                                                              |                                                       |                                          | participants).                                                                                                              | b) Semi-structured interviews                                                                  |
| 4  |                                                                                 |                 |                                                                                                                                                                                              |                                                                                                                                                                                                                                                                              |                                                       |                                          |                                                                                                                             | Descriptive account                                                                            |
| 5  | UK (England), English, 1978 [91]                                                | Journal Article | To identify problems associated with implementing a behavioural intervention.                                                                                                                | <b>Behavioural Therapy.</b> 'Behavioural Modification': Operant conditioning with the assistance of family members to reinforce "good" behaviours and discourage unhelpful ones, needs assessment, information and individualised practical support and advice for families. | General, Outpatient                                   | Case Study                               | N/A                                                                                                                         |                                                                                                |
| 6  |                                                                                 |                 |                                                                                                                                                                                              |                                                                                                                                                                                                                                                                              |                                                       |                                          |                                                                                                                             |                                                                                                |
| 7  |                                                                                 |                 |                                                                                                                                                                                              |                                                                                                                                                                                                                                                                              |                                                       |                                          |                                                                                                                             |                                                                                                |
| 8  |                                                                                 |                 |                                                                                                                                                                                              |                                                                                                                                                                                                                                                                              |                                                       |                                          |                                                                                                                             |                                                                                                |
| 9  |                                                                                 |                 |                                                                                                                                                                                              |                                                                                                                                                                                                                                                                              |                                                       |                                          |                                                                                                                             |                                                                                                |
| 10 | UK (Wales), English, 1996 [93]                                                  | Journal Article | To present an account of implementing FI within a routine clinical service rather than as part of a specially funded research project.                                                       | <b>Family Intervention.</b> Based on the 'S.T.E.P. Service' model: psychoeducation; needs assessment for further FI: problem solving, behavioural goal setting, medication management, relapse management, skills training.                                                  | Specialised (Family Intervention Service), Outpatient | Case Study & Audit report, Mixed methods | N/A                                                                                                                         | a) Descriptive account<br>b) Audit results                                                     |
| 11 |                                                                                 |                 |                                                                                                                                                                                              |                                                                                                                                                                                                                                                                              |                                                       |                                          |                                                                                                                             |                                                                                                |
| 12 |                                                                                 |                 |                                                                                                                                                                                              |                                                                                                                                                                                                                                                                              |                                                       |                                          |                                                                                                                             |                                                                                                |
| 13 |                                                                                 |                 |                                                                                                                                                                                              |                                                                                                                                                                                                                                                                              |                                                       |                                          |                                                                                                                             |                                                                                                |
| 14 |                                                                                 |                 |                                                                                                                                                                                              |                                                                                                                                                                                                                                                                              |                                                       |                                          |                                                                                                                             |                                                                                                |
| 15 | UK (England), English, 2006 [71]                                                | Journal Article | To establish what therapists and families believe to be helpful (or otherwise) in the engagement of families in Behavioural Family Therapy.                                                  | <b>Family Intervention.</b> F-BFT based model: needs assessment, psychoeducation, individual problem-solving approach, skills training.                                                                                                                                      | Generic, Inpatient & Outpatient                       | Cross-sectional, Qualitative             | 2 MHNs, 1 OT, 1 CP, 1 physiotherapist, 1 SW, 1 nurse manager; 7 relatives: 3 mothers, 2 fathers, 1 step-father, 1 daughter. | Semi-structured interviews                                                                     |
| 16 |                                                                                 |                 |                                                                                                                                                                                              |                                                                                                                                                                                                                                                                              |                                                       |                                          |                                                                                                                             |                                                                                                |
| 17 |                                                                                 |                 |                                                                                                                                                                                              |                                                                                                                                                                                                                                                                              |                                                       |                                          |                                                                                                                             |                                                                                                |
| 18 |                                                                                 |                 |                                                                                                                                                                                              |                                                                                                                                                                                                                                                                              |                                                       |                                          |                                                                                                                             |                                                                                                |
| 19 |                                                                                 |                 |                                                                                                                                                                                              |                                                                                                                                                                                                                                                                              |                                                       |                                          |                                                                                                                             |                                                                                                |
| 20 | Australia, English, 1993 [83]                                                   | Journal Article | To identify staff members' difficulties in applying the FI and to predict the systematic use of the intervention with families.                                                              | <b>Family Intervention.</b> 'Living with Schizophrenia' programme: needs assessment, interactive psychoeducation, relapse management, goal-setting, problem solving, cognitive-behavioural self-management.                                                                  | General Outpatient                                    | Cross-sectional, Quantitative            | 29 MHNs, 8 CPs, 2 OTs, 3 SWs, 2 psychiatric registrars and 1 psychiatrist.                                                  | a) Questionnaire (ratings and examination of intervention knowledge)<br>b) Regression analysis |
| 21 |                                                                                 |                 |                                                                                                                                                                                              |                                                                                                                                                                                                                                                                              |                                                       |                                          |                                                                                                                             |                                                                                                |
| 22 |                                                                                 |                 |                                                                                                                                                                                              |                                                                                                                                                                                                                                                                              |                                                       |                                          |                                                                                                                             |                                                                                                |
| 23 |                                                                                 |                 |                                                                                                                                                                                              |                                                                                                                                                                                                                                                                              |                                                       |                                          |                                                                                                                             |                                                                                                |
| 24 |                                                                                 |                 |                                                                                                                                                                                              |                                                                                                                                                                                                                                                                              |                                                       |                                          |                                                                                                                             |                                                                                                |
| 25 | UK (England), English, 2010 [72]                                                | Journal Article | To evaluate a cross-educational practice meeting in assisting 'Thorn Course' graduates to implement PSI into clinical practice.                                                              | <b>Family Intervention.</b> 'Psychosocial Intervention' Thorn model, developed from F-BFT: assessment of relatives, psychoeducation, skills training, problem-solving, crisis management, cognitive behavioural management strategies.                                       | General, Not Reported                                 | Cross-sectional, Qualitative             | 8 Thorn graduates, 4 line managers, 2 Thorn lecturer practitioners, 1 operational services director.                        | Semi-structured interviews                                                                     |
| 26 |                                                                                 |                 |                                                                                                                                                                                              |                                                                                                                                                                                                                                                                              |                                                       |                                          |                                                                                                                             |                                                                                                |
| 27 |                                                                                 |                 |                                                                                                                                                                                              |                                                                                                                                                                                                                                                                              |                                                       |                                          |                                                                                                                             |                                                                                                |
| 28 |                                                                                 |                 |                                                                                                                                                                                              |                                                                                                                                                                                                                                                                              |                                                       |                                          |                                                                                                                             |                                                                                                |
| 29 |                                                                                 |                 |                                                                                                                                                                                              |                                                                                                                                                                                                                                                                              |                                                       |                                          |                                                                                                                             |                                                                                                |
| 30 | International (Greece, Germany, Italy, Portugal, Spain, UK), English, 2005 [84] | Journal Article | To investigate the implementation and effectiveness of a standard psychoeducational family intervention in six European countries, exploring feasibility, difficulties, benefits and impact. | <b>Family Intervention.</b> Based on F-BFT: psychoeducation, problem solving, skills training, relapse management.                                                                                                                                                           | General, Inpatient & Outpatient                       | Cross-sectional, Mixed methods           | 15 psychiatrists, 14 MHNs, 7 CPs, 7 SWs, 1 OT, 4 other.                                                                     | Questionnaire (rating and open-ended responses)                                                |
| 31 |                                                                                 |                 |                                                                                                                                                                                              |                                                                                                                                                                                                                                                                              |                                                       |                                          |                                                                                                                             |                                                                                                |
| 32 |                                                                                 |                 |                                                                                                                                                                                              |                                                                                                                                                                                                                                                                              |                                                       |                                          |                                                                                                                             |                                                                                                |
| 33 |                                                                                 |                 |                                                                                                                                                                                              |                                                                                                                                                                                                                                                                              |                                                       |                                          |                                                                                                                             |                                                                                                |
| 34 |                                                                                 |                 |                                                                                                                                                                                              |                                                                                                                                                                                                                                                                              |                                                       |                                          |                                                                                                                             |                                                                                                |
| 35 |                                                                                 |                 |                                                                                                                                                                                              |                                                                                                                                                                                                                                                                              |                                                       |                                          |                                                                                                                             |                                                                                                |
| 36 | Italy, English, 2006 [85]                                                       | Journal Article | To investigate feasibility of providing psychoeducational interventions for persons with schizophrenia and their families.                                                                   | <b>Family Intervention.</b> Based on F-BFT: psychoeducation, problem solving, skills training, relapse management.                                                                                                                                                           | General, Outpatient                                   | Cross-sectional, Mixed methods           | 15 psychiatrists, 11 MHNs, 5 CPs, 4 rehabilitation therapists, 3 SWs.                                                       | Questionnaire (rating and open-ended responses)                                                |
| 37 |                                                                                 |                 |                                                                                                                                                                                              |                                                                                                                                                                                                                                                                              |                                                       |                                          |                                                                                                                             |                                                                                                |
| 38 |                                                                                 |                 |                                                                                                                                                                                              |                                                                                                                                                                                                                                                                              |                                                       |                                          |                                                                                                                             |                                                                                                |
| 39 |                                                                                 |                 |                                                                                                                                                                                              |                                                                                                                                                                                                                                                                              |                                                       |                                          |                                                                                                                             |                                                                                                |
| 40 | UK (England), English,                                                          | Journal Article | To describe the use of the theory-based implementation interview (TBI) to understand the difficulties in implementing                                                                        | <b>Family Intervention.</b> Psycho-education, problem solving, crisis planning, and individualised patient interventions.                                                                                                                                                    | General, Outpatient                                   | Cross-sectional, Qualitative             | 6 SWs, 5 MHNs, 4 team managers, 3 CPs, 2 psychiatrists.                                                                     | Semi-structured interviews                                                                     |
| 41 |                                                                                 |                 |                                                                                                                                                                                              |                                                                                                                                                                                                                                                                              |                                                       |                                          |                                                                                                                             |                                                                                                |
| 42 |                                                                                 |                 |                                                                                                                                                                                              |                                                                                                                                                                                                                                                                              |                                                       |                                          |                                                                                                                             |                                                                                                |
| 43 |                                                                                 |                 |                                                                                                                                                                                              |                                                                                                                                                                                                                                                                              |                                                       |                                          |                                                                                                                             |                                                                                                |
| 44 |                                                                                 |                 |                                                                                                                                                                                              |                                                                                                                                                                                                                                                                              |                                                       |                                          |                                                                                                                             |                                                                                                |
| 45 |                                                                                 |                 |                                                                                                                                                                                              |                                                                                                                                                                                                                                                                              |                                                       |                                          |                                                                                                                             |                                                                                                |
| 46 |                                                                                 |                 |                                                                                                                                                                                              |                                                                                                                                                                                                                                                                              |                                                       |                                          |                                                                                                                             |                                                                                                |
| 47 |                                                                                 |                 |                                                                                                                                                                                              |                                                                                                                                                                                                                                                                              |                                                       |                                          |                                                                                                                             |                                                                                                |
| 48 |                                                                                 |                 |                                                                                                                                                                                              |                                                                                                                                                                                                                                                                              |                                                       |                                          |                                                                                                                             |                                                                                                |
| 49 |                                                                                 |                 |                                                                                                                                                                                              |                                                                                                                                                                                                                                                                              |                                                       |                                          |                                                                                                                             |                                                                                                |

|    |              |                 |                                                                                                                                                                                                         |                                                                                                                                                                                                                                                              |                                 |                                           |                                                                                                                                                                          |                                           |
|----|--------------|-----------------|---------------------------------------------------------------------------------------------------------------------------------------------------------------------------------------------------------|--------------------------------------------------------------------------------------------------------------------------------------------------------------------------------------------------------------------------------------------------------------|---------------------------------|-------------------------------------------|--------------------------------------------------------------------------------------------------------------------------------------------------------------------------|-------------------------------------------|
| 1  |              |                 |                                                                                                                                                                                                         |                                                                                                                                                                                                                                                              |                                 |                                           |                                                                                                                                                                          |                                           |
| 2  |              |                 |                                                                                                                                                                                                         |                                                                                                                                                                                                                                                              |                                 |                                           |                                                                                                                                                                          |                                           |
| 3  | 2007 [86]    |                 | the family intervention recommendation within NICE's Schizophrenia guideline in three UK NHS Mental Health Trusts.                                                                                      |                                                                                                                                                                                                                                                              |                                 |                                           |                                                                                                                                                                          |                                           |
| 4  |              |                 | To investigate trainee participant understanding of the use of family interventions in their clinical area, identify themes related to implementation into practice following completion of the module. | <b>Family Intervention.</b> Integration of F-BFT and family CBT models: needs assessment, use of behavioural interventions related to stress management and problem solving, relapse management.                                                             | General, Not Reported           | Cross-sectional, Mixed Methods            | 5 trainees enrolled in the family intervention module.                                                                                                                   | Semi-structured interviews                |
| 5  | UK           | Journal Article |                                                                                                                                                                                                         |                                                                                                                                                                                                                                                              |                                 |                                           |                                                                                                                                                                          |                                           |
| 6  | (England),   |                 |                                                                                                                                                                                                         |                                                                                                                                                                                                                                                              |                                 |                                           |                                                                                                                                                                          |                                           |
| 7  | English,     |                 |                                                                                                                                                                                                         |                                                                                                                                                                                                                                                              |                                 |                                           |                                                                                                                                                                          |                                           |
| 8  | 2013 [92]    |                 |                                                                                                                                                                                                         |                                                                                                                                                                                                                                                              |                                 |                                           |                                                                                                                                                                          |                                           |
| 9  |              |                 |                                                                                                                                                                                                         |                                                                                                                                                                                                                                                              |                                 |                                           |                                                                                                                                                                          |                                           |
| 10 | UK           | Journal Article | To highlight issues encountered in service development and discuss development of the pilot project with a focus on why people who are trained in FI do not utilise the skills.                         | <b>Family Intervention.</b> Integration of F-BFT and family CBT models: needs assessment, use of behavioural interventions related to stress management and problem solving, relapse management.                                                             | General, Inpatient & Outpatient | Case Study & Cross-sectional, Qualitative | N/A                                                                                                                                                                      | a) Descriptive account<br>b) Focus groups |
| 11 | (England),   |                 |                                                                                                                                                                                                         |                                                                                                                                                                                                                                                              |                                 |                                           |                                                                                                                                                                          |                                           |
| 12 | English,     |                 |                                                                                                                                                                                                         |                                                                                                                                                                                                                                                              |                                 |                                           |                                                                                                                                                                          |                                           |
| 13 | 2007 [87]    |                 |                                                                                                                                                                                                         |                                                                                                                                                                                                                                                              |                                 |                                           |                                                                                                                                                                          |                                           |
| 14 | UK (Northern | Journal Article | To explore the roles and perspectives of mental health nurse practitioners towards clients with enduring mental illness and their carers following completion of PSI training.                          | <b>Family Intervention.</b> 'Psychosocial Intervention', developed from F-BFT: needs assessment, psychoeducation, skills training, problem-solving, relapse management, cognitive behavioural management strategies.                                         | General, Inpatient & Outpatient | Cross-sectional, Qualitative              | 8 MHNs.                                                                                                                                                                  | Focus groups                              |
| 15 | Ireland),    |                 |                                                                                                                                                                                                         |                                                                                                                                                                                                                                                              |                                 |                                           |                                                                                                                                                                          |                                           |
| 16 | English,     |                 |                                                                                                                                                                                                         |                                                                                                                                                                                                                                                              |                                 |                                           |                                                                                                                                                                          |                                           |
| 17 | 2008 [100]   |                 |                                                                                                                                                                                                         |                                                                                                                                                                                                                                                              |                                 |                                           |                                                                                                                                                                          |                                           |
| 18 | UK           | Journal Article | To examine the views of service users, relatives and care-coordinators of the value and barriers of involving family members in relapse prevention.                                                     | <b>Family Intervention.</b> 'Relapse Prevention Programme': six 1h manualised sessions; psychoeducation, relapse management, skills training, crisis intervention planning.                                                                                  | General, Outpatient             | Cross-sectional, Qualitative              | 18 CPNs, 2 OTs, 1 SW; 21 individuals diagnosed with Bipolar Disorder; 10 relatives: 6 spouses, 3 parents, 1 sibling                                                      | Semi-structured interviews                |
| 19 | (England),   |                 |                                                                                                                                                                                                         |                                                                                                                                                                                                                                                              |                                 |                                           |                                                                                                                                                                          |                                           |
| 20 | English,     |                 |                                                                                                                                                                                                         |                                                                                                                                                                                                                                                              |                                 |                                           |                                                                                                                                                                          |                                           |
| 21 | 2011 [70]    |                 |                                                                                                                                                                                                         |                                                                                                                                                                                                                                                              |                                 |                                           |                                                                                                                                                                          |                                           |
| 22 | Finland,     | Journal Article | To determine how the participation of relatives in treatment was experienced by the relatives themselves, by the patients and by staff members and what the consequences of such participation were.    | <b>Open Dialogue.</b> Rapid early involvement within 24 hours, as often as needed; meetings with any members of the patient's social network; collaborative participation of the patient and social network in every phase of decision making and treatment. | General, Outpatient             | Cross-sectional, Qualitative              | 8 psychiatrists, 5 CPs, 9 MHNs; 10 individuals diagnosed with Schizophrenia; 14 relatives: 4 mothers, 1 father, 3 sisters, 1 brother, 3 spouses, 2 ex-spouses, 1 cousin. | Semi-structured family interviews         |
| 23 | English,     |                 |                                                                                                                                                                                                         |                                                                                                                                                                                                                                                              |                                 |                                           |                                                                                                                                                                          |                                           |
| 24 | 2009 [95]    |                 |                                                                                                                                                                                                         |                                                                                                                                                                                                                                                              |                                 |                                           |                                                                                                                                                                          |                                           |
| 25 |              |                 |                                                                                                                                                                                                         |                                                                                                                                                                                                                                                              |                                 |                                           |                                                                                                                                                                          |                                           |
| 26 |              |                 |                                                                                                                                                                                                         |                                                                                                                                                                                                                                                              |                                 |                                           |                                                                                                                                                                          |                                           |
| 27 |              |                 |                                                                                                                                                                                                         |                                                                                                                                                                                                                                                              |                                 |                                           |                                                                                                                                                                          |                                           |
| 28 | Finland,     | Journal Article | To elucidate the experiences and importance of co-operation [in treatment] for the patients.                                                                                                            | <b>Open Dialogue.</b> Rapid early involvement; social network meetings; collaborative decision making and treatment.                                                                                                                                         | General, Outpatient             | Cross-sectional, Qualitative              | 22 individuals receiving treatment: 9 Psychosis Spectrum Disorder; 6 Depressive or Anxiety Disorder; 7 Other mental disorder.                                            | Semi-structured interviews                |
| 29 | English,     |                 |                                                                                                                                                                                                         |                                                                                                                                                                                                                                                              |                                 |                                           |                                                                                                                                                                          |                                           |
| 30 | 2004 [103]   |                 |                                                                                                                                                                                                         |                                                                                                                                                                                                                                                              |                                 |                                           |                                                                                                                                                                          |                                           |
| 31 |              |                 |                                                                                                                                                                                                         |                                                                                                                                                                                                                                                              |                                 |                                           |                                                                                                                                                                          |                                           |
| 32 |              |                 |                                                                                                                                                                                                         |                                                                                                                                                                                                                                                              |                                 |                                           |                                                                                                                                                                          |                                           |
| 33 | Finland,     | Journal Article | To illustrate Open Dialogue process and treatment principles, with illustration from case studies, 5 years on from introduction.                                                                        | <b>Open Dialogue.</b> Rapid early involvement; social network meetings; collaborative decision making and treatment.                                                                                                                                         | General, Inpatient & Outpatient | Case Study                                | N/A                                                                                                                                                                      | a) Descriptive account<br>b) Case series  |
| 34 | English,     |                 |                                                                                                                                                                                                         |                                                                                                                                                                                                                                                              |                                 |                                           |                                                                                                                                                                          |                                           |
| 35 | 2006 [98]    |                 |                                                                                                                                                                                                         |                                                                                                                                                                                                                                                              |                                 |                                           |                                                                                                                                                                          |                                           |
| 36 | Finland,     | Journal Article | To illustrate Open Dialogue process and treatment principles, with illustration from a case study.                                                                                                      | <b>Open Dialogue.</b> Rapid early involvement; social network meetings; collaborative decision making and treatment.                                                                                                                                         | General, Inpatient & Outpatient | Case Study                                | N/A                                                                                                                                                                      | a) Descriptive account<br>b) Case study   |
| 37 | English,     |                 |                                                                                                                                                                                                         |                                                                                                                                                                                                                                                              |                                 |                                           |                                                                                                                                                                          |                                           |
| 38 | 2001 [99]    |                 |                                                                                                                                                                                                         |                                                                                                                                                                                                                                                              |                                 |                                           |                                                                                                                                                                          |                                           |
| 39 | Finland,     | Journal Article | To illustrate Open Dialogue process and treatment principles, using examples of poor and good outcome case studies.                                                                                     | <b>Open Dialogue.</b> Rapid early involvement; social network meetings; collaborative decision making and treatment.                                                                                                                                         | General, Inpatient & Outpatient | Case Study                                | N/A                                                                                                                                                                      | a) Descriptive account<br>b) Case series  |
| 40 | English,     |                 |                                                                                                                                                                                                         |                                                                                                                                                                                                                                                              |                                 |                                           |                                                                                                                                                                          |                                           |
| 41 | 2001 [96]    |                 |                                                                                                                                                                                                         |                                                                                                                                                                                                                                                              |                                 |                                           |                                                                                                                                                                          |                                           |
| 42 | Finland,     | Journal Article | To clarify the co-evolving process between the family and hospital and                                                                                                                                  | <b>Open Dialogue.</b> Rapid early involvement; social network meetings; collaborative decision                                                                                                                                                               | General, Inpatient &            | Case Study                                | N/A                                                                                                                                                                      | a) Descriptive account                    |
| 43 | English,     |                 |                                                                                                                                                                                                         |                                                                                                                                                                                                                                                              |                                 |                                           |                                                                                                                                                                          |                                           |
| 44 |              |                 |                                                                                                                                                                                                         |                                                                                                                                                                                                                                                              |                                 |                                           |                                                                                                                                                                          |                                           |
| 45 |              |                 |                                                                                                                                                                                                         |                                                                                                                                                                                                                                                              |                                 |                                           |                                                                                                                                                                          |                                           |
| 46 |              |                 |                                                                                                                                                                                                         |                                                                                                                                                                                                                                                              |                                 |                                           |                                                                                                                                                                          |                                           |
| 47 |              |                 |                                                                                                                                                                                                         |                                                                                                                                                                                                                                                              |                                 |                                           |                                                                                                                                                                          |                                           |
| 48 |              |                 |                                                                                                                                                                                                         |                                                                                                                                                                                                                                                              |                                 |                                           |                                                                                                                                                                          |                                           |
| 49 |              |                 |                                                                                                                                                                                                         |                                                                                                                                                                                                                                                              |                                 |                                           |                                                                                                                                                                          |                                           |



1  
2  
3  
4  
5  
6  
7  
8  
9  
10  
11  
12  
13  
14  
15  
16  
17  
18  
19  
20  
21  
22  
23  
24  
25  
26  
27  
28  
29  
30  
31  
32  
33  
34  
35  
36  
37  
38  
39  
40  
41  
42  
43  
44  
45  
46  
47  
48  
49

|                                    |                 |                                                                                                                                                                                                                                                                                                                           |                                                                                                                                                                                                                     |                                                    |                                |                                                                                                                                   |                                                                                 |
|------------------------------------|-----------------|---------------------------------------------------------------------------------------------------------------------------------------------------------------------------------------------------------------------------------------------------------------------------------------------------------------------------|---------------------------------------------------------------------------------------------------------------------------------------------------------------------------------------------------------------------|----------------------------------------------------|--------------------------------|-----------------------------------------------------------------------------------------------------------------------------------|---------------------------------------------------------------------------------|
| 1994 [74]                          |                 | report some results using the Open Dialogue approach.                                                                                                                                                                                                                                                                     | making and treatment.                                                                                                                                                                                               | Outpatient                                         |                                |                                                                                                                                   | b) Case study                                                                   |
| UK (England), English, 2003 [90]   | Journal Article | To evaluate the Family Support Service in terms of satisfaction, clinical outcome, investigating aspects families found helpful/unhelpful and other factors possibly linked with satisfaction/outcome.                                                                                                                    | <b>Family Intervention.</b> 'Psychosocial Family Interventions for psychosis' following 'FIRST course' training: individual and family CBT with systemic perspective: needs assessment, education, skills training. | Specialised (Family Support Service), Outpatient   | Cross-Sectional, Qualitative   | 13 family interviews (23 individuals in total). Patients had 'psychotic symptoms'.                                                | Group interview                                                                 |
| United States, English, 2000 [104] | Journal Article | To examine the relationship between independent observers' and therapists' ratings of difficulty in implementing family treatment for patients with bipolar disorder and pre-treatment measures of relatives' emotional attitudes (EE), affective behaviours during family interactions, and patients' residual symptoms. | <b>Family Intervention.</b> 'Family Psychoeducation' adapted from F-BFT: psychoeducation, communication training, problem-solving, relapse management and crisis intervention planning.                             | Generic, Inpatient                                 | Cross-Sectional, Qualitative   | 26 individuals diagnosed with Bipolar Disorder; 33 relatives: 12 mothers, 13 fathers, 5 spouses, 1 Aunt, 1 cousin, 1 grandmother. | Semi-structured interviews                                                      |
| UK (England), English, 2005 [108]  | Journal Article | To obtain feedback from couples and families on various aspects of the systemic therapy service and suggestions for service improvement.                                                                                                                                                                                  | <b>Systemic Psychotherapy.</b> Milan systemic and narrative based approaches.                                                                                                                                       | Specialised (Systemic Therapy Service), Outpatient | Cross-Sectional, Mixed methods | 25 couples and families receiving systemic therapy for psychotic, personality, anxiety and depressive disorders.                  | a) Observation<br>b) Clinical interviews<br>c) Questionnaire (rating responses) |

---

*Abbreviations: BFT = Behavioural Family Therapy; F-BFT = Falloon's model of Behavioural Family Therapy; CBT = Cognitive Behavioural Therapy; FI = Family Intervention; CP = Clinical Psychologist; CPN = Community Psychiatric Nurse; MHN = Mental Health Nurse; OT = Occupational Therapist; SW = Social Worker.*



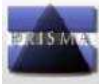

# PRISMA 2009 Checklist

| Section/topic             | #  | Checklist item                                                                                                                                                                                                                                                                                              | Reported on page #                                                  |
|---------------------------|----|-------------------------------------------------------------------------------------------------------------------------------------------------------------------------------------------------------------------------------------------------------------------------------------------------------------|---------------------------------------------------------------------|
| <b>TITLE</b>              |    |                                                                                                                                                                                                                                                                                                             |                                                                     |
| Title                     | 1  | Identify the report as a systematic review, meta-analysis, or both.                                                                                                                                                                                                                                         | 1                                                                   |
| <b>ABSTRACT</b>           |    |                                                                                                                                                                                                                                                                                                             |                                                                     |
| Structured summary        | 2  | Provide a structured summary including, as applicable: background; objectives; data sources; study eligibility criteria, participants, and interventions; study appraisal and synthesis methods; results; limitations; conclusions and implications of key findings; systematic review registration number. | 2-3                                                                 |
| <b>INTRODUCTION</b>       |    |                                                                                                                                                                                                                                                                                                             |                                                                     |
| Rationale                 | 3  | Describe the rationale for the review in the context of what is already known.                                                                                                                                                                                                                              | 4-5                                                                 |
| Objectives                | 4  | Provide an explicit statement of questions being addressed with reference to participants, interventions, comparisons, outcomes, and study design (PICOS).                                                                                                                                                  | 5                                                                   |
| <b>METHODS</b>            |    |                                                                                                                                                                                                                                                                                                             |                                                                     |
| Protocol and registration | 5  | Indicate if a review protocol exists, if and where it can be accessed (e.g., Web address), and, if available, provide registration information including registration number.                                                                                                                               | Protocol was uploaded as a supplementary file                       |
| Eligibility criteria      | 6  | Specify study characteristics (e.g., PICOS, length of follow-up) and report characteristics (e.g., years considered, language, publication status) used as criteria for eligibility, giving rationale.                                                                                                      | 6                                                                   |
| Information sources       | 7  | Describe all information sources (e.g., databases with dates of coverage, contact with study authors to identify additional studies) in the search and date last searched.                                                                                                                                  | 5-6                                                                 |
| Search                    | 8  | Present full electronic search strategy for at least one database, including any limits used, such that it could be repeated.                                                                                                                                                                               | 5-6. Database search strategy was uploaded as a supplementary file. |
| Study selection           | 9  | State the process for selecting studies (i.e., screening, eligibility, included in systematic review, and, if applicable, included in the meta-analysis).                                                                                                                                                   | 5-7. Figure 1 (PRISMA flow Diagram)                                 |
| Data collection process   | 10 | Describe method of data extraction from reports (e.g., piloted forms, independently, in duplicate) and any processes for obtaining and confirming data from investigators.                                                                                                                                  | 7-8                                                                 |

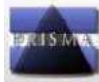

# PRISMA 2009 Checklist

1  
2  
3  
4  
5  
6  
7  
8  
9  
10  
11  
12  
13  
14  
15  
16  
17  
18  
19  
20  
21  
22  
23  
24  
25  
26  
27  
28  
29  
30  
31  
32  
33  
34  
35  
36  
37  
38  
39  
40  
41  
42  
43  
44  
45  
46  
47  
48  
49

|                                    |    |                                                                                                                                                                                                                        |                                              |
|------------------------------------|----|------------------------------------------------------------------------------------------------------------------------------------------------------------------------------------------------------------------------|----------------------------------------------|
| Data items                         | 11 | List and define all variables for which data were sought (e.g., PICOS, funding sources) and any assumptions and simplifications made.                                                                                  | 7-8                                          |
| Risk of bias in individual studies | 12 | Describe methods used for assessing risk of bias of individual studies (including specification of whether this was done at the study or outcome level), and how this information is to be used in any data synthesis. | N/A (See strengths and limitations, page 16) |
| Summary measures                   | 13 | State the principal summary measures (e.g., risk ratio, difference in means).                                                                                                                                          | 7 (Methods of analysis paragraph)            |
| Synthesis of results               | 14 | Describe the methods of handling data and combining results of studies, if done, including measures of consistency (e.g., $I^2$ ) for each meta-analysis.                                                              | 7 (Methods of analysis paragraph)            |

Page 1 of 2

| Section/topic               | #  | Checklist item                                                                                                                                                  | Reported on page #                           |
|-----------------------------|----|-----------------------------------------------------------------------------------------------------------------------------------------------------------------|----------------------------------------------|
| Risk of bias across studies | 15 | Specify any assessment of risk of bias that may affect the cumulative evidence (e.g., publication bias, selective reporting within studies).                    | N/A (See strengths and limitations, page 16) |
| Additional analyses         | 16 | Describe methods of additional analyses (e.g., sensitivity or subgroup analyses, meta-regression), if done, indicating which were pre-specified.                | N/A (See strengths and limitations, page 16) |
| <b>RESULTS</b>              |    |                                                                                                                                                                 |                                              |
| Study selection             | 17 | Give numbers of studies screened, assessed for eligibility, and included in the review, with reasons for exclusions at each stage, ideally with a flow diagram. | Page 8 and Figure 1                          |
| Study characteristics       | 18 | For each study, present characteristics for which data were extracted (e.g., study size, PICOS, follow-up period) and provide the citations.                    | Page 8-9 and Supplementary Table 1           |
| Risk of bias within studies | 19 | Present data on risk of bias of each study and, if available, any outcome level assessment (see item 12).                                                       | N/A (See strengths and limitations, page 16) |

For peer review only - <http://bmjopen.bmj.com/site/about/guidelines.xhtml>



# PRISMA 2009 Checklist

1  
2  
3  
4  
5  
6  
7  
8  
9  
10  
11  
12  
13  
14  
15  
16  
17  
18  
19  
20  
21  
22  
23  
24  
25  
26  
27  
28  
29  
30  
31  
32  
33  
34  
35  
36  
37  
38  
39  
40  
41  
42  
43  
44  
45  
46  
47  
48  
49

|                               |    |                                                                                                                                                                                                          |                                                                    |
|-------------------------------|----|----------------------------------------------------------------------------------------------------------------------------------------------------------------------------------------------------------|--------------------------------------------------------------------|
| Results of individual studies | 20 | For all outcomes considered (benefits or harms), present, for each study: (a) simple summary data for each intervention group (b) effect estimates and confidence intervals, ideally with a forest plot. | N/A (Data analysed using a theoretical thematic analysis approach) |
| Synthesis of results          | 21 | Present results of each meta-analysis done, including confidence intervals and measures of consistency.                                                                                                  | N/A (Data analysed using a theoretical thematic analysis approach) |
| Risk of bias across studies   | 22 | Present results of any assessment of risk of bias across studies (see Item 15).                                                                                                                          | N/A (See strengths and limitations, page 16)                       |
| Additional analysis           | 23 | Give results of additional analyses, if done (e.g., sensitivity or subgroup analyses, meta-regression [see Item 16]).                                                                                    | N/A (See strengths and limitations, page 16)                       |
| <b>DISCUSSION</b>             |    |                                                                                                                                                                                                          |                                                                    |
| Summary of evidence           | 24 | Summarize the main findings including the strength of evidence for each main outcome; consider their relevance to key groups (e.g., healthcare providers, users, and policy makers).                     | 14-15, 16-17                                                       |
| Limitations                   | 25 | Discuss limitations at study and outcome level (e.g., risk of bias), and at review-level (e.g., incomplete retrieval of identified research, reporting bias).                                            | 15-16                                                              |
| Conclusions                   | 26 | Provide a general interpretation of the results in the context of other evidence, and implications for future research.                                                                                  | 16-18                                                              |
| <b>FUNDING</b>                |    |                                                                                                                                                                                                          |                                                                    |
| Funding                       | 27 | Describe sources of funding for the systematic review and other support (e.g., supply of data); role of funders for the systematic review.                                                               | 18                                                                 |



# PRISMA 2009 Checklist

- 1
- 2
- 3
- 4
- 5
- 6
- 7
- 8
- 9
- 10
- 11
- 12
- 13
- 14
- 15
- 16
- 17
- 18
- 19
- 20
- 21
- 22
- 23
- 24
- 25
- 26
- 27
- 28
- 29
- 30
- 31
- 32
- 33
- 34
- 35
- 36
- 37
- 38
- 39
- 40
- 41
- 42
- 43
- 44
- 45
- 46
- 47
- 48
- 49

For more information, visit: [www.prisma-statement.org](http://www.prisma-statement.org).

Page 2 of 2

For peer review only
