# Supplementary material for: Implementing family involvement in the treatment of patients with psychosis: a systematic review of facilitating and hindering factors
Source: PubMed Central journal article supplement — BMJ Open. 2014 Oct 3;4(10):e006108. doi: 10.1136/bmjopen-2014-006108 (PMC4187461; doi:10.1136/bmjopen-2014-006108), 2014-10-03
Supplement: bmjopen-2014-006108.reviewer_comments.pdf [file bmjopen-2014-006108.reviewer_comments.pdf]

## PEER REVIEW HISTORY

BMJ Open publishes all reviews undertaken for accepted manuscripts. Reviewers are asked to complete a checklist review form (<http://bmjopen.bmj.com/site/about/resources/checklist.pdf>) and are provided with free text boxes to elaborate on their assessment. These free text comments are reproduced below. Some articles will have been accepted based in part or entirely on reviews undertaken for other BMJ Group journals. These will be reproduced where possible.

### ARTICLE DETAILS

|                            |                                                                                                                                         |
|----------------------------|-----------------------------------------------------------------------------------------------------------------------------------------|
| <b>TITLE (PROVISIONAL)</b> | Implementing family involvement in the treatment of patients with psychosis: a systematic review of facilitating and hindering factors. |
| <b>AUTHORS</b>             | Eassom, Erica; Giacco, Domenico; Dirik, Aysegul; Priebe, Stefan                                                                         |

### VERSION 1 - REVIEW

|                        |                                                                                                                                                                              |
|------------------------|------------------------------------------------------------------------------------------------------------------------------------------------------------------------------|
| <b>REVIEWER</b>        | Dr Grainne Fadden<br>Meriden Family Programme<br>Birmingham and Solihull Mental Health NHS Foundation Trust<br>Tall Trees<br>Uffculme Centre<br>Queensbridge Road<br>Moseley |
| <b>REVIEW RETURNED</b> | 25-Jul-2014                                                                                                                                                                  |

|                         |                                                                                                                                                                                                                                                                                                                                                                                                                                                                                                                                                                                                                                                                                                                                                                                                                                                                                                                                                                                                                                                                                                                                                                                                                                                                                                                                                                                                                                                                                                                                                                                                    |
|-------------------------|----------------------------------------------------------------------------------------------------------------------------------------------------------------------------------------------------------------------------------------------------------------------------------------------------------------------------------------------------------------------------------------------------------------------------------------------------------------------------------------------------------------------------------------------------------------------------------------------------------------------------------------------------------------------------------------------------------------------------------------------------------------------------------------------------------------------------------------------------------------------------------------------------------------------------------------------------------------------------------------------------------------------------------------------------------------------------------------------------------------------------------------------------------------------------------------------------------------------------------------------------------------------------------------------------------------------------------------------------------------------------------------------------------------------------------------------------------------------------------------------------------------------------------------------------------------------------------------------------|
| <b>GENERAL COMMENTS</b> | <p>This is an excellent review of an important area - trying to help to untangle why family work is so poorly implemented given the strong evidence base for it.</p> <p>The review is well executed and thorough with clear methodology. It is well written and presented and the conclusions are valid. I think it will make a very valuable contribution to the discussion on this challenging area, and I therefore recommend that it should be accepted for publication.</p> <p>There is just one typing error I picked up on page 13 should be importance rather than important.</p> <p>I wondered about the use of the term 'facilitator' which I found confusing initially in that the term is often used to describe those who deliver the training in family work. This may cause some confusion in that people who are reading it may think initially that it refers to issues relating to trainers. I wondered if the term 'facilitating factors' might be used instead as this is what is meant and would avoid any confusion.</p> <p>Re references: A report by Bisnauth is mentioned - this has actually been published as Fadden, G., Heelis, B, &amp; Bisnauth (2010) Training mental health care professionals in Behavioural Family Therapy: an audit of trainers' experiences in the West Midlands. Journal of Mental Health Training and Practice, 5 (2), 27 -35.</p> <p>Another article is not referenced that may be of interest - Fadden, G. &amp; Heelis, B. (2011) The Meriden Family Programme: Lessons learned over ten years. Journal of Mental Health, 20, 79-88.</p> |
|-------------------------|----------------------------------------------------------------------------------------------------------------------------------------------------------------------------------------------------------------------------------------------------------------------------------------------------------------------------------------------------------------------------------------------------------------------------------------------------------------------------------------------------------------------------------------------------------------------------------------------------------------------------------------------------------------------------------------------------------------------------------------------------------------------------------------------------------------------------------------------------------------------------------------------------------------------------------------------------------------------------------------------------------------------------------------------------------------------------------------------------------------------------------------------------------------------------------------------------------------------------------------------------------------------------------------------------------------------------------------------------------------------------------------------------------------------------------------------------------------------------------------------------------------------------------------------------------------------------------------------------|

|  |                                                                                              |
|--|----------------------------------------------------------------------------------------------|
|  | The latter has implementation issues drawn from staff implementing it over a 10 year period. |
|--|----------------------------------------------------------------------------------------------|

|                        |                                                                                                                                                                                                                                                                                                |
|------------------------|------------------------------------------------------------------------------------------------------------------------------------------------------------------------------------------------------------------------------------------------------------------------------------------------|
| <b>REVIEWER</b>        | Dr Jonathan Mitchell<br>Sheffield Health & Social Care NHS Foundation Trust,<br>Sheffield,<br>England.<br><br>I have been involved in writing NICE guidance that recommends family interventions for people with psychosis and previously led some work in my Trust to increase the use of FI. |
| <b>REVIEW RETURNED</b> | 05-Aug-2014                                                                                                                                                                                                                                                                                    |

|                         |                                                                                                                                                                                                                                                                                                                                                                                                                                                                                                                                                                                                                                                           |
|-------------------------|-----------------------------------------------------------------------------------------------------------------------------------------------------------------------------------------------------------------------------------------------------------------------------------------------------------------------------------------------------------------------------------------------------------------------------------------------------------------------------------------------------------------------------------------------------------------------------------------------------------------------------------------------------------|
| <b>GENERAL COMMENTS</b> | Just a couple of comments about the numbers of studies.<br><br>The paper says the search found 9950 titles to screen, but figure 1 reports 15615. I wondered if the numbers should be the same in the text and diagram or if I missed something.<br><br>The authors say they included 43 papers, but in the "overview of papers" section publication date is only described for 41 and when describing the type of intervention evaluated includes 45 approaches (though some studies may have looked at more than one?)<br><br>I'm not sure it requires revision as such, I'd just like some clarification on the numbers mentioned in my comment above. |
|-------------------------|-----------------------------------------------------------------------------------------------------------------------------------------------------------------------------------------------------------------------------------------------------------------------------------------------------------------------------------------------------------------------------------------------------------------------------------------------------------------------------------------------------------------------------------------------------------------------------------------------------------------------------------------------------------|

#### VERSION 1 – AUTHOR RESPONSE

a) There is just one typing error I picked up on page 13 should be importance rather than important.

Authors: Typo corrected (See page 13, line 15).

b) I wondered about the use of the term 'facilitator' which I found confusing initially in that the term is often used to describe those who deliver the training in family work. This may cause some confusion in that people who are reading it may think initially that it refers to issues relating to trainers. I wondered if the term 'facilitating factors' might be used instead as this is what is meant and would avoid any confusion.

Authors: We changed "facilitators" with "facilitating factors" throughout the paper, in the figures, in the tables and in the protocol.

c) Re references: A report by Bisnauth is mentioned - this has actually been published as Fadden, G., Heelis, B, & Bisnauth (2010) Training mental health care professionals in Behavioural Family Therapy: an audit of trainers' experiences in the West Midlands. Journal of Mental Health Training and Practice, 5 (2), 27 -35.

Authors: Reference [79] was amended according to this comment.

d) Another article is not referenced that may be of interest - Fadden, G. & Heelis, B. (2011) The

Meriden Family Programme: Lessons learned over ten years. *Journal of Mental Health*, 20, 79-88.  
The latter has implementation issues drawn from staff implementing it over a 10 year period.

Authors: The paper was identified by our search strategy. Upon discussion, we excluded the paper as "not reporting empirical data" to be consistent with the exclusion of other studies on general experiences, opinions, satisfaction or needs.

The reason for this is that the study reported in the paper does not make reference to a specific experience of implementation of family work in a service (or group of services), but rather collects the opinions and views of experienced professionals and carers on facilitating factors for family work to help future service planning. Nevertheless, we felt that we need to include the paper in the discussion as it looked at implementation issues from a different perspective, i.e. expert views from professionals and carers involved instead of our review of implementation studies. Therefore we mentioned the paper in the section of the discussion on "Comparison with available literature" (See page 17, lines 7-10). (See page 17, lines 7-10).

We believe that, since the issues reported are similar in the two papers, this further validates the findings and we are grateful for the helpful suggestion.

e) Just a couple of comments about the numbers of studies.

The paper says the search found 9950 titles to screen, but figure 1 reports 15615. I wondered if the numbers should be the same in the text and diagram or if I missed something.

Authors: The correct numbers were those in Figure 1. We modified the text accordingly (See page 8, lines 10-15).

f) The authors say they included 43 papers, but in the "overview of papers" section publication date is only described for 41 and when describing the type of intervention evaluated includes 45 approaches (though some studies may have looked at more than one?)

Authors: The included papers and the type of interventions evaluated were 43 (the papers describing systemic psychotherapy intervention were 3 not 5). This was corrected in the text (See page 8, lines 12-19).
